# Supplementary material for: Palladium-catalyzed hydroamination of vinylidenecyclopropane-diester with pyrroles and indoles: an approach to azaaromatic vinylcyclopropanes
Source: Royal Society of Chemistry journal article supplement (doi:10.1039/d2cc03635e), 2022-01-01

## Supporting Information

### **Palladium-Catalyzed Hydroamination of Vinylidenecyclopropane-Diester with Pyrroles and Indoles: An Approach to Azaaromatic Vinylcyclopropanes**

Ze-ren Yang<sup>a</sup>, Bo Zhang<sup>a</sup>, Yong-jie Long<sup>a</sup>, Min Shi<sup>\*a</sup>

<sup>a</sup> State Key Laboratory of Organometallic Chemistry, Center for Excellence in Molecular Synthesis, University of Chinese Academy of Sciences, Shanghai Institute of Organic Chemistry, Chinese Academy of Sciences, 345 Lingling Road, Shanghai 200032, China. Email: [mshi@mail.sioc.ac.cn](mailto:mshi@mail.sioc.ac.cn).

#### **CONTENTS**

|                                                                |           |
|----------------------------------------------------------------|-----------|
| <b>(A) General Information</b> .....                           | <b>2</b>  |
| <b>(B) General Procedure for Preparation of Products</b> ..... | <b>3</b>  |
| <b>(C) Mechanistic Studies</b> .....                           | <b>4</b>  |
| <b>(D) Characterization Data of Products.</b> .....            | <b>6</b>  |
| <b>(E) Spectroscopic Data of Products (NMR Spectra)</b> .....  | <b>16</b> |

## (A) General Information

Proton nuclear magnetic resonance ( $^1\text{H}$  NMR) spectra, carbon nuclear magnetic resonance ( $^{13}\text{C}$  NMR) spectra fluorine nuclear magnetic resonance ( $^{19}\text{F}$  NMR) were recorded at 400 MHz, 100 MHz and 367 MHz, respectively. Data are presented as follows: chemical shift (ppm), multiplicity (s = singlet, d = doublet, t = triplet, q = quartet, m = multiplet), coupling constants in Hertz (Hz) and integration. Mass and High-resolution mass spectra (HRMS) spectra were recorded by ESI method. The employed solvents were dry up by standard methods when necessary. Commercially obtained reagents were used without further purification. Petroleum ether refers to the fraction with boiling point in the range 60-90 °C. For thin-layer chromatography (TLC), silica gel plates (Huanghai GF254) were used. Flash column chromatography was carried out using 300-400 mesh silica gel at increased pressure.

The preparation of vinylidenecyclopropane-diester **1**<sup>1</sup> followed the previous literature procedure.

1. Chen, J.; Gao, S.; Chen, M. *Org. Lett.* **2019**, *21*, 8800-8804.

## (B) General Procedure for Preparation of Products

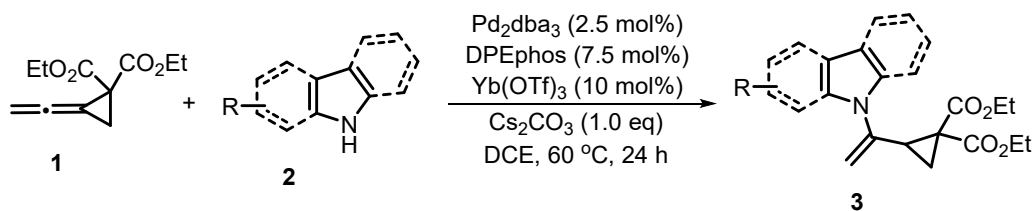

**Scheme S1**

A dried 10 mL Sealed tube was charged with Pd<sub>2</sub>dba<sub>3</sub> (0.0025 mmol, 2.5 mol%), DPEphos (0.0075 mmol, 7.5 mol%), Yb(OTf)<sub>3</sub> (0.001 mmol, 10 mol%), Cs<sub>2</sub>CO<sub>3</sub> (0.1 mmol, 1.0 equiv) and azaaromatic substrates **2** (0.1 mmol, 1.0 equiv). Then the reaction tube was evacuated and backfilled with argon for 3 times, followed by addition of VDCP **1** (0.2 mmol, 2.0 equiv) and DCE (1.0 mL). The reaction mixture was stirred at 60 °C. After 24 h, the reaction mixture was concentrated under reduced pressure and purified by a flash silica gel chromatography (Petroleum Ether : Ethyl Acetate = 6 : 1, v/v) to afford the desired products.

### (C) Mechanistic Studies

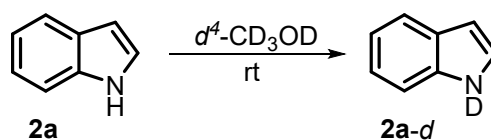

Scheme S2

*N*-deuterium labeled indole **2a-D** was synthesized as following procedure: in a dried 10 mL schlenk tube, indole (1.0 g, 8.55 mmol) was dissolved in  $d^4\text{-CD}_3\text{OD}$  (4.5 mL, 173 mmol) and the mixture was stirred at room temperature for 4 hours. Then the mixture was concentrated under vacuum to remove the solvent.  $d^4\text{-CD}_3\text{OD}$  (4.5 mL) was added into the schlenk tube again and the mixture was stirred at room temperature for another 4 hours. Then, we repeat the same experimental handling for the third time. After that, the resulting mixture was concentrated under vacuum to give the desired product **2a-D** in quantitative yield along with 92% D content.

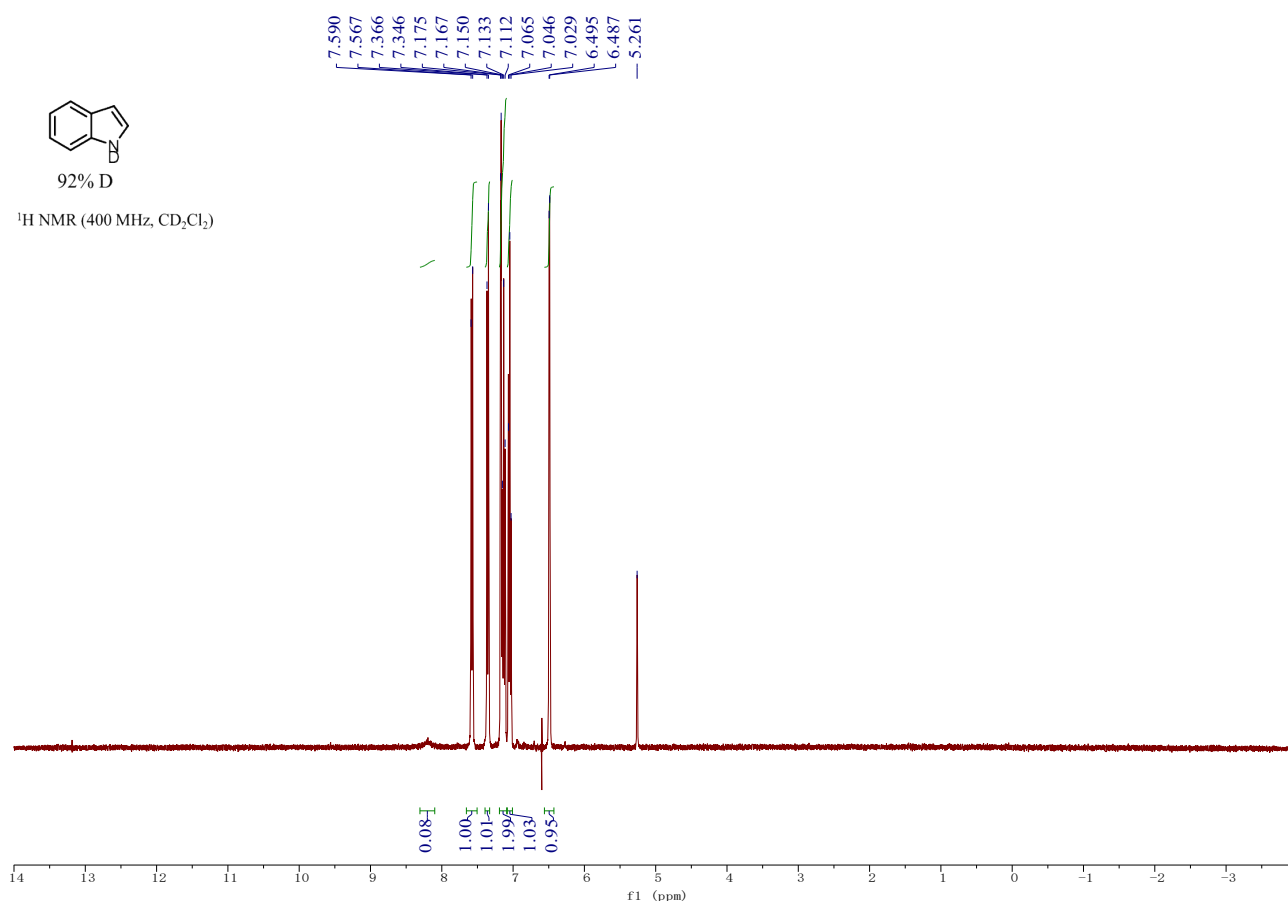

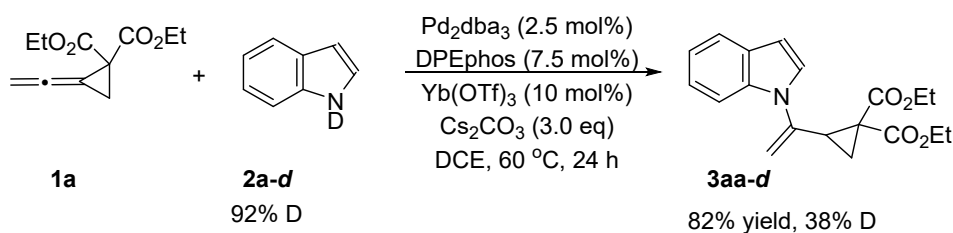

### Scheme S3

A dried 10 mL sealed tube was charged with Pd<sub>2</sub>dba<sub>3</sub> (0.0025 mmol, 2.5 mol%), DPEphos (0.0075 mmol, 7.5 mol%), Yb(OTf)<sub>3</sub> (0.001 mmol, 10 mol%), Cs<sub>2</sub>CO<sub>3</sub> (0.3 mmol, 3.0 equiv) and azaaromatic substrates **2a-d** (0.1 mmol, 1.0 equiv). Then the reaction tube was evacuated and backfilled with argon for 3 times, followed by addition of VDCP **1a** (0.2 mmol, 2.0 equiv) and DCE (1.0 mL). The reaction mixture was stirred at 60 °C. After 24 h, the reaction mixture was concentrated under reduced pressure and purified by a flash silica gel chromatography (Petroleum Ether : Ethyl Acetate = 6 : 1, v/v) to afford the desired product **3aa-d** in 82% yield (26.7 mg) along with 38% D content at the  $\alpha$ -position of VCP product.

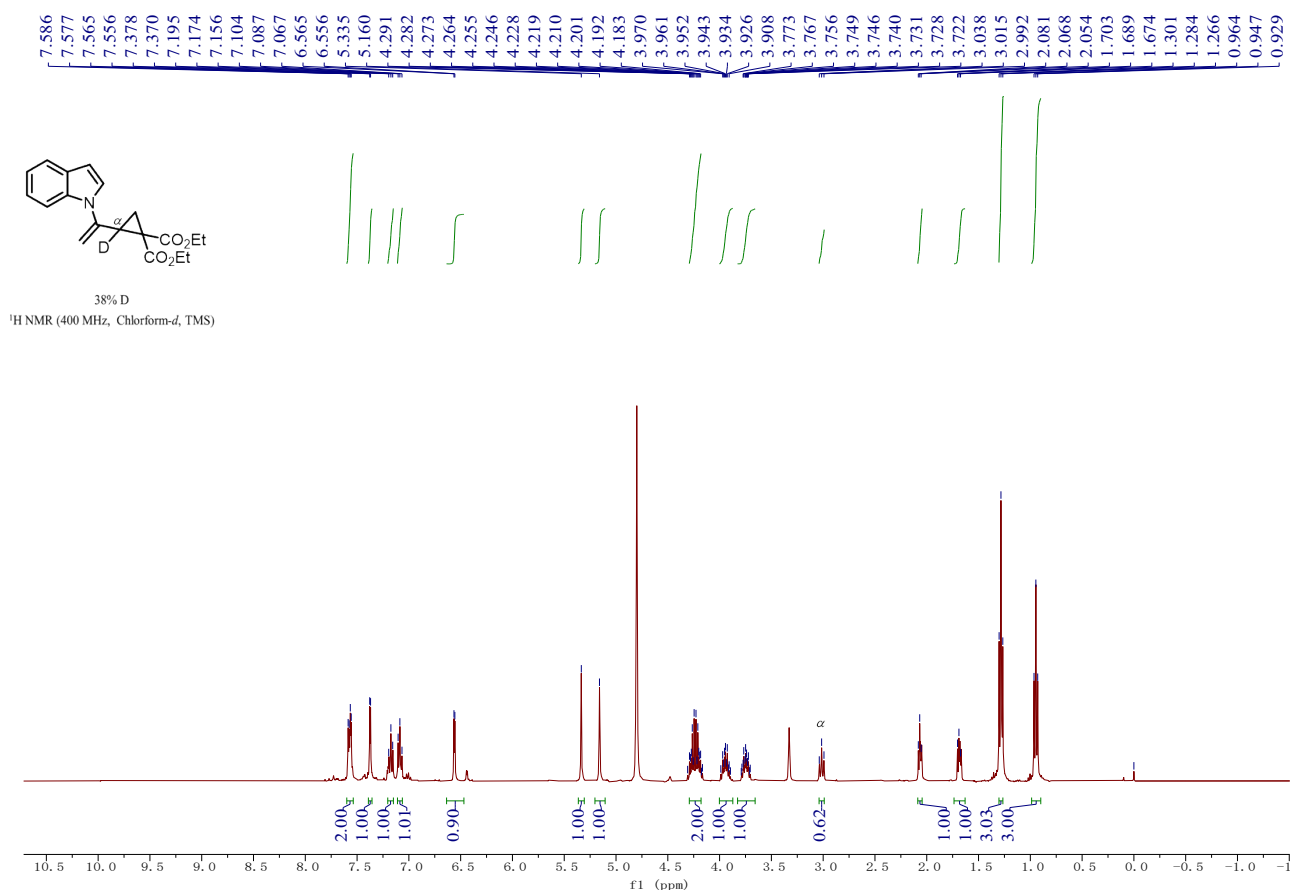

#### (D) Characterization Data of Products.

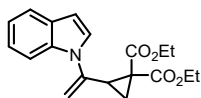

**Diethyl 2-(1-(1H-indol-1-yl)vinyl)cyclopropane-1,1-dicarboxylate (3aa).** The title compound was achieved as yellow oil (26.9 mg, 82%). <sup>1</sup>H NMR (400 MHz, Chloroform-*d*, TMS) δ 7.60 (d, *J* = 8.5 Hz, 2H), 7.37 (d, *J* = 3.3 Hz, 1H), 7.27 – 7.17 (m, 1H), 7.14 – 7.12 (m, 1H), 6.58 (d, *J* = 3.4 Hz, 1H), 5.33 (s, 1H), 5.10 (s, 1H), 4.32 – 4.16 (m, 2H), 4.09 – 3.97 (m, 1H), 3.89 – 3.77 (m, 1H), 2.95 (t, *J* = 8.6 Hz, 1H), 2.06 (dd, *J* = 7.9, 5.3 Hz, 1H), 1.67 (dd, *J* = 9.2, 5.3 Hz, 1H), 1.28 (t, *J* = 7.1 Hz, 3H), 1.00 (t, *J* = 7.2 Hz, 3H); <sup>13</sup>C NMR (100 MHz, Chloroform-*d*, TMS) δ 169.0, 166.1, 138.7, 135.6, 126.5, 122.3, 120.9, 120.4, 111.5, 106.2, 103.5, 61.9, 61.8, 37.3, 31.1, 18.3, 14.0, 13.7; IR (EtOH): ν 2986, 2901, 1727, 1645, 1521, 1475, 1456, 1369 cm<sup>-1</sup>; HRMS (ESI) Calcd. for C<sub>19</sub>H<sub>21</sub>NO<sub>4</sub>Na: 350.1363, Found: 350.1359.

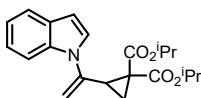

**Diisopropyl 2-(1-(1H-indol-1-yl)vinyl)cyclopropane-1,1-dicarboxylate (3ba).** The title compound was achieved as colorless oil (28.7 mg, 81%). <sup>1</sup>H NMR (400 MHz, Chloroform-*d*, TMS) δ 7.64 (d, *J* = 8.3 Hz, 1H), 7.60 (d, *J* = 7.8 Hz, 1H), 7.40 (d, *J* = 3.4 Hz, 1H), 7.21 (t, *J* = 7.2 Hz, 1H), 7.12 (t, *J* = 7.4 Hz, 1H), 6.57 (d, *J* = 3.4 Hz, 1H), 5.31 (s, 1H), 5.12 (hept, *J* = 6.3 Hz, 1H), 5.05 (s, 1H), 4.85 (hept, *J* = 6.3 Hz, 1H), 2.88 (t, *J* = 8.5 Hz, 1H), 2.02 (dd, *J* = 7.8, 5.2 Hz, 1H), 1.62 (dd, *J* = 9.2, 5.2 Hz, 1H), 1.30 (d, *J* = 6.2 Hz, 3H), 1.27 (d, *J* = 6.3 Hz, 3H), 1.19 (d, *J* = 6.2 Hz, 3H), 0.84 (d, *J* = 6.2 Hz, 3H); <sup>13</sup>C NMR (100 MHz, Chloroform-*d*, TMS) δ 168.6, 165.6, 138.7, 135.6, 129.5, 126.7, 122.2, 120.9, 120.4, 111.7, 105.2, 103.4, 69.6, 69.5, 37.8, 30.9, 21.7, 21.5, 21.3, 17.8; IR (EtOH): ν 2987, 2901, 1720, 1644, 1456, 1405, 1394, 1313, 1208 cm<sup>-1</sup>; HRMS (ESI) Calcd. for C<sub>21</sub>H<sub>25</sub>NO<sub>4</sub>Na: 378.1676, Found: 378.1672.

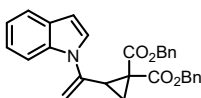

**Dibenzyl 2-(1-(1H-indol-1-yl)vinyl)cyclopropane-1,1-dicarboxylate (3ca).** The title compound

was achieved as colorless oil (19.9 mg, 44%). <sup>1</sup>H NMR (400 MHz, Chloroform-*d*, TMS) δ 7.60 (d, *J* = 7.7 Hz, 1H), 7.56 (d, *J* = 8.2 Hz, 1H), 7.35 – 7.09 (m, 11H), 6.99 (d, *J* = 7.3 Hz, 2H), 6.51 (d, *J* = 3.4 Hz, 1H), 5.216 (d, *J* = 12.4 Hz, 2H), 5.215 (s, 1H), 5.14 (d, *J* = 12.4 Hz, 1H), 5.05 (s, 1H), 4.93 (d, *J* = 12.1 Hz, 1H), 4.70 (d, *J* = 12.2 Hz, 1H), 3.01 (t, *J* = 8.5 Hz, 1H), 2.10 (dd, *J* = 7.9, 5.3 Hz, 1H), 1.72 (dd, *J* = 9.2, 5.3 Hz, 1H); <sup>13</sup>C NMR (100 MHz, Chloroform-*d*, TMS) δ 168.8, 165.8, 138.4, 135.6, 135.2, 134.9, 129.4, 128.6, 128.4, 128.3, 128.2, 128.1, 128.0, 126.5, 122.3, 121.0, 120.5, 111.6, 106.3, 103.6, 67.8, 67.6, 37.2, 31.7, 18.9; IR (EtOH): ν 2960, 2923, 1728, 1644, 1474, 1456, 1378, 1317, 1274, 1213, 1195, 1129, 1079 cm<sup>-1</sup>; HRMS (ESI) Calcd. for C<sub>29</sub>H<sub>25</sub>NO<sub>4</sub>Na: 474.1676, Found: 474.1683.

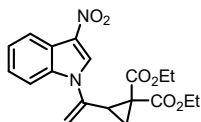

**Diethyl 2-(1-(3-nitro-1H-indol-1-yl)vinyl)cyclopropane-1,1-dicarboxylate (3ab).** The title compound was achieved as a yellow oil (14.4 mg, 39%). <sup>1</sup>H NMR (400 MHz, Chloroform-*d*, TMS) δ 8.32 (s, 1H), 8.30 (d, *J* = 11.5 Hz, 1H), 7.59 (d, *J* = 7.9 Hz, 1H), 7.43 – 7.36 (m, 2H), 5.53 (s, 1H), 5.43 (s, 1H), 4.38 – 4.18 (m, 2H), 4.18 – 4.07 (m, 1H), 4.03 – 3.91 (m, 1H), 2.91 (t, *J* = 8.4 Hz, 1H), 2.02 (dd, *J* = 7.8, 5.5 Hz, 1H), 1.74 (dd, *J* = 9.1, 5.5 Hz, 1H), 1.30 (t, *J* = 7.1 Hz, 3H), 1.11 (t, *J* = 7.1 Hz, 3H); <sup>13</sup>C NMR (100 MHz, Chloroform-*d*, TMS) δ 168.3, 165.8, 137.8, 135.0, 130.3, 129.0, 124.9, 124.5, 120.9, 120.8, 112.7, 112.1, 62.3, 62.1, 37.5, 30.2, 18.3, 13.9, 13.8; IR (EtOH): ν 2986, 2921, 1727, 1649, 1535, 1481, 1452, 1378 cm<sup>-1</sup>; HRMS (ESI) Calcd. for C<sub>19</sub>H<sub>20</sub>N<sub>2</sub>O<sub>6</sub>Na: 395.1214, Found: 395.1208.

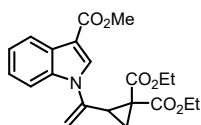

**Diethyl 2-(1-(3-(methoxycarbonyl)-1H-indol-1-yl)vinyl)cyclopropane-1,1-dicarboxylate (3ac).** The title compound was achieved as colorless oil (19.2 mg, 50%). <sup>1</sup>H NMR (400 MHz, Chloroform-*d*, TMS) δ 8.21 – 8.18 (m, 1H), 8.01 (s, 1H), 7.59 – 7.51 (m, 1H), 7.32 – 7.24 (m, 2H), 5.43 (s, 1H), 5.29 (s, 1H), 4.34 – 4.14 (m, 3H), 4.15 – 4.02 (m, 1H), 3.92 (s, 3H), 3.91 – 3.81 (m, 1H), 2.95 (t, *J* = 8.0 Hz, 1H), 2.00 (dd, *J* = 7.8, 5.3 Hz, 1H), 1.70 (dd, *J* = 9.1, 5.3 Hz, 1H), 1.29 (t, *J*

= 7.2 Hz, 3H), 1.05 (t,  $J = 7.1$  Hz, 3H);  $^{13}\text{C}$  NMR (100 MHz, Chloroform-*d*, TMS)  $\delta$  168.7, 166.0, 165.2, 138.5, 136.3, 132.9, 126.9, 123.4, 122.5, 121.7, 111.7, 110.4, 108.9, 62.1, 62.0, 61.1, 37.5, 30.6, 18.5, 14.0, 13.7; IR (EtOH):  $\nu$  2988, 2901, 1709, 1647, 1539, 1456, 1394, 1378  $\text{cm}^{-1}$ ; HRMS (ESI) Calcd. for  $\text{C}_{21}\text{H}_{23}\text{NO}_6\text{Na}$ : 408.1418, Found: 408.1412.

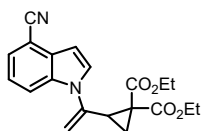

**Diethyl 2-(1-(4-cyano-1H-indol-1-yl)vinyl)cyclopropane-1,1-dicarboxylate (3ad).** The title compound was achieved as colorless oil (33.1 mg, 94%).  $^1\text{H}$  NMR (400 MHz, Chloroform-*d*, TMS)  $\delta$  7.80 (d,  $J = 8.4$  Hz, 1H), 7.54 (d,  $J = 3.4$  Hz, 1H), 7.49 (d,  $J = 7.3$  Hz, 1H), 7.25 (t,  $J = 8.0$  Hz, 1H), 6.81 (d,  $J = 3.4$  Hz, 1H), 5.34 (s, 1H), 5.22 (s, 1H), 4.35 – 4.15 (m, 2H), 4.11 – 3.98 (m, 1H), 3.89 – 3.77 (m, 1H), 2.92 (t,  $J = 8.5$  Hz, 1H), 2.04 (dd,  $J = 7.8, 5.3$  Hz, 1H), 1.69 (dd,  $J = 9.1, 5.3$  Hz, 1H), 1.29 (t,  $J = 7.1$  Hz, 3H), 1.03 (t,  $J = 7.1$  Hz, 3H);  $^{13}\text{C}$  NMR (100 MHz, Chloroform-*d*, TMS)  $\delta$  168.8, 166.0, 138.4, 135.4, 130.6, 129.2, 125.7, 122.0, 116.1, 108.4, 103.4, 102.3, 62.1, 62.0, 37.3, 30.8, 18.4, 14.0, 13.8; IR (EtOH):  $\nu$  2988, 2901, 2224, 1723, 1647, 1514, 1482, 1514, 1482, 1432, 1394, 1370, 1327, 1280, 1205  $\text{cm}^{-1}$ ; HRMS (ESI) Calcd. for  $\text{C}_{20}\text{H}_{20}\text{N}_2\text{O}_4\text{Na}$ : 375.1315, Found: 375.1320.

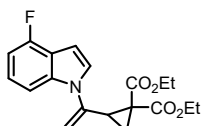

**Diethyl 2-(1-(4-fluoro-1H-indol-1-yl)vinyl)cyclopropane-1,1-dicarboxylate (3ae).** The title compound was achieved as yellow oil (29.4 mg, 85%).  $^1\text{H}$  NMR (400 MHz, Chloroform-*d*, TMS)  $\delta$  7.50 (dd,  $J = 8.6, 5.5$  Hz, 1H), 7.35 (d,  $J = 3.4$  Hz, 1H), 7.28 (dd,  $J = 10.7, 2.5$  Hz, 1H), 6.89 (td,  $J = 9.0, 2.3$  Hz, 1H), 6.55 (d,  $J = 3.4$  Hz, 1H), 5.29 (s, 1H), 5.11 (s, 1H), 4.34 – 4.13 (m, 2H), 4.12 – 4.00 (m, 1H), 3.92 – 3.82 (m, 1H), 2.91 (t,  $J = 8.5$  Hz, 1H), 2.04 (dd,  $J = 7.9, 5.3$  Hz, 1H), 1.67 (dd,  $J = 9.1, 5.3$  Hz, 1H), 1.29 (t,  $J = 7.2$  Hz, 3H), 1.03 (t,  $J = 7.1$  Hz, 3H);  $^{13}\text{C}$  NMR (100 MHz, Chloroform-*d*, TMS)  $\delta$  169.0, 166.0, 160.1 (d,  $J = 237.8$  Hz), 138.8, 135.6 (d,  $J = 12.2$  Hz), 127.1 (d,  $J = 3.9$  Hz), 125.7, 121.5 (d,  $J = 10.0$  Hz), 109.1 (d,  $J = 24.6$  Hz), 106.5, 103.6, 98.2 (d,  $J = 27.4$  Hz), 62.1, 61.9, 37.4, 31.0, 18.4, 14.0, 13.8;  $^{19}\text{F}$  NMR (376 MHz, Chloroform-*d*,  $\text{CFCl}_3$ )  $\delta$  -120.1 - -



120.2 (m); IR (EtOH):  $\nu$  2985, 1723, 1645, 1616, 1483, 1450, 1394, 1369, 1319, 1277, 1203, 1133, 1039, 1023  $\text{cm}^{-1}$ ; HRMS (ESI) Calcd. for  $\text{C}_{19}\text{H}_{20}\text{NO}_4\text{FNa}$ : 368.1269, Found: 368.1264.

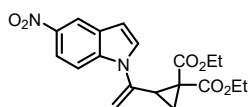

**Diethyl 2-(1-(5-nitro-1H-indol-1-yl)vinyl)cyclopropane-1,1-dicarboxylate (3af).** The title compound was achieved as yellow oil (28.8 mg, 77%).  $^1\text{H}$  NMR (400 MHz, Chloroform-*d*, TMS)  $\delta$  8.57 (d,  $J = 2.2$  Hz, 1H), 8.11 (dd,  $J = 9.2, 2.3$  Hz, 1H), 7.60 (d,  $J = 9.2$  Hz, 1H), 7.52 (d,  $J = 3.4$  Hz, 1H), 6.76 (d,  $J = 3.4$  Hz, 1H), 5.39 (s, 1H), 5.26 (s, 1H), 4.35 – 4.15 (m, 2H), 4.12 – 4.02 (m, 1H), 2.93 – 2.80 (m, 1H), 2.92 (t,  $J = 8.4$  Hz, 1H), 2.05 (dd,  $J = 7.8, 5.4$  Hz, 1H), 1.70 (dd,  $J = 9.1, 5.3$  Hz, 1H), 1.29 (t,  $J = 7.1$  Hz, 3H), 1.05 (t,  $J = 7.1$  Hz, 3H);  $^{13}\text{C}$  NMR (100 MHz, Chloroform-*d*, TMS)  $\delta$  168.7, 165.9, 142.1, 138.5, 138.4, 129.8, 128.5, 118.0, 117.8, 111.3, 109.1, 105.5, 62.2, 61.9, 37.4, 30.7, 18.4, 14.0, 13.9; IR (EtOH):  $\nu$  2982, 2930, 1726, 1651, 1515, 1464, 1394, 1369  $\text{cm}^{-1}$ ; HRMS (ESI) Calcd. for  $\text{C}_{19}\text{H}_{20}\text{N}_2\text{O}_6\text{Na}$ : 395.1214, Found: 395.1206.

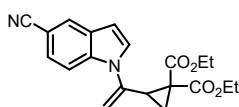

**Diethyl 2-(1-(5-cyano-1H-indol-1-yl)vinyl)cyclopropane-1,1-dicarboxylate (3ag).** The title compound was achieved as colorless oil (29.1 mg, 83%).  $^1\text{H}$  NMR (400 MHz, Chloroform-*d*, TMS)  $\delta$  7.96 (s, 1H), 7.62 (d,  $J = 8.7$  Hz, 1H), 7.49 (d,  $J = 3.4$  Hz, 1H), 7.44 (dd,  $J = 8.6, 1.6$  Hz, 1H), 6.66 (d,  $J = 3.4$  Hz, 1H), 5.35 (s, 1H), 5.23 (s, 1H), 4.34 – 4.14 (m, 2H), 4.11 – 3.99 (m, 1H), 3.90 – 3.78 (m, 1H), 2.91 (t,  $J = 8.5$  Hz, 1H), 2.04 (dd,  $J = 7.8, 5.4$  Hz, 1H), 1.69 (dd,  $J = 9.2, 5.3$  Hz, 1H), 1.29 (t,  $J = 7.1$  Hz, 3H), 1.03 (t,  $J = 7.1$  Hz, 3H);  $^{13}\text{C}$  NMR (100 MHz, Chloroform-*d*, TMS)  $\delta$  168.8, 165.9, 138.4, 137.2, 129.0, 128.9, 126.4, 125.2, 112.2, 108.7, 104.1, 103.6, 62.1, 61.9, 37.4, 30.7, 18.4, 14.0, 13.8; IR (EtOH):  $\nu$  2987, 2901, 2221, 1725, 1647, 1607, 1471, 1333  $\text{cm}^{-1}$ ; HRMS (ESI) Calcd. for  $\text{C}_{20}\text{H}_{20}\text{N}_2\text{O}_4\text{Na}$ : 375.1315, Found: 375.1309.

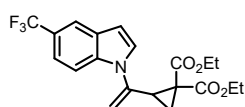

**Diethyl 2-(1-(5-(trifluoromethyl)-1H-indol-1-yl)vinyl)cyclopropane-1,1-dicarboxylate (3ah).**

The title compound was achieved as yellow oil (31.0 mg, 78%). <sup>1</sup>H NMR (400 MHz, Chloroform-*d*, TMS) δ 7.90 (s, 1H), 7.65 (d, *J* = 8.8 Hz, 1H), 7.47 (d, *J* = 3.4 Hz, 1H), 7.44 (d, *J* = 8.9 Hz, 1H), 6.66 (d, *J* = 3.4 Hz, 1H), 5.35 (s, 1H), 5.19 (s, 1H), 4.34 – 4.13 (m, 2H), 4.10 – 3.98 (m, 1H), 3.89 – 3.78 (m, 1H), 2.93 (t, *J* = 8.5 Hz, 1H), 2.05 (dd, *J* = 7.8, 5.3 Hz, 1H), 1.69 (dd, *J* = 9.1, 5.3 Hz, 1H), 1.29 (t, *J* = 7.1 Hz, 3H), 1.01 (t, *J* = 7.1 Hz, 3H); <sup>13</sup>C NMR (100 MHz, Chloroform-*d*, TMS) δ 168.9, 166.0, 143.3, 138.6, 136.9, 128.3, 125.1 (q, *J* = 271.5 Hz), 122.8 (q, *J* = 21.7 Hz), 119.0 (q, *J* = 3.6 Hz), 118.6 (q, *J* = 4.3 Hz), 111.66, 107.84, 104.22, 62.07, 61.87, 37.37, 30.87, 18.41, 14.01, 13.75; <sup>19</sup>F NMR (376 MHz, Chloroform-*d*, CFC1<sub>3</sub>) δ -60.6 (s); IR (EtOH): ν 2988, 2901, 1724, 1647, 1618, 1485, 1394, 1370, 1334, 1321, 1273, 1226, 1201 cm<sup>-1</sup>; HRMS (ESI) Calcd. for C<sub>20</sub>H<sub>20</sub>NO<sub>4</sub>F<sub>3</sub>Na: 418.1237, Found: 428.1240.

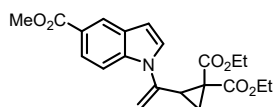

**Diethyl 2-(1-(5-(methoxycarbonyl)-1H-indol-1-yl)vinyl)cyclopropane-1,1-dicarboxylate (3ai).**

The title compound was achieved as colorless oil (31.1 mg, 81%). <sup>1</sup>H NMR (400 MHz, Chloroform-*d*, TMS) δ 8.36 (s, 1H), 7.90 (d, *J* = 8.5 Hz, 1H), 7.58 (d, *J* = 8.8 Hz, 1H), 7.42 (d, *J* = 3.3 Hz, 1H), 6.67 (d, *J* = 3.4 Hz, 1H), 5.36 (s, 1H), 5.18 (s, 1H), 4.34 – 4.14 (m, 2H), 4.10 – 3.98 (m, 1H), 3.93 (s, 3H), 3.88 – 3.75 (m, 1H), 2.94 (t, *J* = 8.6 Hz, 1H), 2.04 (dd, *J* = 7.9, 5.2 Hz, 1H), 1.68 (dd, *J* = 9.1, 5.3 Hz, 1H), 1.28 (t, *J* = 7.1 Hz, 3H), 1.01 (t, *J* = 7.1 Hz, 3H); <sup>13</sup>C NMR (100 MHz, Chloroform-*d*, TMS) δ 168.9, 167.9, 166.0, 138.6, 138.1, 128.9, 128.0, 123.8, 123.6, 122.4, 111.1, 107.8, 104.7, 62.0, 61.9, 51.9, 37.3, 30.9, 18.5, 14.0, 13.8; IR (EtOH): ν 2986, 1717, 1647, 1610, 1447, 1394, 1284, 1204 cm<sup>-1</sup>; HRMS (ESI) Calcd. for C<sub>21</sub>H<sub>23</sub>NO<sub>6</sub>Na: 408.1418, Found: 408.1411.

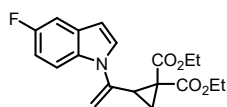

**Diethyl 2-(1-(5-fluoro-1H-indol-1-yl)vinyl)cyclopropane-1,1-dicarboxylate (3aj).**

The title compound was achieved as light green oil (26.1 mg, 76%). <sup>1</sup>H NMR (400 MHz, Chloroform-*d*, TMS) δ 7.51 (dd, *J* = 9.1, 4.4 Hz, 1H), 7.40 (d, *J* = 3.4 Hz, 1H), 7.24 (dd, *J* = 9.2, 2.4 Hz, 1H), 6.94 (td, *J* = 9.1, 2.6 Hz, 1H), 6.53 (d, *J* = 3.3 Hz, 1H), 5.30 (s, 1H), 5.10 (s, 1H), 4.34 – 4.13 (m, 2H), 4.09 – 3.97 (m, 1H), 3.89 – 3.78 (m, 1H), 2.93 (t, *J* = 8.5 Hz, 1H), 2.04 (dd, *J* = 7.8, 5.3 Hz, 1H),

1.67 (dd,  $J = 9.1, 5.3$  Hz, 1H), 1.29 (t,  $J = 7.1$  Hz, 3H), 1.01 (t,  $J = 7.1$  Hz, 3H);  $^{13}\text{C}$  NMR (100 MHz, Chloroform-*d*, TMS)  $\delta$  169.0, 166.0, 158.1 (d,  $J = 235.9$  Hz), 138.8, 132.2, 129.8 (d,  $J = 10.1$  Hz), 128.0, 112.2 (d,  $J = 9.5$  Hz), 110.5 (d,  $J = 26.0$  Hz), 106.4, 105.7 (d,  $J = 23.4$  Hz), 103.4 (d,  $J = 4.5$  Hz), 62.0, 61.8, 37.3, 31.0, 18.4, 14.0, 13.8;  $^{19}\text{F}$  NMR (376 MHz, Chloroform-*d*,  $\text{CFCl}_3$ )  $\delta$  -124.1 - -124.2 (m); IR (EtOH):  $\nu$  2988, 2901, 1725, 1646, 1474, 1448, 1405, 1394, 1319, 1280, 1250, 1206, 1134, 1075, 1066, 1057  $\text{cm}^{-1}$ ; HRMS (ESI) Calcd. for  $\text{C}_{19}\text{H}_{20}\text{NO}_4\text{FNa}$ : 368.1269, Found: 368.1272.

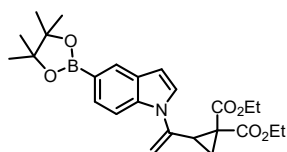

**Diethyl 2-(1-(5-(4,4,5,5-tetramethyl-1,3,2-dioxaborolan-2-yl)-1H-indol-1-yl)vinyl)cyclopropane-1,1-dicarboxylate (3ak).** The title compound was achieved as colorless oil (34.4 mg, 76%).  $^1\text{H}$  NMR (400 MHz, Chloroform-*d*, TMS)  $\delta$  8.13 (s, 1H), 7.65 (d,  $J = 8.2$  Hz, 1H), 7.57 (d,  $J = 8.4$  Hz, 1H), 7.35 (d,  $J = 3.4$  Hz, 1H), 6.58 (d,  $J = 3.4$  Hz, 1H), 5.33 (s, 1H), 5.11 (s, 1H), 4.33 – 4.13 (m, 2H), 4.10 – 3.99 (m, 1H), 3.90 – 3.78 (m, 1H), 2.94 (t,  $J = 8.5$  Hz, 1H), 2.04 (dd,  $J = 7.8, 5.2$  Hz, 1H), 1.66 (dd,  $J = 9.1, 5.3$  Hz, 1H), 1.28 (t,  $J = 7.2$  Hz, 3H), 1.00 (t,  $J = 7.1$  Hz, 3H);  $^{13}\text{C}$  NMR (100 MHz, Chloroform-*d*, TMS)  $\delta$  169.1, 166.1, 138.7, 137.6, 129.1, 128.8, 128.5, 126.8, 110.9, 106.7, 104.1, 83.5, 62.0, 61.8, 37.4, 31.0, 24.9, 18.4, 14.1, 13.8;  $^{11}\text{B}$  NMR (128 MHz, Chloroform-*d*)  $\delta$  31.0 (br. s); IR (EtOH):  $\nu$  2987, 2901, 1727, 1644, 1607, 1521, 1436, 1393, 1370, 1356, 1320, 1298, 1278, 1205, 1135, 1074, 1066, 1027  $\text{cm}^{-1}$ ; HRMS (ESI) Calcd. for  $\text{C}_{25}\text{H}_{32}\text{BNO}_6\text{Na}$ : 476.2215, Found: 476.2220.

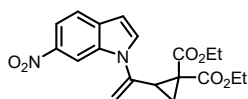

**Diethyl 2-(1-(6-nitro-1H-indol-1-yl)vinyl)cyclopropane-1,1-dicarboxylate (3al).** The title compound was achieved as yellow oil (29.2 mg, 78%).  $^1\text{H}$  NMR (400 MHz, Chloroform-*d*, TMS)  $\delta$  8.55 (s, 1H), 8.04 (dd,  $J = 8.8, 2.0$  Hz, 1H), 7.67 (d,  $J = 6.1$  Hz, 1H), 7.65 (s, 1H), 6.69 (d,  $J = 3.3$  Hz, 1H), 5.39 (s, 1H), 5.24 (s, 1H), 4.36 – 4.17 (m, 3H), 4.18 – 4.07 (m, 1H), 4.01 – 3.89 m, 1H), 2.89 (t,  $J = 8.0$  Hz, 1H), 2.07 (dd,  $J = 7.8, 5.4$  Hz, 1H), 1.72 (dd,  $J = 9.0, 5.4$  Hz, 1H), 1.30 (t,  $J = 7.1$  Hz, 3H), 1.08 (t,  $J = 7.1$  Hz, 3H);  $^{13}\text{C}$  NMR (100 MHz, Chloroform-*d*, TMS)  $\delta$  168.8, 165.9,

143.6, 138.3, 134.3, 134.0, 132.2, 120.9, 115.9, 108.5, 108.4, 104.1, 62.2, 62.0, 37.7, 30.7, 18.3, 14.0, 13.9; IR (EtOH):  $\nu$  2988, 2901, 1723, 1647, 1519, 1503, 1406, 1394, 1370, 1278, 1233, 1206, 1133, 1066  $\text{cm}^{-1}$ ; HRMS (ESI) Calcd. for  $\text{C}_{19}\text{H}_{20}\text{N}_2\text{O}_6\text{Na}$ : 395.1214, Found: 395.1215.

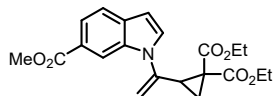

**Diethyl 2-(1-(6-(methoxycarbonyl)-1H-indol-1-yl)vinyl)cyclopropane-1,1-dicarboxylate (3am).**

The title compound was achieved as colorless oil (30.9 mg, 80%).  $^1\text{H}$  NMR (400 MHz, Chloroform-*d*, TMS)  $\delta$  8.32 (s, 1H), 7.83 (d,  $J = 8.3$  Hz, 1H), 7.63 (d,  $J = 8.3$  Hz, 1H), 7.53 (d,  $J = 3.3$  Hz, 1H), 6.62 (d,  $J = 3.3$  Hz, 1H), 5.40 (s, 1H), 5.20 (s, 1H), 4.34 – 4.13 (m, 2H), 4.14 – 4.02 (m, 1H), 3.93 (s, 3H), 3.92 – 3.84 (m, 1H), 2.93 (t,  $J = 8.4$  Hz, 1H), 2.06 (dd,  $J = 7.8, 5.3$  Hz, 1H), 1.69 (dd,  $J = 9.1, 5.3$  Hz, 1H), 1.28 (t,  $J = 7.1$  Hz, 3H), 1.03 (t,  $J = 7.1$  Hz, 3H);  $^{13}\text{C}$  NMR (100 MHz, Chloroform-*d*, TMS)  $\delta$  168.9, 168.0, 166.0, 138.3, 135.1, 132.9, 129.7, 124.0, 121.5, 120.5, 113.7, 107.8, 103.7, 62.0, 61.9, 51.9, 37.5, 31.0, 18.3, 14.0, 13.8; IR (EtOH):  $\nu$  2981, 1716, 1646, 1610, 1509, 1448, 1369, 1323, 1281, 1253, 1229, 1204, 1169, 1130, 1098  $\text{cm}^{-1}$ ; HRMS (ESI) Calcd. for  $\text{C}_{21}\text{H}_{23}\text{NO}_6\text{Na}$ : 408.1418, Found: 408.1420.

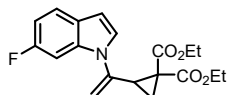

**Diethyl 2-(1-(6-fluoro-1H-indol-1-yl)vinyl)cyclopropane-1,1-dicarboxylate (3an).**

The title compound was achieved as yellow oil (29.9 mg, 87%).  $^1\text{H}$  NMR (400 MHz, Chloroform-*d*, TMS)  $\delta$  7.50 (dd,  $J = 8.6, 5.5$  Hz, 1H), 7.35 (d,  $J = 3.4$  Hz, 1H), 7.28 (dd,  $J = 10.4, 2.3$  Hz, 1H), 6.89 (td,  $J = 9.0, 2.3$  Hz, 1H), 6.55 (d,  $J = 3.4$  Hz, 1H), 5.29 (s, 1H), 5.11 (s, 1H), 4.34 – 4.13 (m, 2H), 4.13 – 4.00 (m, 1H), 3.93 – 1.81 (m, 1H), 2.91 (t,  $J = 8.5$  Hz, 1H), 2.04 (dd,  $J = 7.9, 5.3$  Hz, 1H), 1.67 (dd,  $J = 9.2, 5.2$  Hz, 1H), 1.29 (t,  $J = 7.2$  Hz, 3H), 1.03 (t,  $J = 7.1$  Hz, 3H);  $^{13}\text{C}$  NMR (100 MHz, Chloroform-*d*, TMS)  $\delta$  169.0, 166.0, 160.1 (d,  $J = 237.7$  Hz), 138.8, 135.6 (d,  $J = 12.3$  Hz), 128.7 (d,  $J = 57.6$  Hz), 127.0 (d,  $J = 3.8$  Hz), 125.7, 121.5 (d,  $J = 10.0$  Hz), 109.1 (d,  $J = 24.5$  Hz), 106.5, 103.6, 98.2 (d,  $J = 27.5$  Hz), 62.1, 61.9, 37.4, 31.0, 18.4, 14.0, 13.8;  $^{19}\text{F}$  NMR (376 MHz, Chloroform-*d*,  $\text{CFCl}_3$ )  $\delta$  -120.19 (ddd,  $J = 15.0, 9.8, 5.5$  Hz); IR (EtOH):  $\nu$  2988, 2901, 1723, 1646, 1616, 1582, 1483, 1450, 1394, 1370, 1320, 1277, 1203, 1097, 1076, 1066, 1044  $\text{cm}^{-1}$ ; HRMS (ESI)

Calcd. for C<sub>19</sub>H<sub>20</sub>NO<sub>4</sub>FNa: 368.1269, Found: 368.1273.

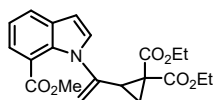

**Diethyl 2-(1-(7-(methoxycarbonyl)-1H-indol-1-yl)vinyl)cyclopropane-1,1-dicarboxylate (3ao).**

The title compound was achieved as yellow oil (13.1 mg, 34%). <sup>1</sup>H NMR (400 MHz, Chloroform-*d*, TMS) δ 7.76 (d, *J* = 7.8 Hz, 1H), 7.61 (d, *J* = 7.4 Hz, 1H), 7.29 (d, *J* = 3.3 Hz, 1H), 7.16 (t, *J* = 7.6 Hz, 1H), 6.61 (d, *J* = 3.4 Hz, 1H), 5.04 (s, 1H), 5.01 (s, 1H), 4.29 – 4.07 (m, 4H), 3.89 (s, 3H), 2.91 (t, *J* = 8.7 Hz, 1H), 1.81 (dd, *J* = 8.1, 5.3 Hz, 1H), 1.63 (dd, *J* = 9.2, 5.2 Hz, 1H), 1.27 (t, *J* = 7.1 Hz, 3H), 1.23 (t, *J* = 7.1 Hz, 3H); <sup>13</sup>C NMR (100 MHz, Chloroform-*d*, TMS) δ 168.9, 168.0, 166.2, 141.8, 132.9, 130.9, 130.1, 125.3, 124.7, 119.6, 116.9, 108.5, 103.4, 61.9, 61.8, 51.6, 37.9, 31.2, 18.0, 14.1, 14.0; IR (EtOH): ν 2988, 2901, 1720, 1648, 1435, 1405, 1394, 1370, 1316, 1275, 1197, 1132, 1066 cm<sup>-1</sup>; HRMS (ESI) Calcd. for C<sub>21</sub>H<sub>23</sub>NO<sub>6</sub>Na: 408.1418, Found: 408.1411.

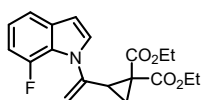

**Diethyl 2-(1-(7-fluoro-1H-indol-1-yl)vinyl)cyclopropane-1,1-dicarboxylate (3ap).**

The title compound was achieved as yellow oil (32.7 mg, 95%). <sup>1</sup>H NMR (400 MHz, Chloroform-*d*, TMS) δ 7.37 (d, *J* = 7.8 Hz, 1H), 7.17 (d, *J* = 3.2 Hz, 1H), 7.04 (td, *J* = 7.8, 4.3 Hz, 1H), 6.90 (dd, *J* = 12.7, 7.8 Hz, 1H), 6.56 (t, *J* = 2.7 Hz, 1H), 5.25 (d, *J* = 3.8 Hz, 1H), 5.19 (s, 1H), 4.29 – 4.15 (m, 3H), 4.09 – 3.97 (m, 1H), 3.08 (t, *J* = 8.6 Hz, 1H), 1.88 (dd, *J* = 7.9, 5.3 Hz, 1H), 1.65 (dd, *J* = 9.3, 5.2 Hz, 1H), 1.26 (t, *J* = 7.1 Hz, 3H), 1.16 (t, *J* = 7.1 Hz, 3H); <sup>13</sup>C NMR (100 MHz, Chloroform-*d*, TMS) δ 169.0, 166.4, 149.5 (d, *J* = 246.5 Hz), 139.7 (d, *J* = 1.7 Hz), 133.1 (d, *J* = 4.7 Hz), 129.2, 128.7 (d, *J* = 57.7 Hz), 120.6 (d, *J* = 6.8 Hz), 116.7 (d, *J* = 3.5 Hz), 111.3 (d, *J* = 4.0 Hz), 108.3 (d, *J* = 18.8 Hz), 103.6 (d, *J* = 2.0 Hz), 61.8, 61.7, 37.5, 31.3 (d, *J* = 5.7 Hz), 18.7, 14.0, 13.9; <sup>19</sup>F NMR (376 MHz, Chloroform-*d*, CFC<sub>l</sub><sub>3</sub>) δ -126.97 (d, *J* = 13.0 Hz); IR (EtOH): ν 2988, 2901, 1723, 1650, 1488, 1438, 1405, 1394, 1370, 1319, 1275, 1235, 1204, 1131, 1065, 1049 cm<sup>-1</sup>; HRMS (ESI) Calcd. for C<sub>19</sub>H<sub>20</sub>NO<sub>4</sub>FNa: 368.1269, Found: 368.1273.

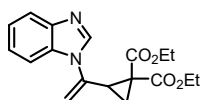

**Diethyl 2-(1-(1H-benzo[d]imidazol-1-yl)vinyl)cyclopropane-1,1-dicarboxylate (3aq).** The title compound was achieved as colorless oil (31.0 mg, 94%). <sup>1</sup>H NMR (400 MHz, Chloroform-*d*, TMS) δ 8.19 (s, 1H), 7.86 – 7.79 (m, 1H), 7.62 – 7.55 (m, 1H), 7.37 – 7.28 (m, 2H), 5.46 (s, 1H), 5.20 (s, 1H), 4.35 – 4.15 (m, 2H), 4.12 – 4.01 (m, 1H), 3.93 – 3.80 (m, 1H), 2.97 (t, *J* = 8.4 Hz, 1H), 2.05 (dd, *J* = 7.7, 5.4 Hz, 1H), 1.73 (dd, *J* = 9.1, 5.4 Hz, 1H), 1.29 (t, *J* = 7.1 Hz, 3H), 1.01 (t, *J* = 7.1 Hz, 3H); <sup>13</sup>C NMR (100 MHz, Chloroform-*d*, TMS) δ 168.6, 165.9, 143.8, 141.7, 136.9, 132.9, 123.7, 122.9, 120.5, 111.4, 108.2, 62.2, 62.0, 37.4, 30.3, 18.2, 14.0, 13.7; IR (EtOH): ν 2988, 2901, 1728, 1648, 1496, 1455, 1370, 1209 cm<sup>-1</sup>; HRMS (ESI) Calcd. for C<sub>18</sub>H<sub>21</sub>N<sub>2</sub>O<sub>4</sub>: 329.1496, Found: 329.1497.

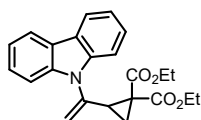

**Diethyl 2-(1-(9H-carbazol-9-yl)vinyl)cyclopropane-1,1-dicarboxylate (3ar).** The title compound was achieved as yellow oil (19.2 mg, 51%). <sup>1</sup>H NMR (400 MHz, Chloroform-*d*, TMS) δ 8.06 (d, *J* = 7.7 Hz, 2H), 7.51 (d, *J* = 8.2 Hz, 2H), 7.48 – 7.38 (m, 2H), 7.29 – 7.21 (m, 2H), 5.58 (s, 1H), 5.48 (s, 1H), 4.23 – 4.06 (m, 2H), 4.04 – 3.95 (m, 1H), 3.85 – 3.73 (m, 1H), 3.16 (t, *J* = 8.8 Hz, 1H), 1.91 (dd, *J* = 8.1, 5.1 Hz, 1H), 1.66 (dd, *J* = 9.3, 5.1 Hz, 1H), 1.22 (t, *J* = 7.1 Hz, 3H), 1.01 (t, *J* = 7.1 Hz, 3H); <sup>13</sup>C NMR (100 MHz, Chloroform-*d*, TMS) δ 169.1, 166.4, 140.0, 138.2, 125.8, 123.5, 120.1, 119.9, 114.5, 110.8, 61.9, 61.8, 37.7, 30.7, 20.2, 14.0, 13.7; IR (EtOH): ν 2988, 2901, 1717, 1451, 1406, 1394, 1229, 1066 cm<sup>-1</sup>; HRMS (ESI) Calcd. for C<sub>23</sub>H<sub>23</sub>NO<sub>4</sub>Na: 400.1519, Found: 400.1515.

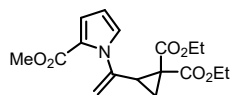

**Diethyl 2-(1-(2-(methoxycarbonyl)-1H-pyrrol-1-yl)vinyl)cyclopropane-1,1-dicarboxylate (3as).** The title compound was achieved as yellow oil (32.7 mg, 98%). <sup>1</sup>H NMR (400 MHz, Chloroform-*d*, TMS) δ 6.99 (dd, *J* = 3.9, 1.8 Hz, 1H), 6.71 (t, *J* = 2.2 Hz, 1H), 6.13 (dd, *J* = 3.9, 2.6 Hz, 1H), 5.21 (s, 1H), 5.19 (s, 1H), 4.30 – 4.05 (m, 4H), 3.82 (s, 3H), 3.14 (t, *J* = 8.8 Hz, 1H), 1.73 (dd, *J* = 8.0, 5.1 Hz, 1H), 1.59 (dd, *J* = 9.4, 5.2 Hz, 1H), 1.26 (t, *J* = 6.9 Hz, 3H), 1.24 (t, *J* = 6.9 Hz, 3H); <sup>13</sup>C

NMR (100 MHz, Chloroform-*d*, TMS)  $\delta$  168.9, 166.8, 160.9, 142.2, 129.5, 122.4, 118.8, 113.2, 108.5, 61.7, 61.6, 51.2, 37.3, 31.7, 18.9, 14.03, 13.96; IR (EtOH):  $\nu$  2984, 2899, 1709, 1652, 1532, 1439, 1413, 1263  $\text{cm}^{-1}$ ; HRMS (ESI) Calcd. for  $\text{C}_{17}\text{H}_{21}\text{NO}_6\text{Na}$ : 358.1261, Found: 358.1255.

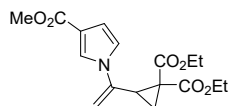

**Diethyl 2-(1-(3-(methoxycarbonyl)-1H-pyrrol-1-yl)vinyl)cyclopropane-1,1-dicarboxylate (3at).**

The title compound was achieved as yellow oil (21.4 mg, 64%).  $^1\text{H}$  NMR (400 MHz, Chloroform-*d*, TMS)  $\delta$  7.61 (s, 1H), 6.95 (t,  $J = 2.7$  Hz, 1H), 6.62 (s, 1H), 5.19 (s, 1H), 4.75 (s, 1H), 4.38 – 4.18 (m, 2H), 4.08 – 3.96 (m, 2H), 3.81 (s, 3H), 2.87 (t,  $J = 8.4$  Hz, 1H), 2.00 (dd,  $J = 7.7, 5.4$  Hz, 1H), 1.66 (dd,  $J = 9.0, 5.3$  Hz, 1H), 1.32 (t,  $J = 7.1$  Hz, 3H), 1.02 (t,  $J = 7.1$  Hz, 3H);  $^{13}\text{C}$  NMR (100 MHz, Chloroform-*d*, TMS)  $\delta$  168.8, 165.9, 165.0, 139.3, 123.8, 119.9, 117.2, 110.9, 102.5, 62.2, 61.8, 51.2, 36.9, 29.1, 17.8, 14.0, 13.7; IR (EtOH):  $\nu$  2987, 2901, 1720, 1644, 1547, 1495, 1406, 1066  $\text{cm}^{-1}$ ; HRMS (ESI) Calcd. for  $\text{C}_{17}\text{H}_{21}\text{NO}_6\text{Na}$ : 358.1261, Found: 358.1256.

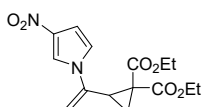

**Diethyl 2-(1-(3-nitro-1H-pyrrol-1-yl)vinyl)cyclopropane-1,1-dicarboxylate (3au).** The title compound was achieved as yellow oil (20.9 mg, 65%).  $^1\text{H}$  NMR (400 MHz, Chloroform-*d*, TMS)  $\delta$  7.85 (t,  $J = 2.1$  Hz, 1H), 6.94 (t,  $J = 3.0$  Hz, 1H), 6.80 – 6.77 (dd,  $J = 3.4, 1.8$  Hz, 1H), 5.29 (d,  $J = 2.2$  Hz, 1H), 4.90 (s, 1H), 4.39 – 4.20 (m, 1H), 4.14 – 3.98 (m, 2H), 2.82 (t,  $J = 8.4$  Hz, 1H), 2.01 (dd,  $J = 7.7, 5.5$  Hz, 1H), 1.71 (dd,  $J = 9.0, 5.4$  Hz, 1H), 1.33 (t,  $J = 7.1$  Hz, 3H), 1.07 (t,  $J = 7.1$  Hz, 3H);  $^{13}\text{C}$  NMR (100 MHz, Chloroform-*d*, TMS)  $\delta$  168.5, 165.7, 139.0, 119.6, 119.5, 62.4, 62.0, 37.0, 28.7, 17.7, 14.0, 13.8; IR (EtOH):  $\nu$  2983, 2930, 1724, 1652, 1537, 1497, 1310, 1291  $\text{cm}^{-1}$ ; HRMS (ESI) Calcd. for  $\text{C}_{15}\text{H}_{18}\text{N}_2\text{O}_6\text{Na}$ : 345.1057, Found: 345.1059.

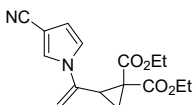

**Diethyl 2-(1-(3-cyano-1H-pyrrol-1-yl)vinyl)cyclopropane-1,1-dicarboxylate (3av).** The title compound was achieved as yellow oil (23.0 mg, 76%).  $^1\text{H}$  NMR (400 MHz, Chloroform-*d*, TMS)  $\delta$

7.48 (s, 1H), 6.99 (s, 1H), 6.47 (s, 1H), 5.21 (s, 1H), 4.82 (s, 1H), 4.39 – 4.16 (m, 2H), 4.12 – 3.95 (m, 2H), 2.83 (t,  $J = 8.4$  Hz, 1H), 2.01 (t,  $J = 6.5$  Hz, 1H), 1.67 (dd,  $J = 8.8, 5.9$  Hz, 1H), 1.32 (t,  $J = 7.2$  Hz, 3H), 1.05 (t,  $J = 7.1$  Hz, 3H);  $^{13}\text{C}$  NMR (100 MHz, Chloroform-*d*, TMS)  $\delta$  168.6, 165.7, 138.8, 126.0, 120.1, 116.2, 112.7, 103.6, 94.5, 62.3, 61.9, 36.9, 28.9, 17.7, 14.0, 13.8; IR (EtOH):  $\nu$  2983, 2938, 2227, 1723, 1651, 1538, 1500, 1280, 1203  $\text{cm}^{-1}$ ; HRMS (ESI) Calcd. for  $\text{C}_{16}\text{H}_{18}\text{N}_2\text{O}_4\text{Na}$ : 325.1159, Found: 325.1164.

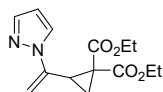

**Diethyl 2-(1-(1H-pyrazol-1-yl)vinyl)cyclopropane-1,1-dicarboxylate (3aw).** The title compound was achieved as colorless oil (14.4 mg, 52%).  $^1\text{H}$  NMR (400 MHz, Chloroform-*d*, TMS)  $\delta$  7.78 (d,  $J = 2.5$  Hz, 1H), 7.60 (s, 1H), 6.34 (s, 1H), 5.72 (s, 1H), 4.76 (s, 1H), 4.37 – 4.14 (m, 2H), 3.99 (q,  $J = 7.1$  Hz, 2H), 3.02 (t,  $J = 8.5$  Hz, 1H), 2.06 (dd,  $J = 7.8, 5.3$  Hz, 1H), 1.69 (dd,  $J = 9.1, 5.3$  Hz, 1H), 1.31 (t,  $J = 7.1$  Hz, 3H), 0.96 (t,  $J = 7.1$  Hz, 3H);  $^{13}\text{C}$  NMR (100 MHz, Chloroform-*d*, TMS)  $\delta$  169.1, 166.0, 140.7, 138.9, 127.5, 106.6, 101.8, 62.1, 61.6, 36.6, 28.4, 17.8, 14.0, 13.7; IR (EtOH):  $\nu$  2987, 2894, 1724, 1651, 1520, 1394, 1315, 1207, 1133  $\text{cm}^{-1}$ ; HRMS (ESI) Calcd. for  $\text{C}_{14}\text{H}_{18}\text{N}_2\text{O}_4\text{Na}$ : 301.1159, Found: 301.1160.



### (E) Spectroscopic Data of Products (NMR Spectra).

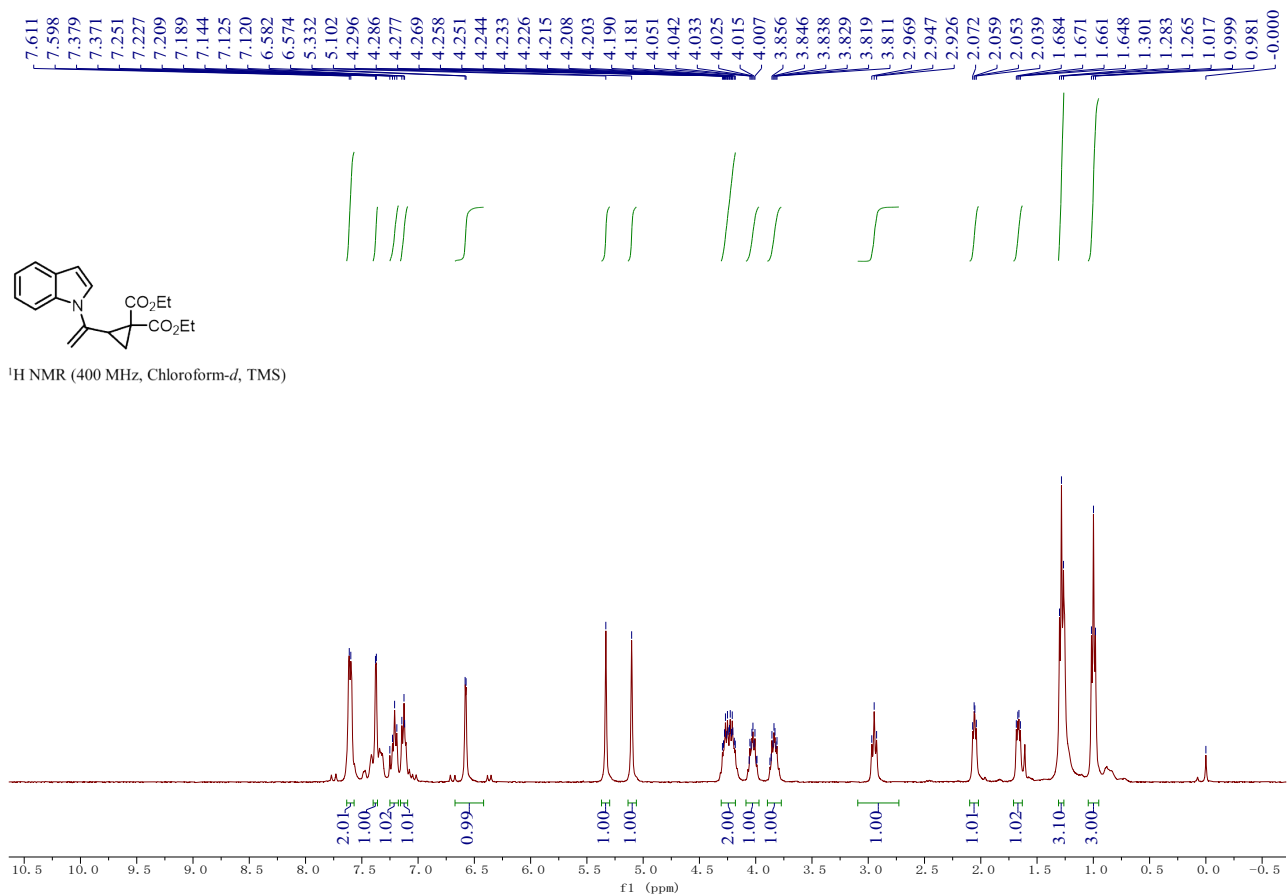

$\delta$  169.032  
 $\delta$  166.068  
  
 $\delta$  138.686  
 $\delta$  135.574  
 $\delta$  126.515  
 $\delta$  122.256  
 $\delta$  120.894  
 $\delta$  120.379  
 $\delta$  111.479  
 $\delta$  106.176  
 $\delta$  103.454  
  
 $\delta$  77.319  
 $\delta$  77.002  
 $\delta$  76.685  
  
 $\delta$  61.935  
 $\delta$  61.775  
  
 $\delta$  37.345  
 $\delta$  31.104  
  
 $\delta$  18.322  
 $\delta$  14.018  
 $\delta$  13.737

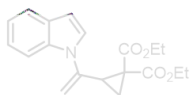

$^{13}\text{C}$  NMR (100 MHz, Chloroform-*d*, TMS)

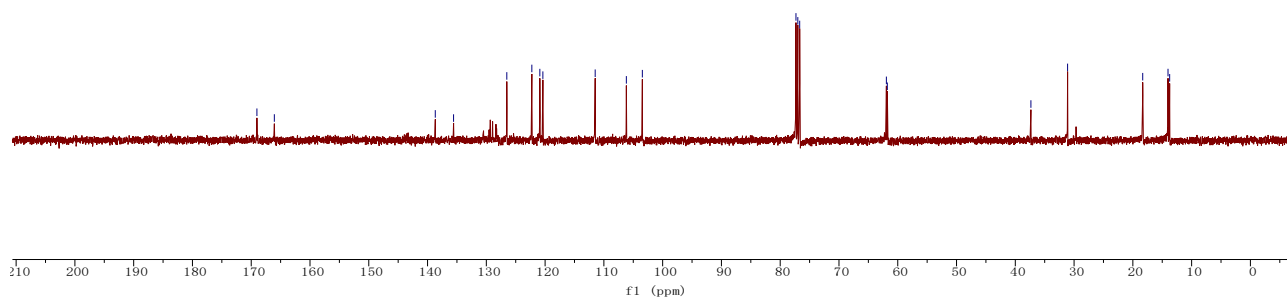

$\delta$  7.652  
 $\delta$  7.631  
 $\delta$  7.614  
 $\delta$  7.595  
 $\delta$  7.408  
 $\delta$  7.400  
 $\delta$  7.255  
 $\delta$  7.224  
 $\delta$  7.206  
 $\delta$  7.203  
 $\delta$  7.186  
 $\delta$  7.142  
 $\delta$  7.123  
 $\delta$  7.105  
 $\delta$  6.572  
 $\delta$  6.563  
 $\delta$  5.315  
 $\delta$  5.156  
 $\delta$  5.140  
 $\delta$  5.124  
 $\delta$  5.109  
 $\delta$  5.093  
 $\delta$  5.077  
 $\delta$  5.051  
 $\delta$  4.895  
 $\delta$  4.880  
 $\delta$  4.864  
 $\delta$  4.848  
 $\delta$  4.833  
 $\delta$  4.817  
 $\delta$  4.802  
  
 $\delta$  2.898  
 $\delta$  2.877  
 $\delta$  2.856  
 $\delta$  2.038  
 $\delta$  2.025  
 $\delta$  2.018  
 $\delta$  2.006  
 $\delta$  1.636  
 $\delta$  1.623  
 $\delta$  1.613  
 $\delta$  1.599  
 $\delta$  1.306  
 $\delta$  1.290  
 $\delta$  1.274  
 $\delta$  1.258  
 $\delta$  1.198  
 $\delta$  1.183  
 $\delta$  0.851  
 $\delta$  0.836  
 $\delta$  0.001

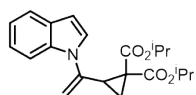

$^1\text{H}$  NMR (400 MHz, Chloroform-*d*, TMS)

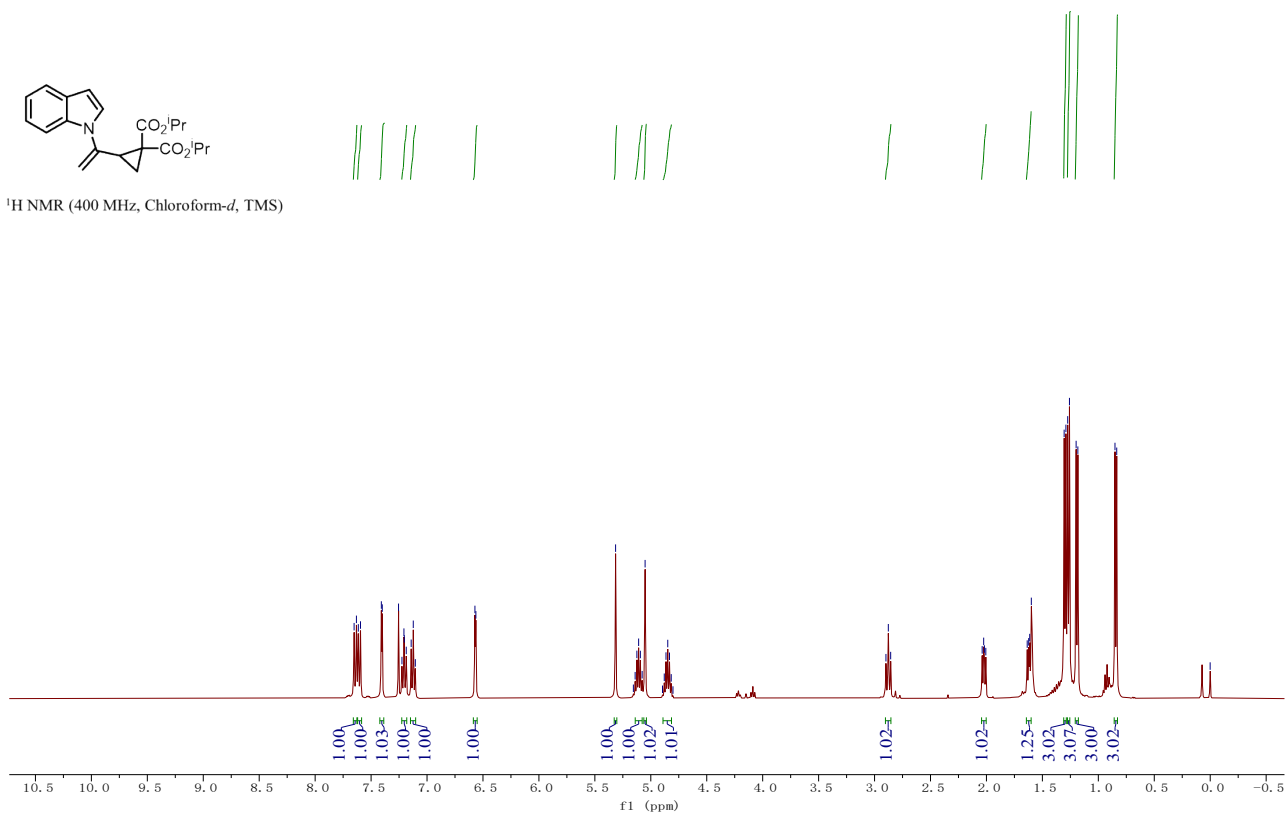

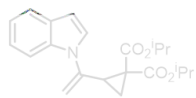

<sup>13</sup>C NMR (100 MHz, Chloroform-*d*, TMS)

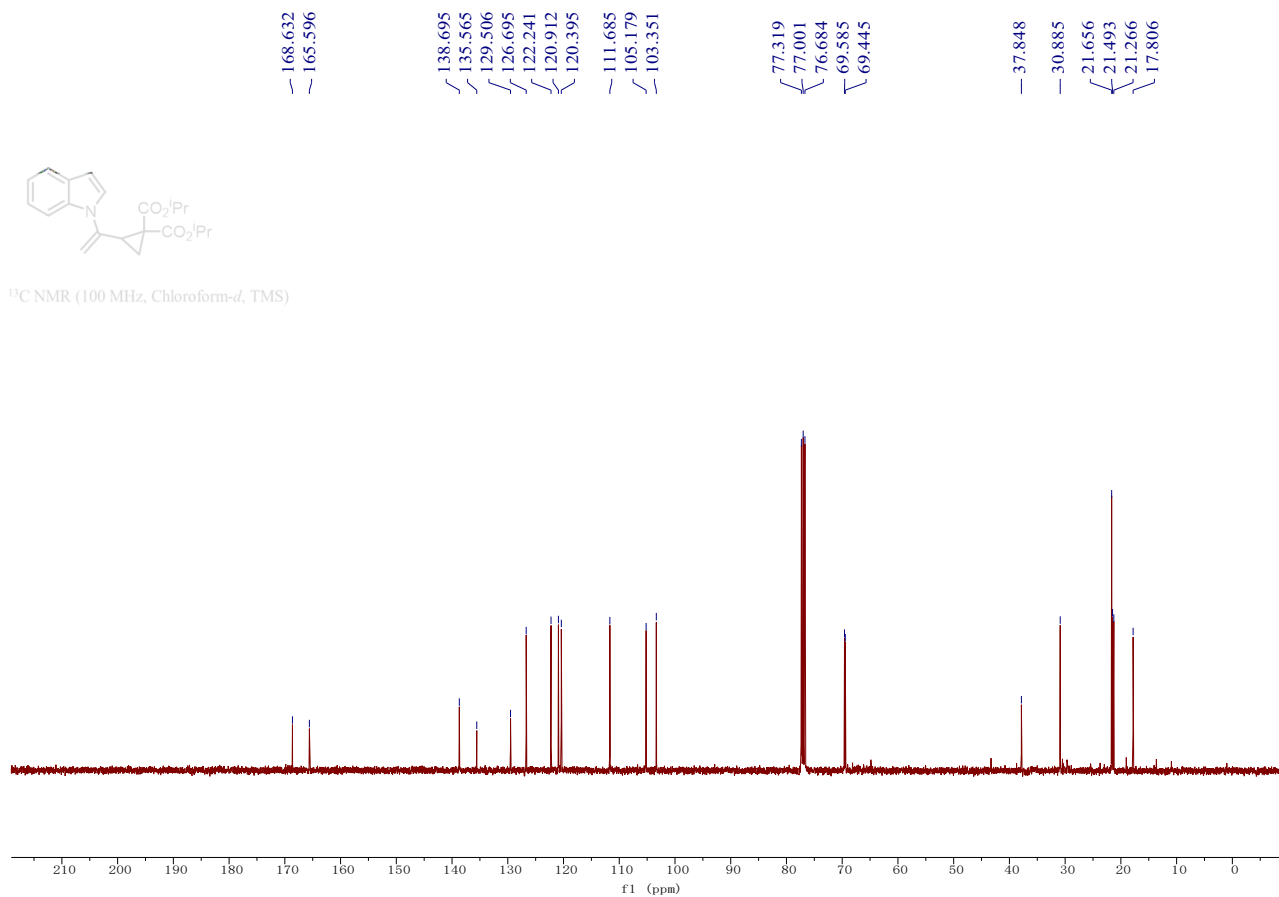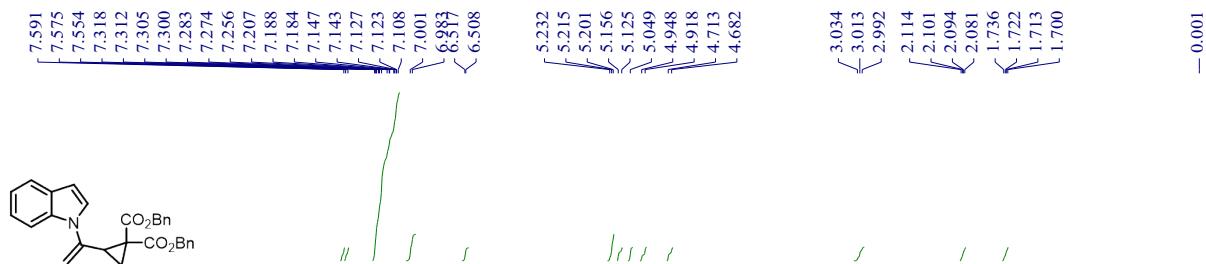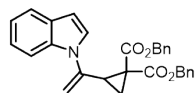

<sup>1</sup>H NMR (400 MHz, Chloroform-*d*, TMS)

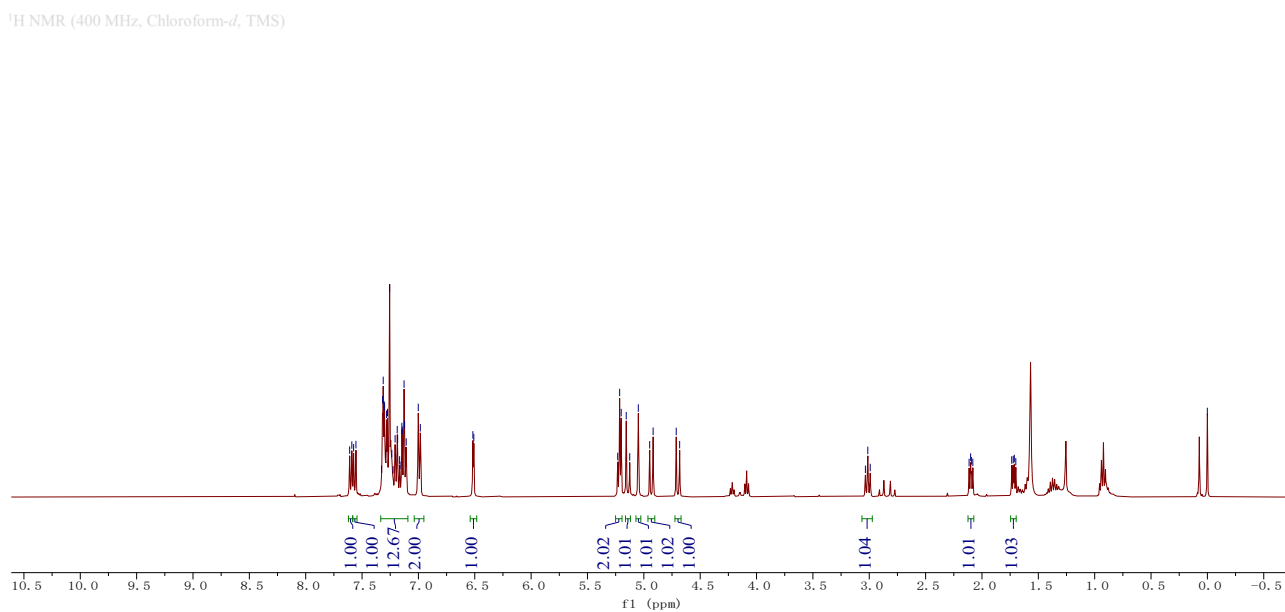

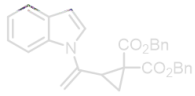

<sup>13</sup>C NMR (100 MHz, Chloroform-*d*, TMS)

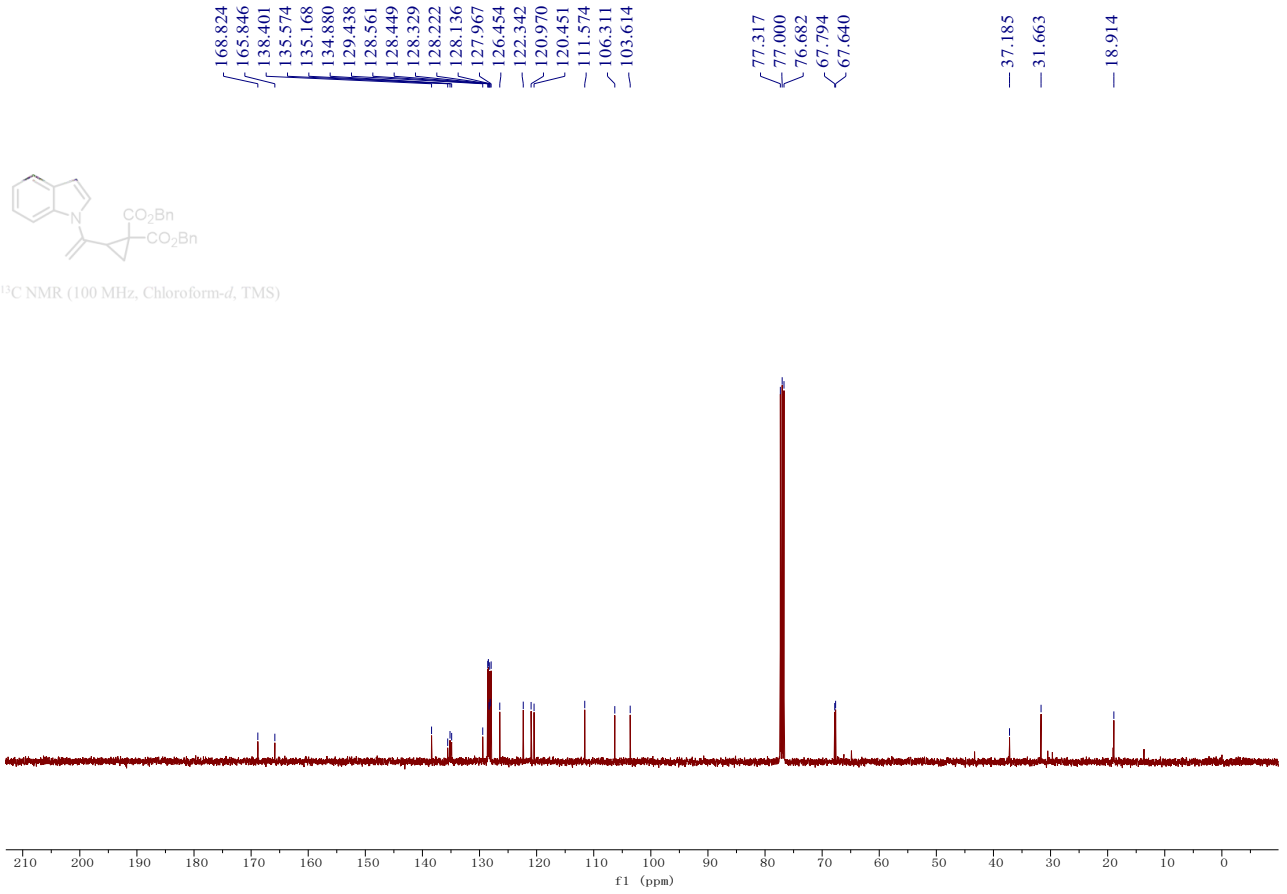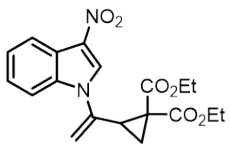

<sup>1</sup>H NMR (400 MHz, Chloroform-*d*, TMS)

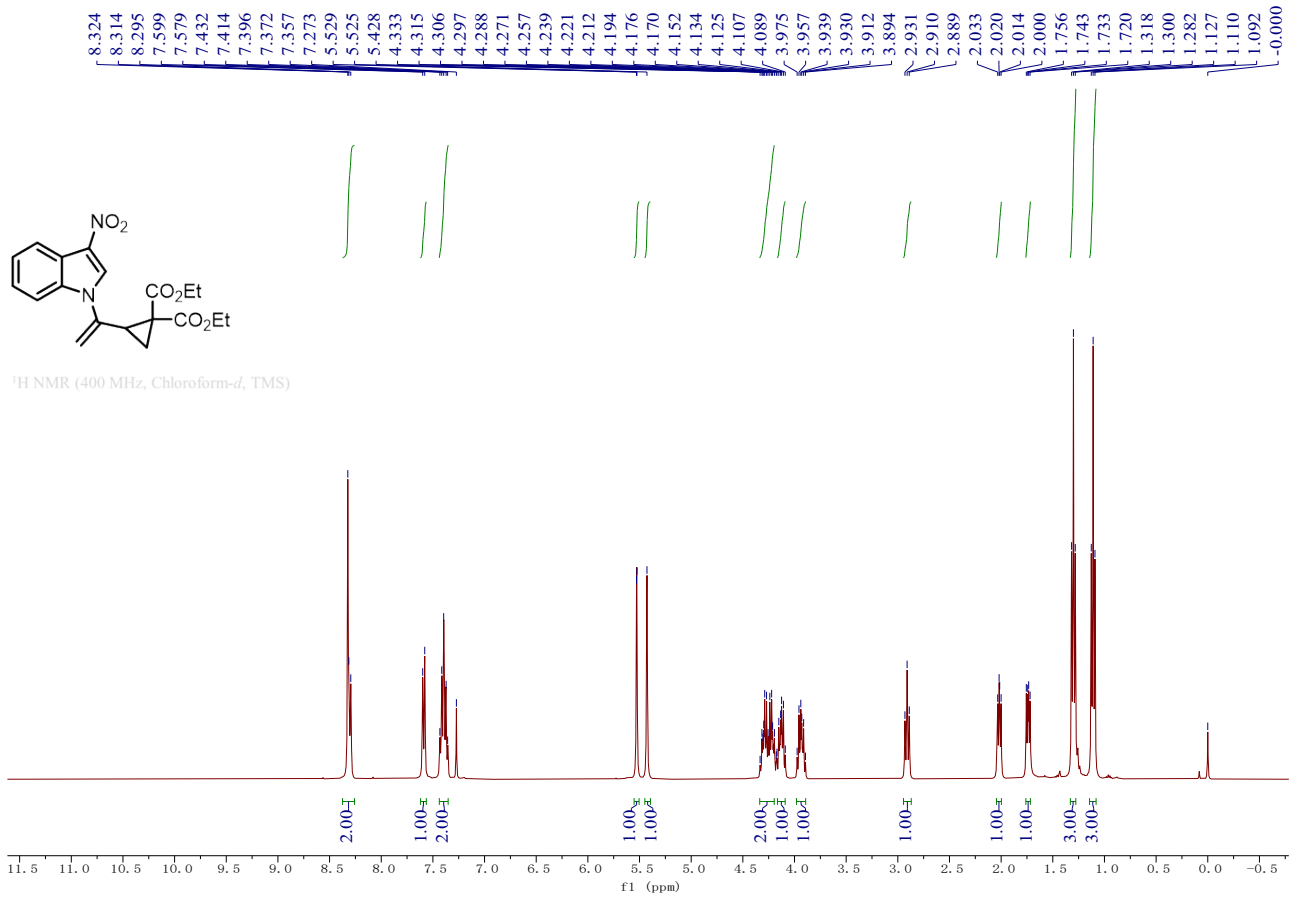

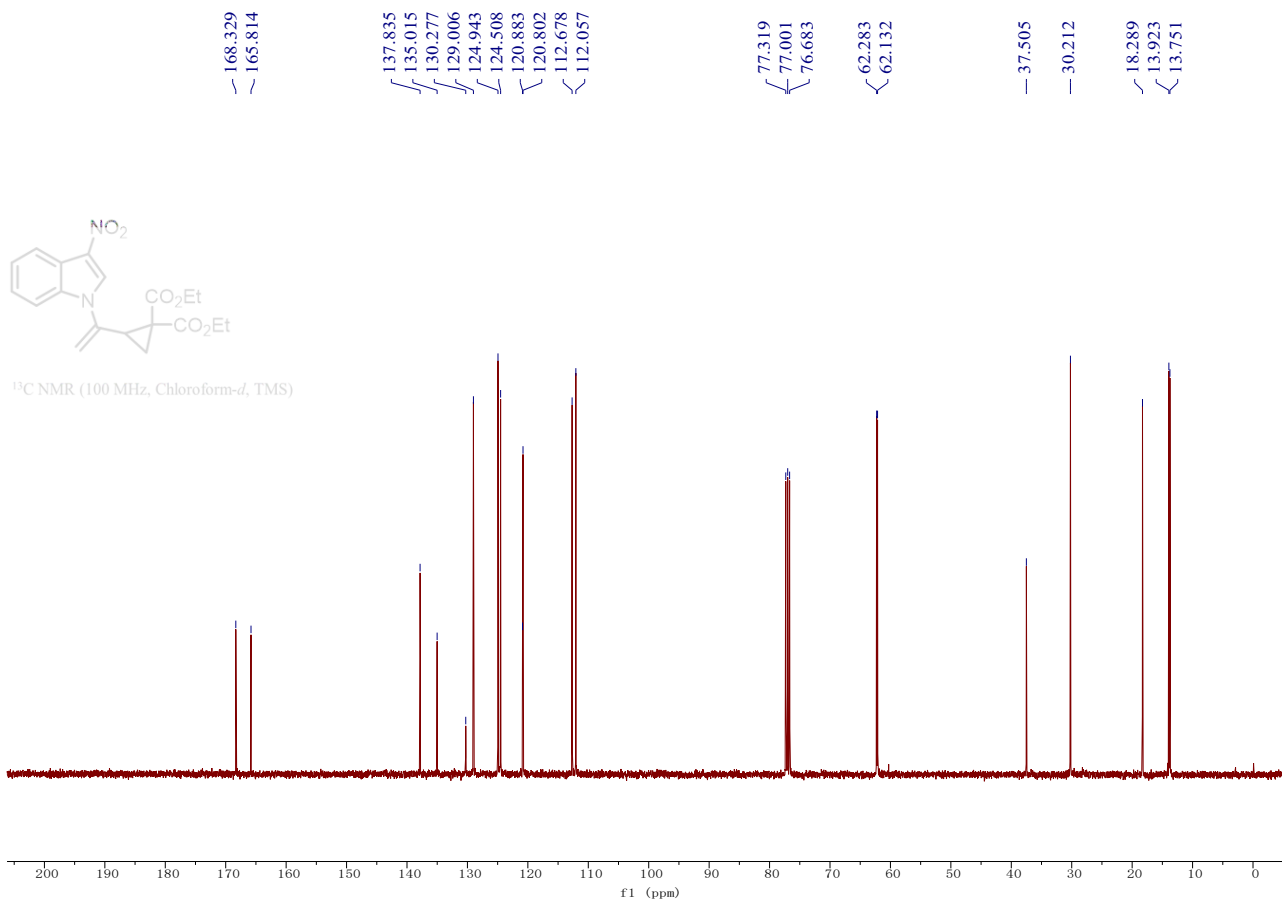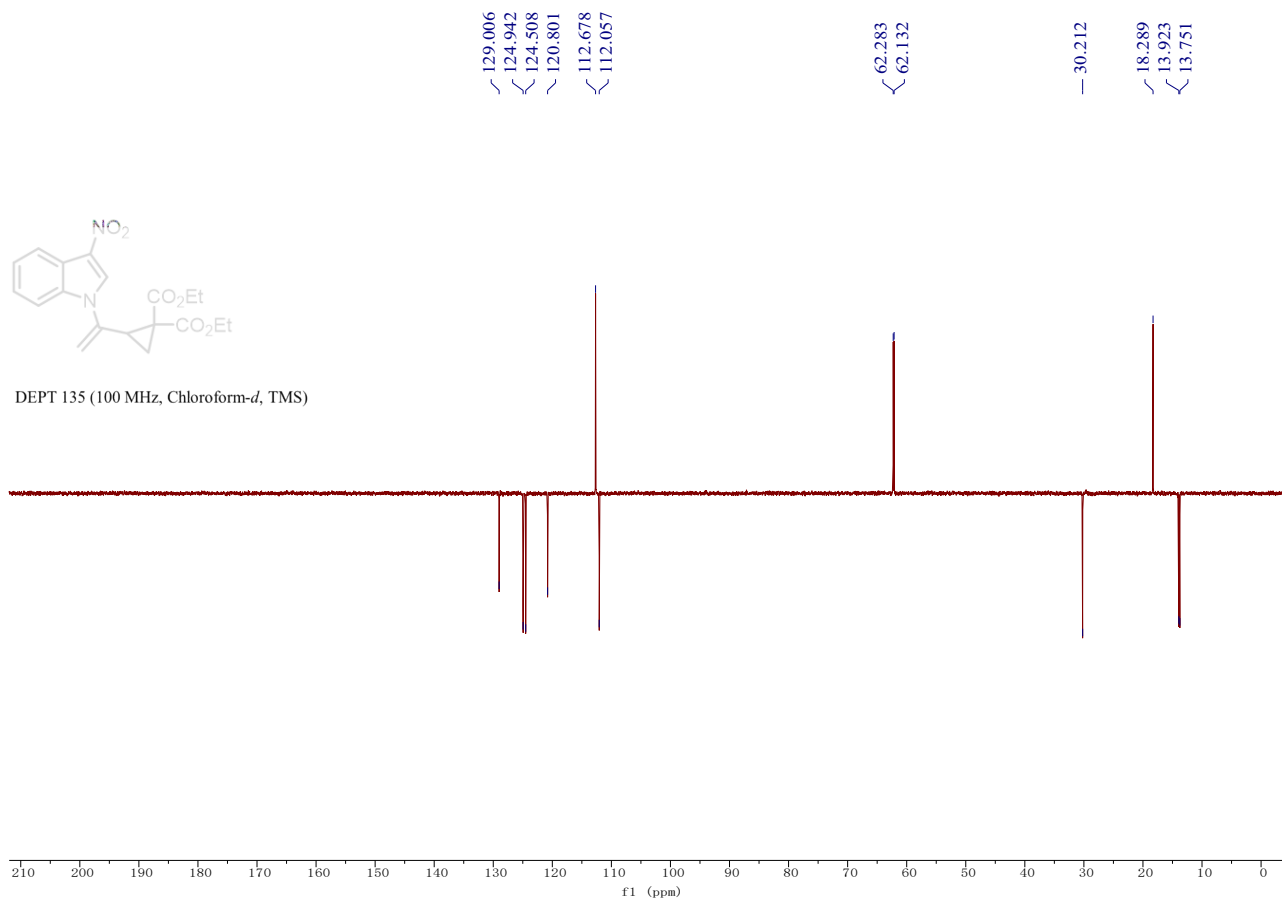

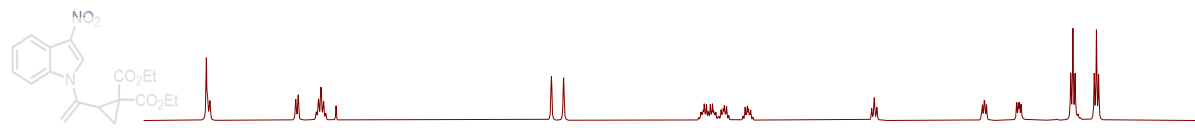

HSQC (400 MHz, Chloroform-*d*, TMS)

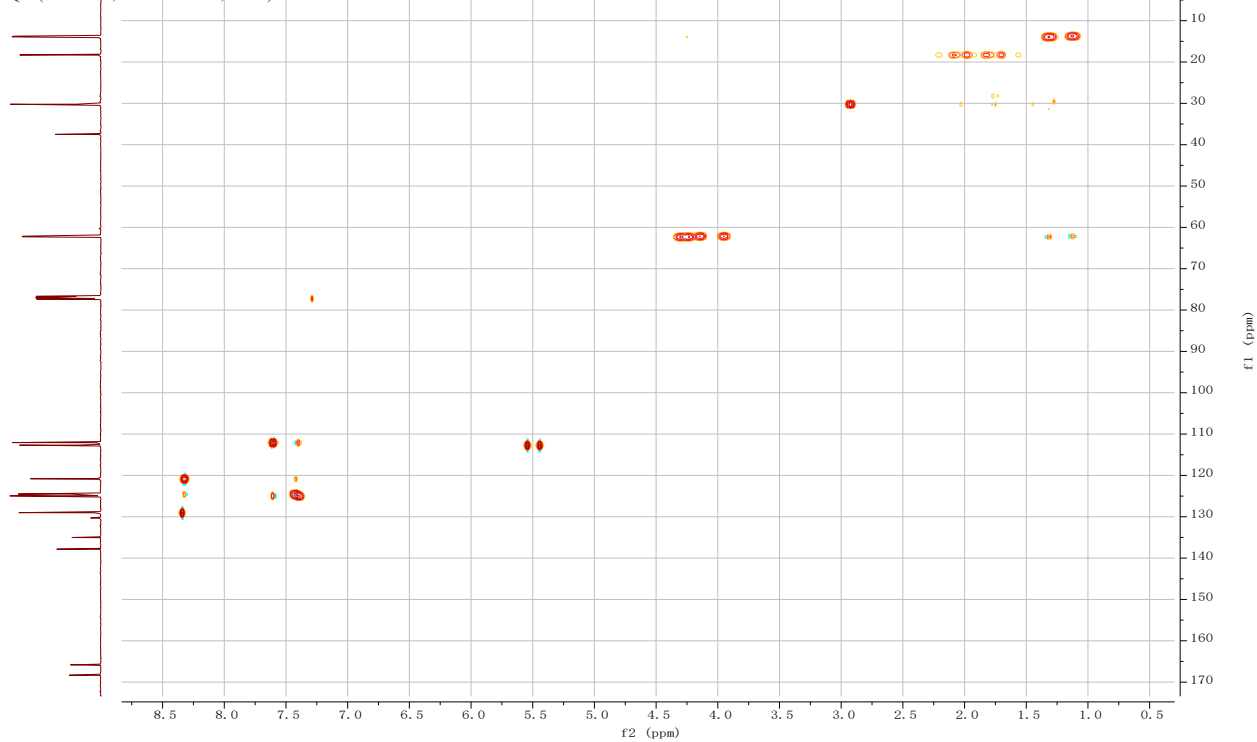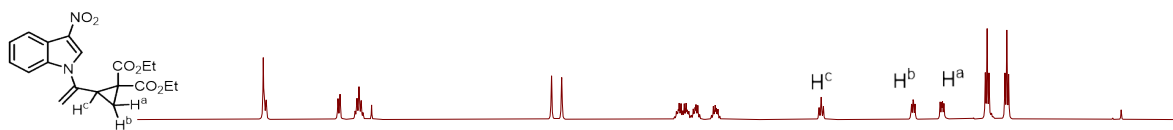

<sup>1</sup>H-<sup>1</sup>H COSY (400 MHz, Chloroform-*d*, TMS)

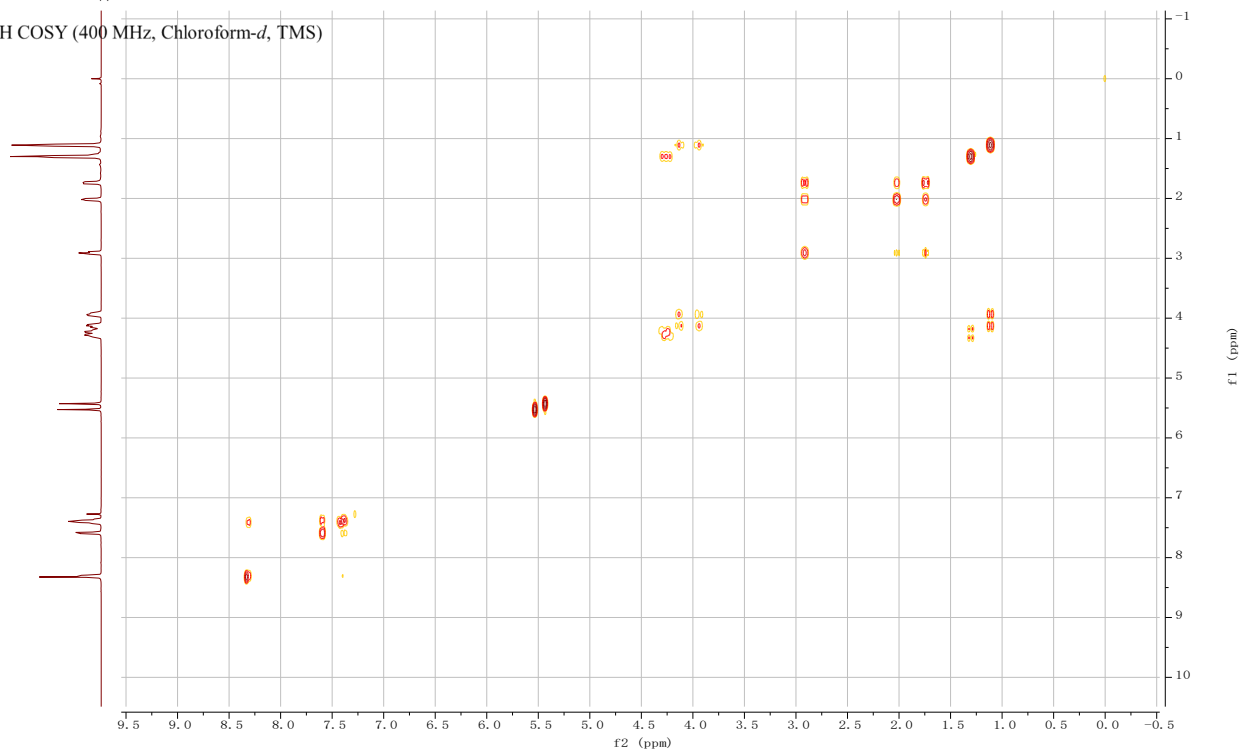

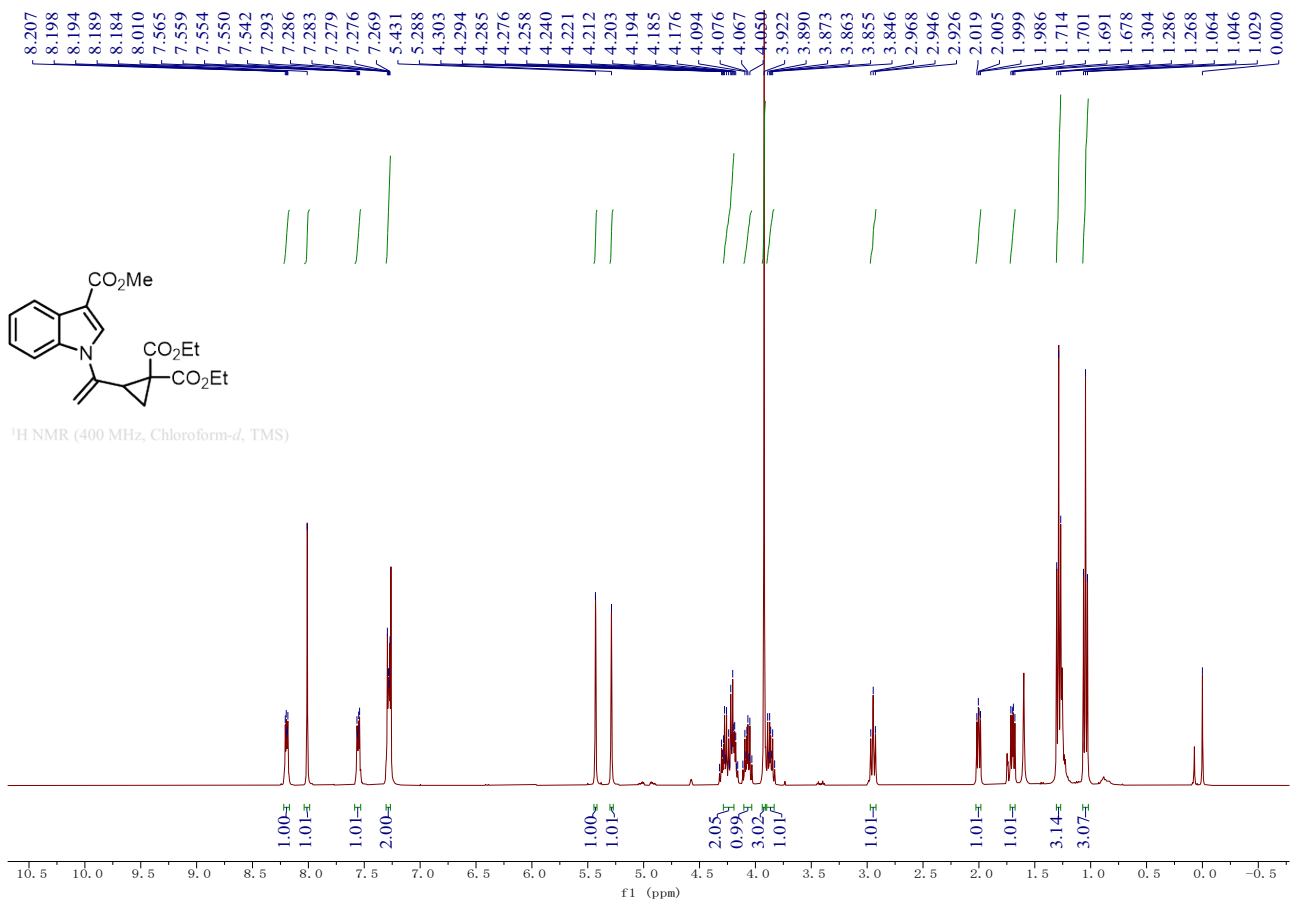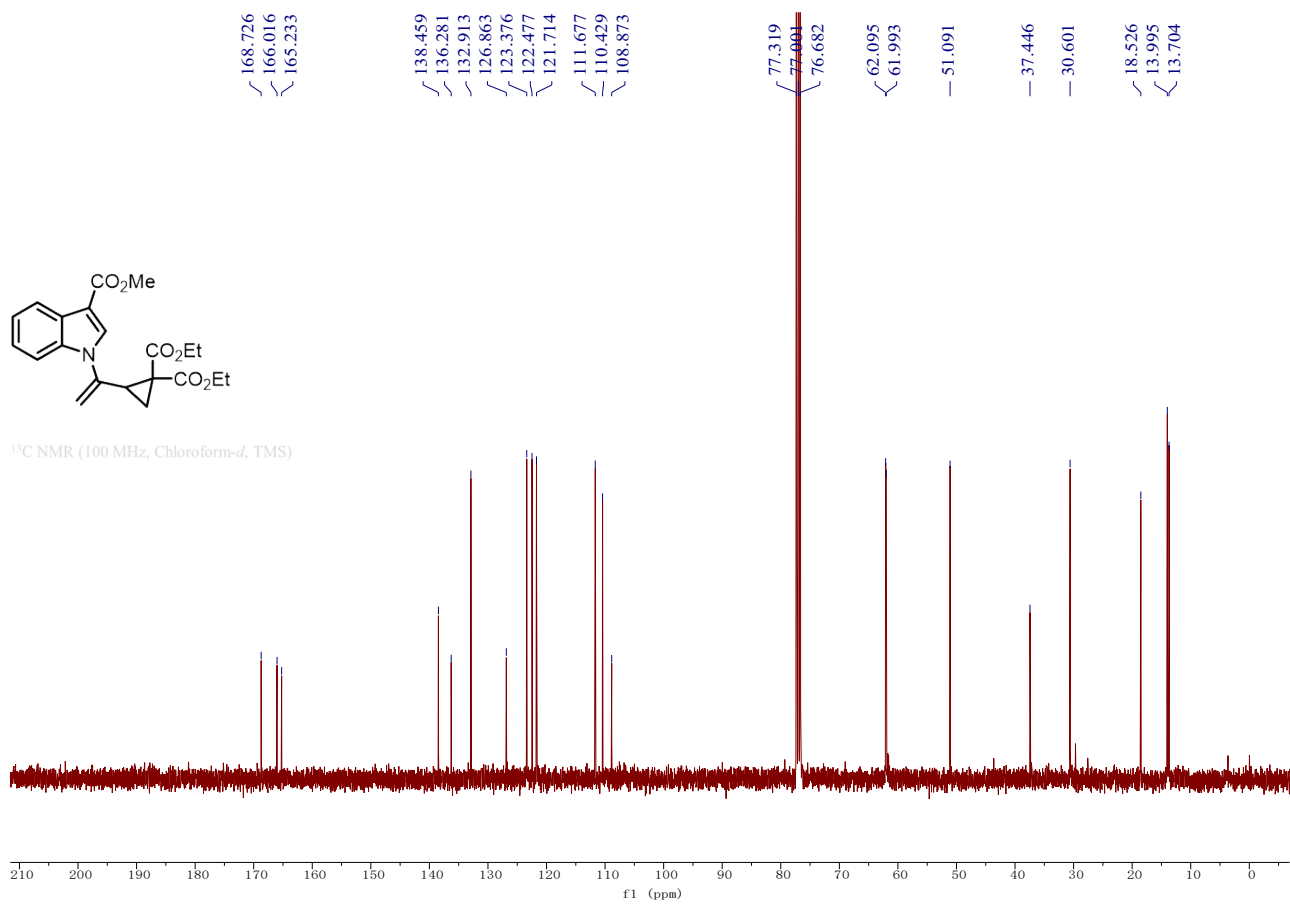

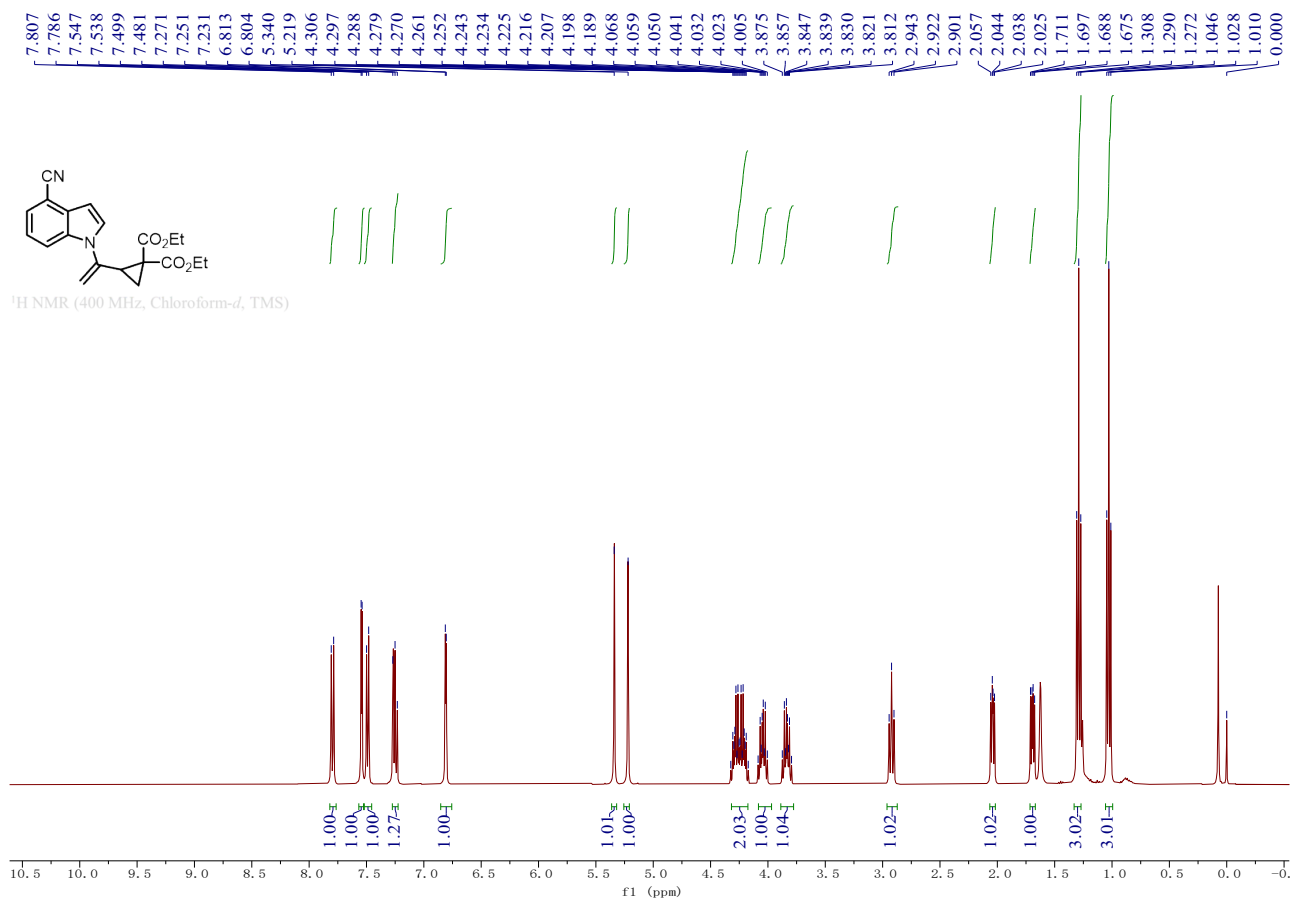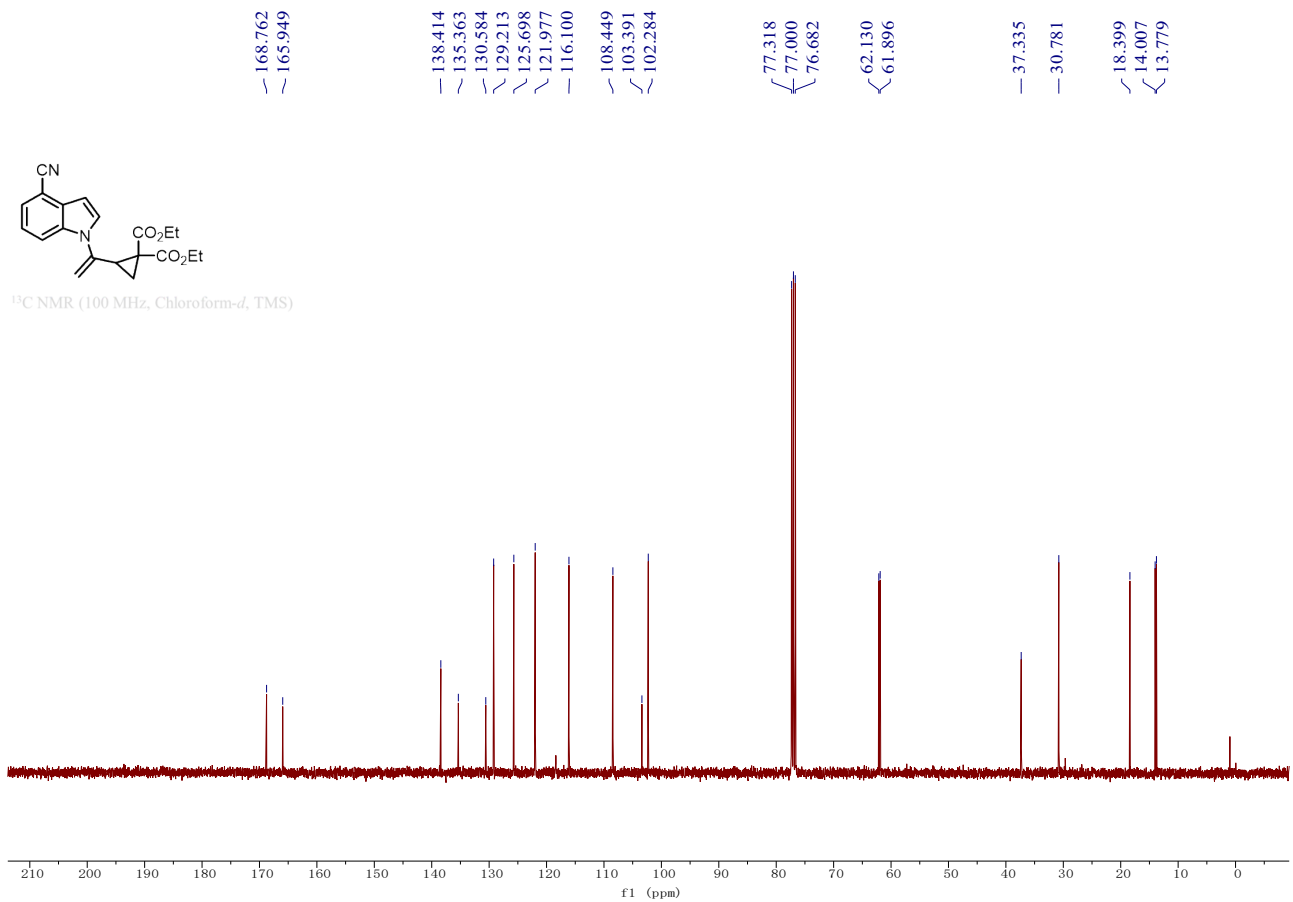





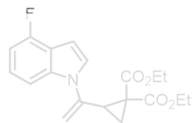

<sup>19</sup>F NMR (376 MHz, Chloroform-*d*, CFC1<sub>3</sub>)

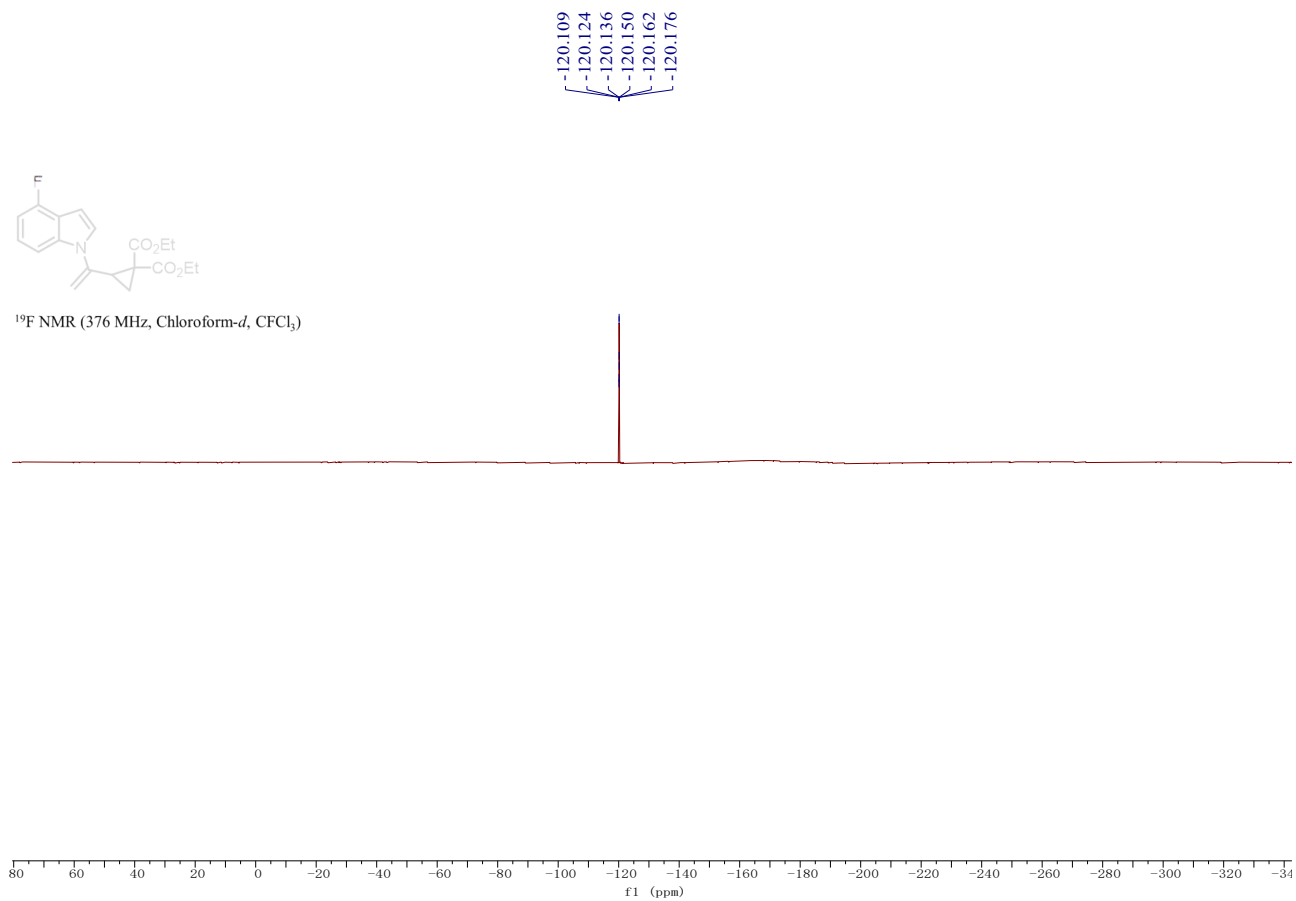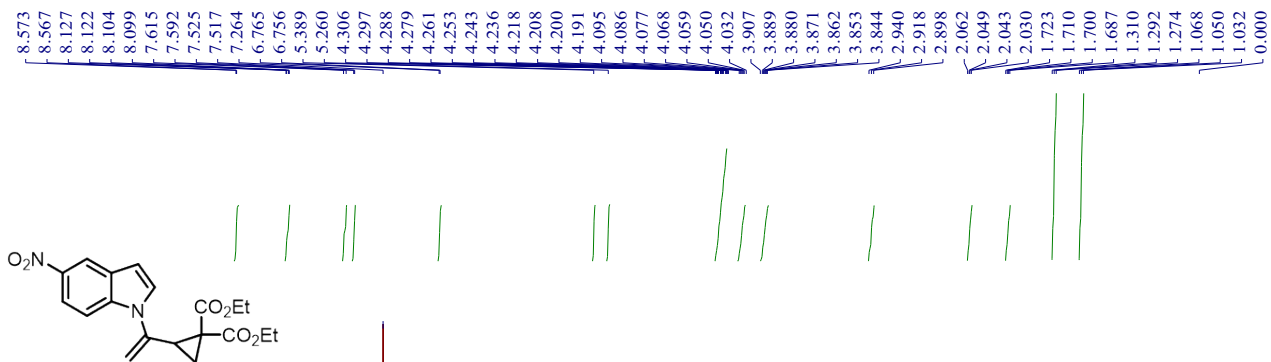

<sup>1</sup>H NMR (400 MHz, Chloroform-*d*, TMS)

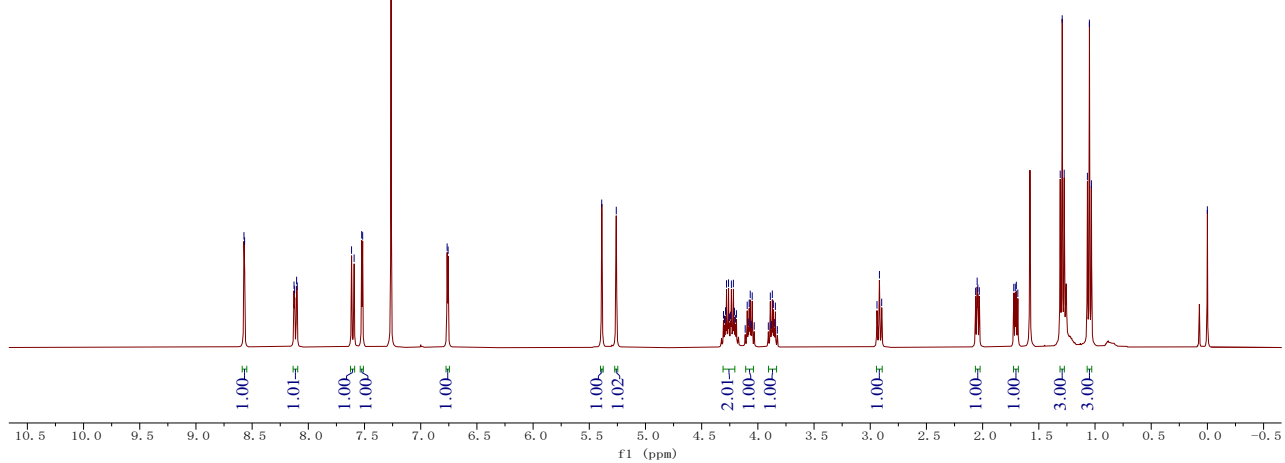

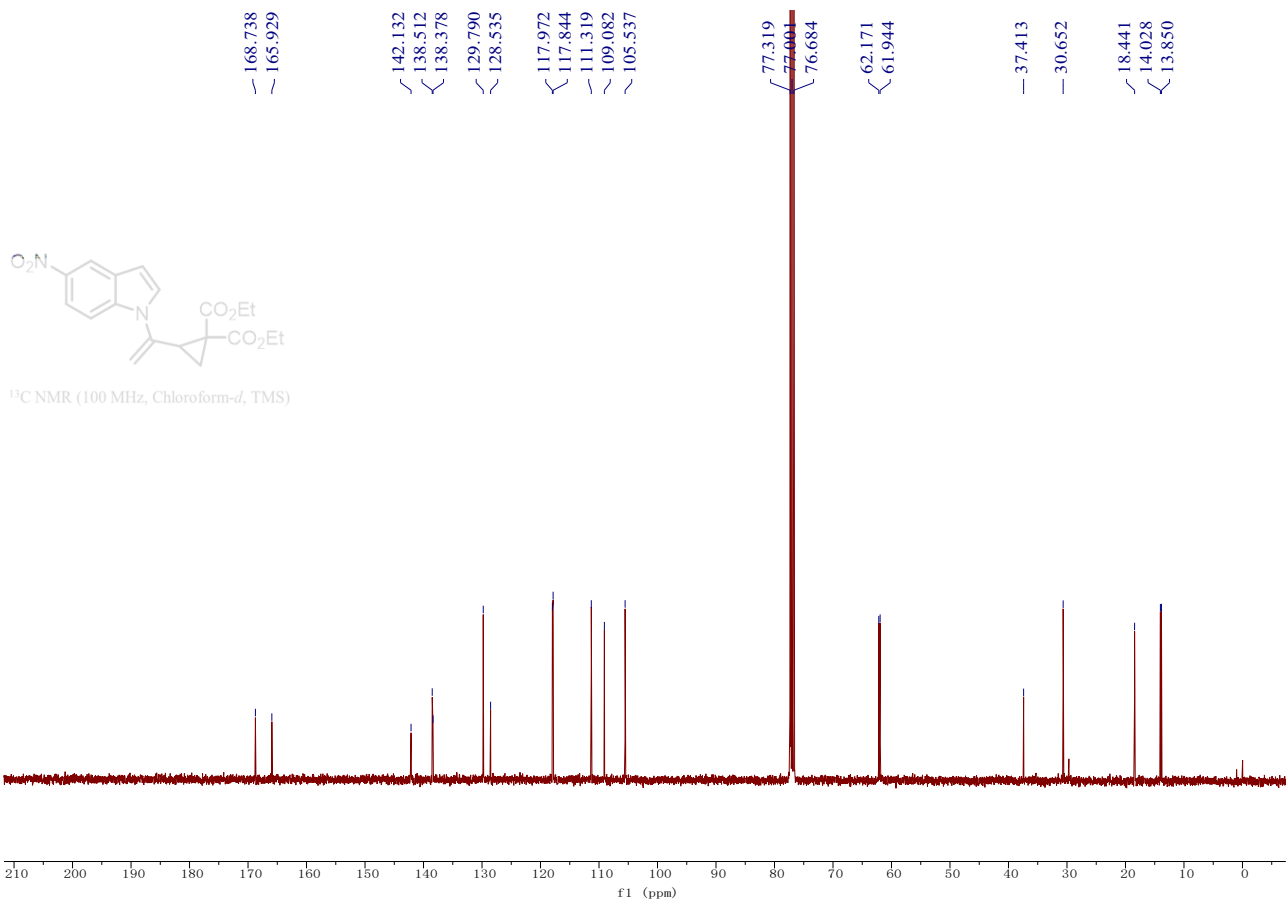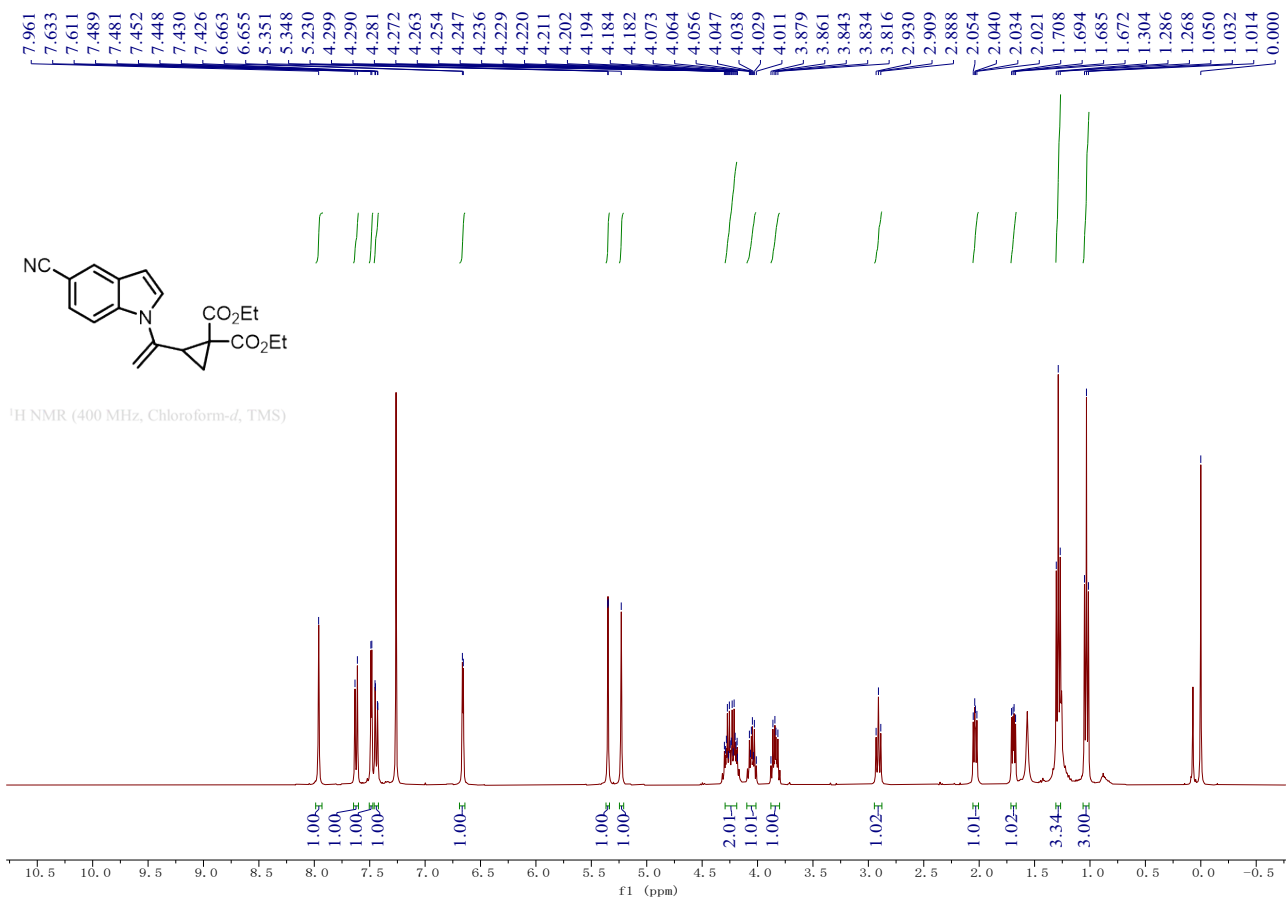

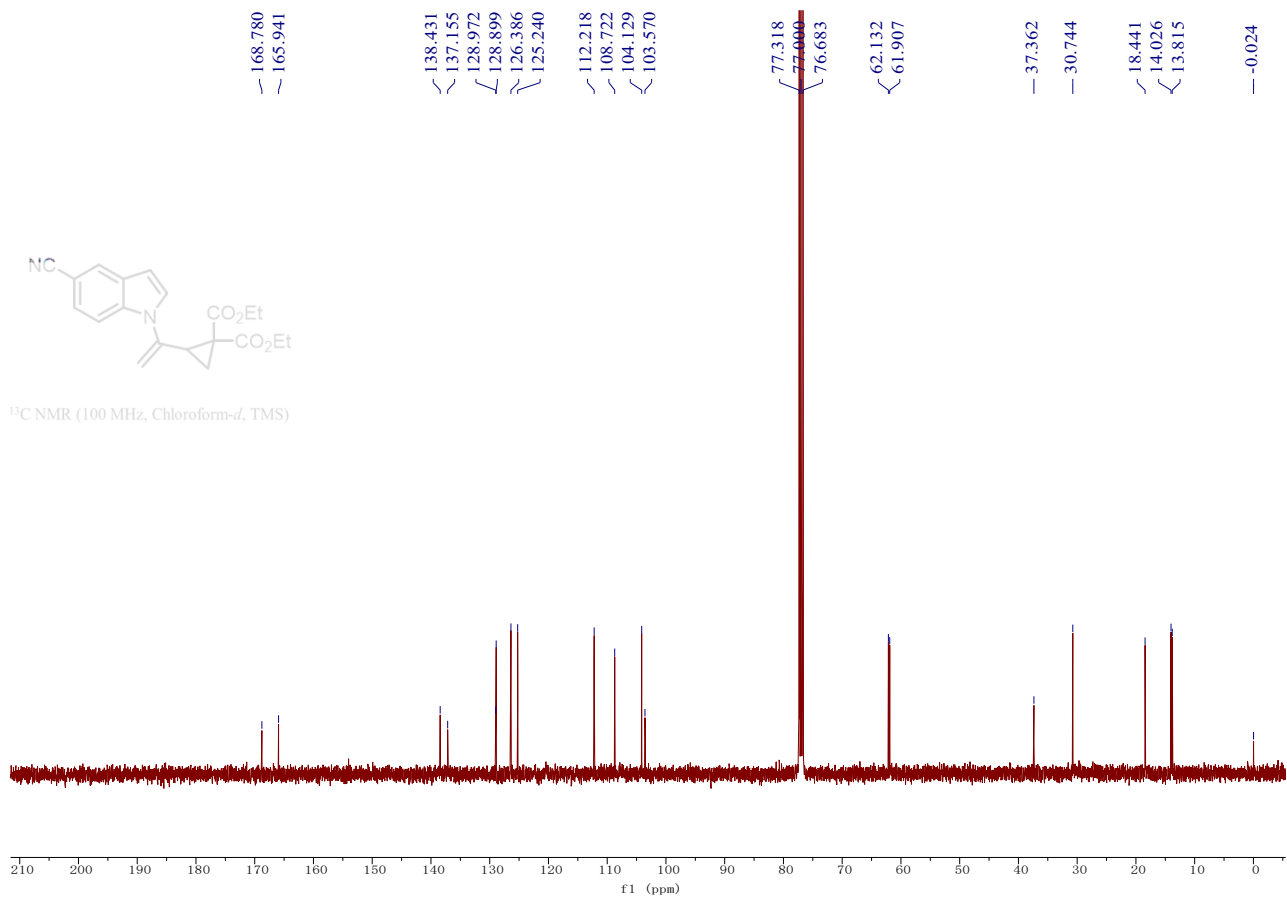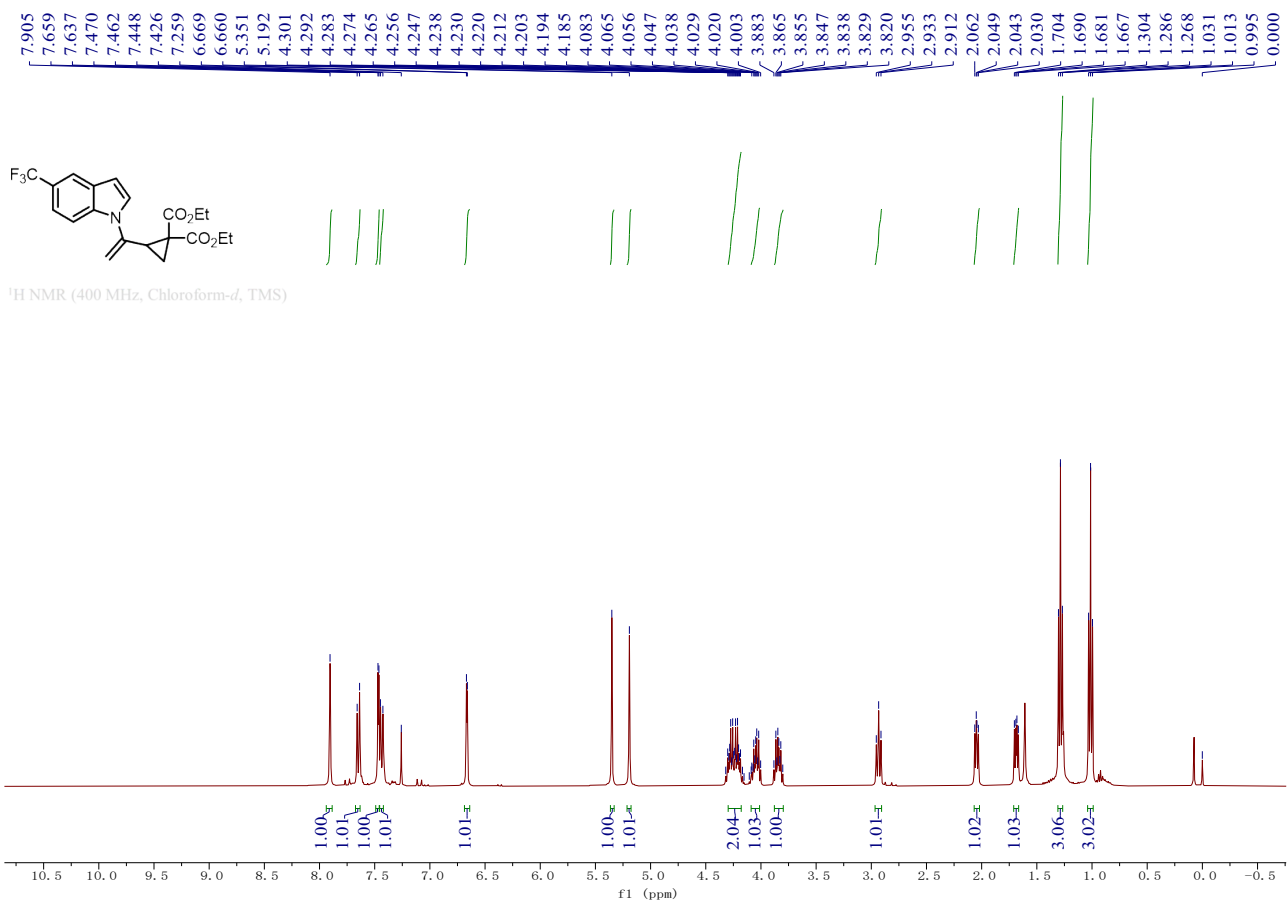

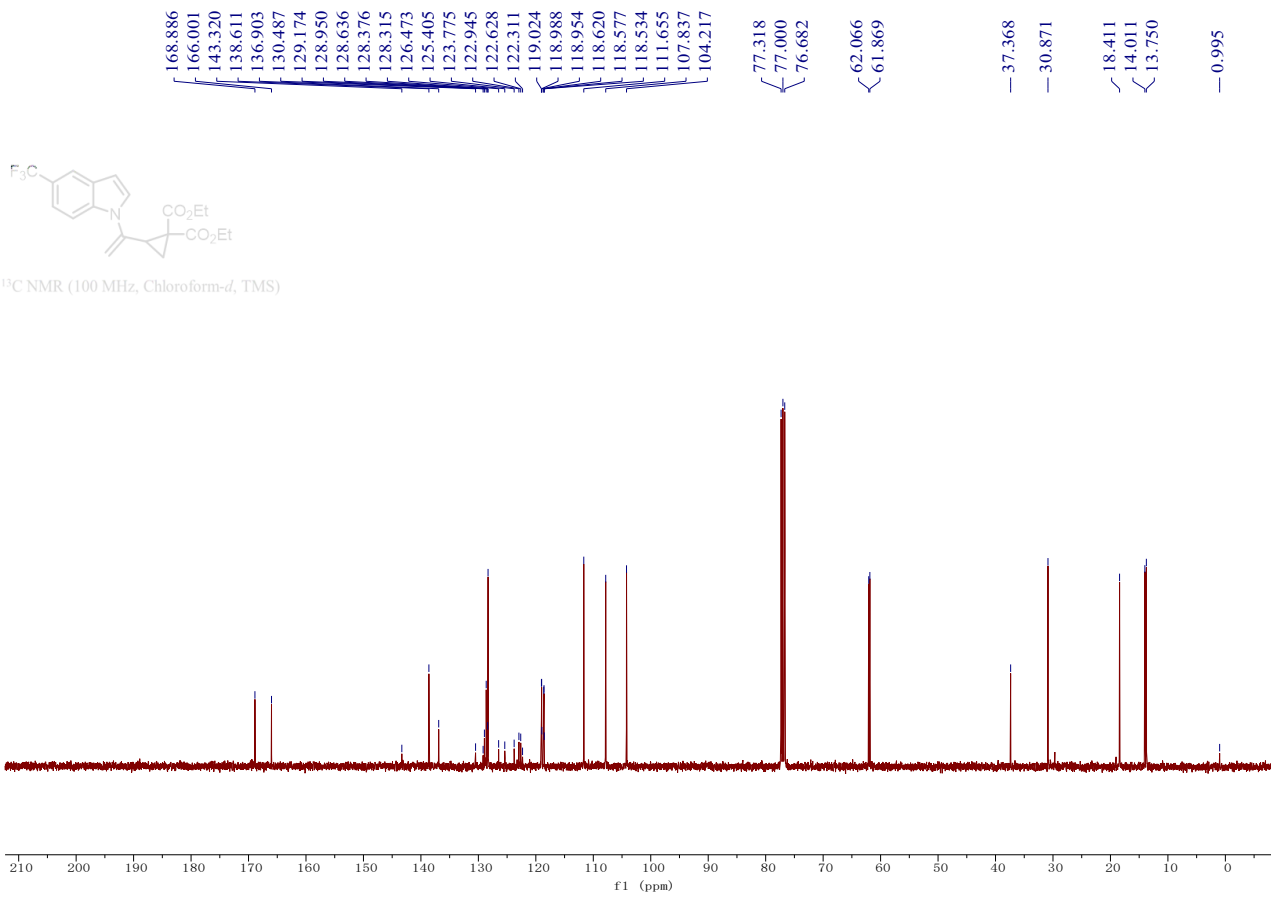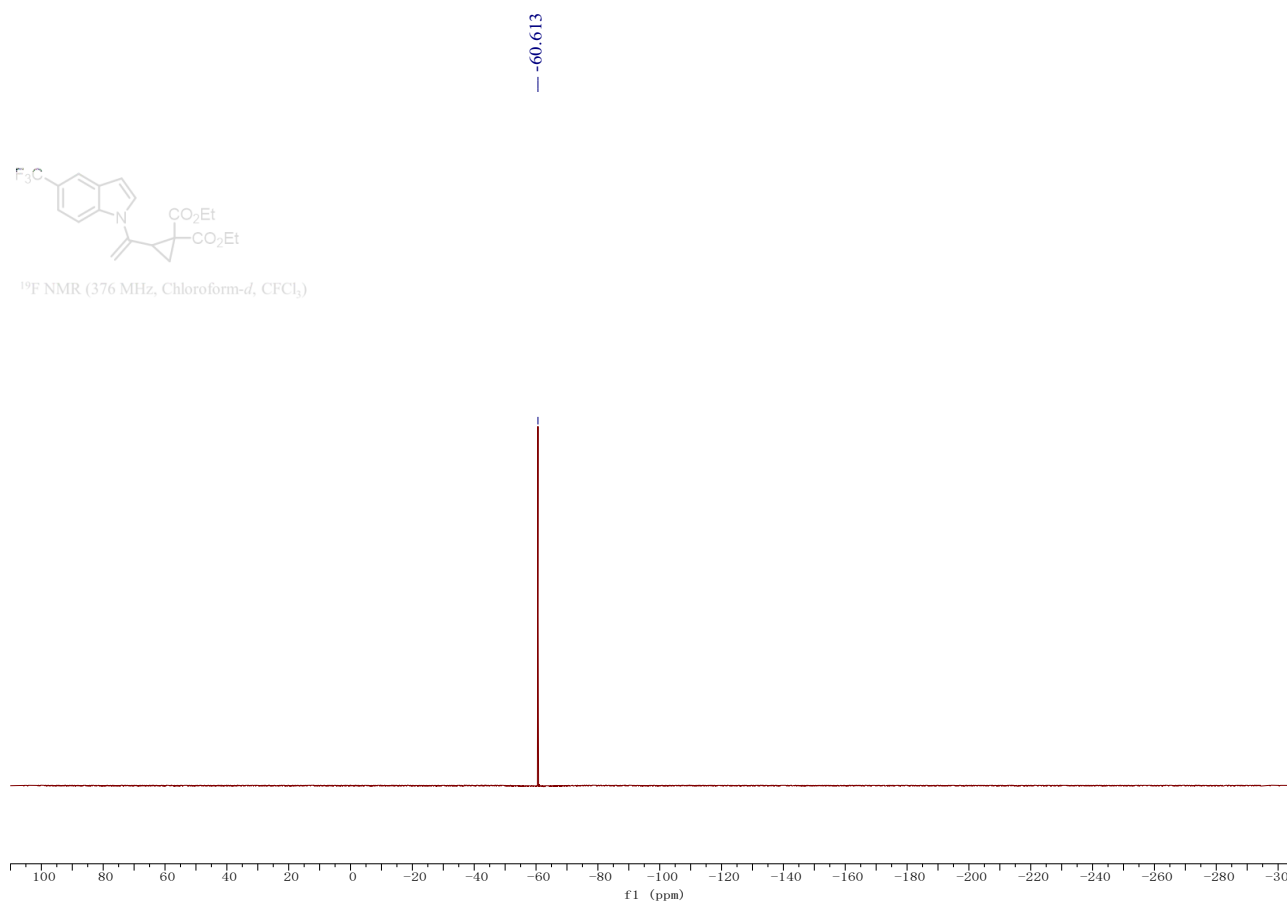

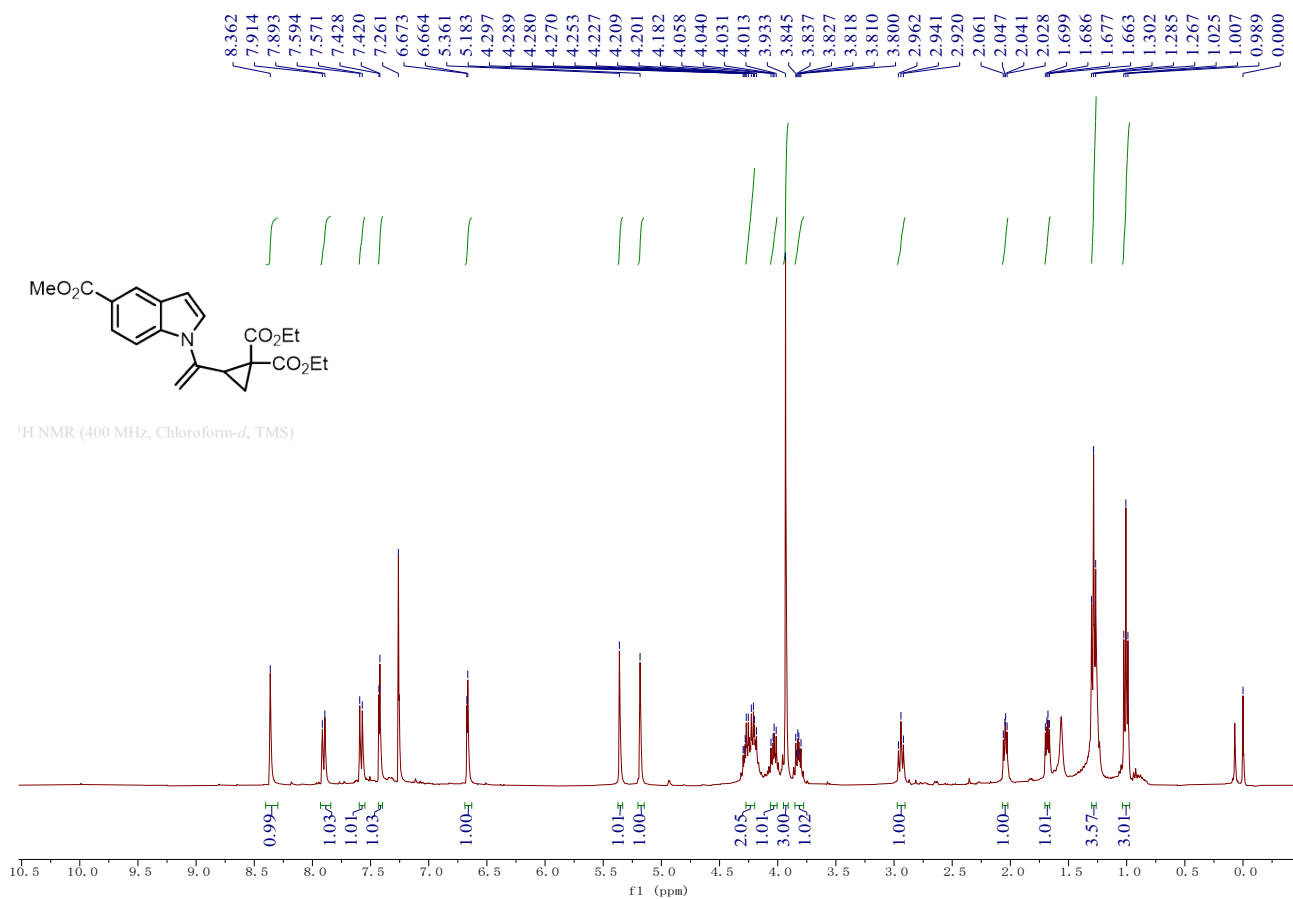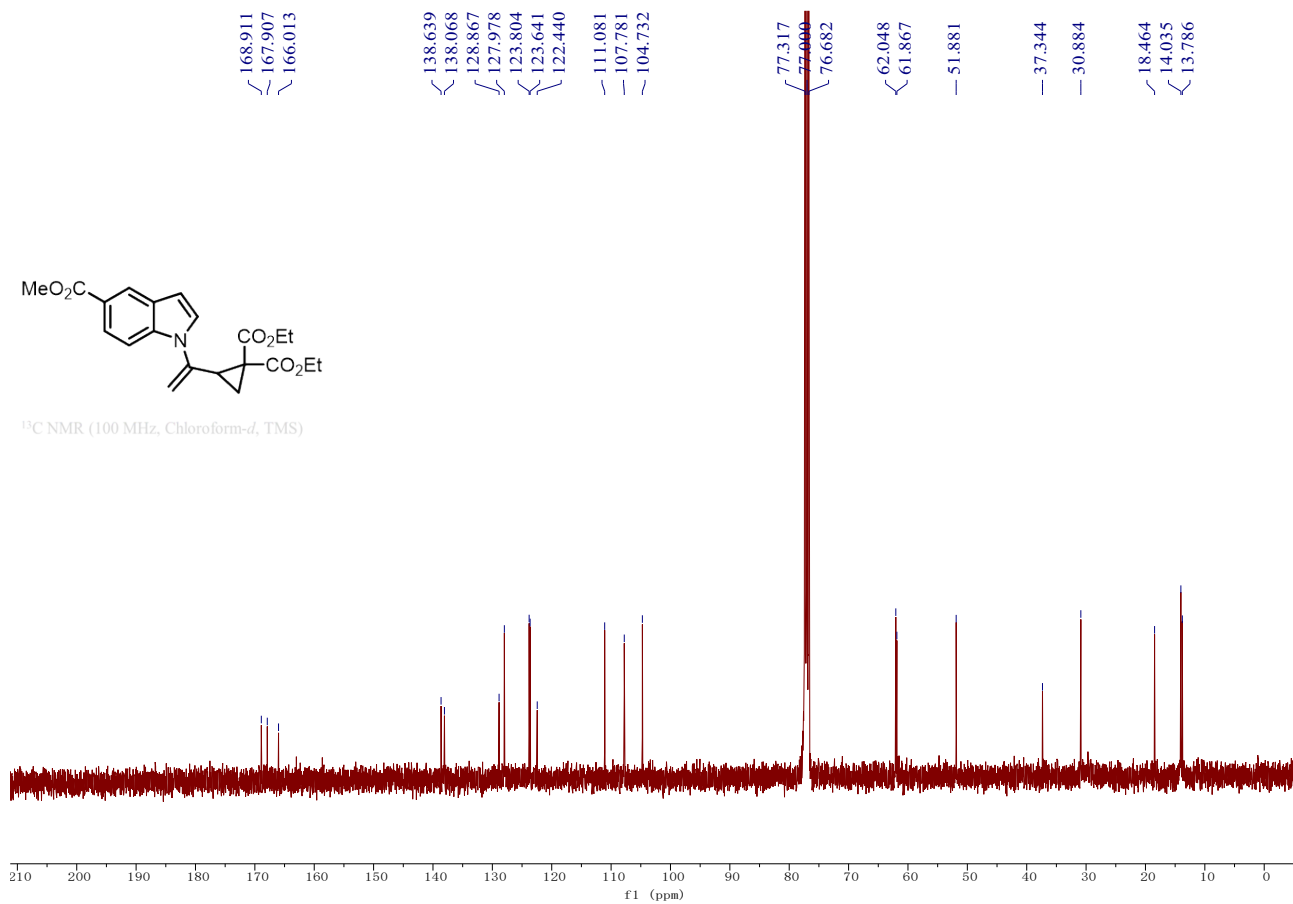



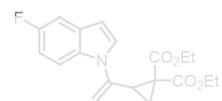

<sup>19</sup>F NMR (376 MHz, Chloroform-*d*, CFCl<sub>3</sub>)

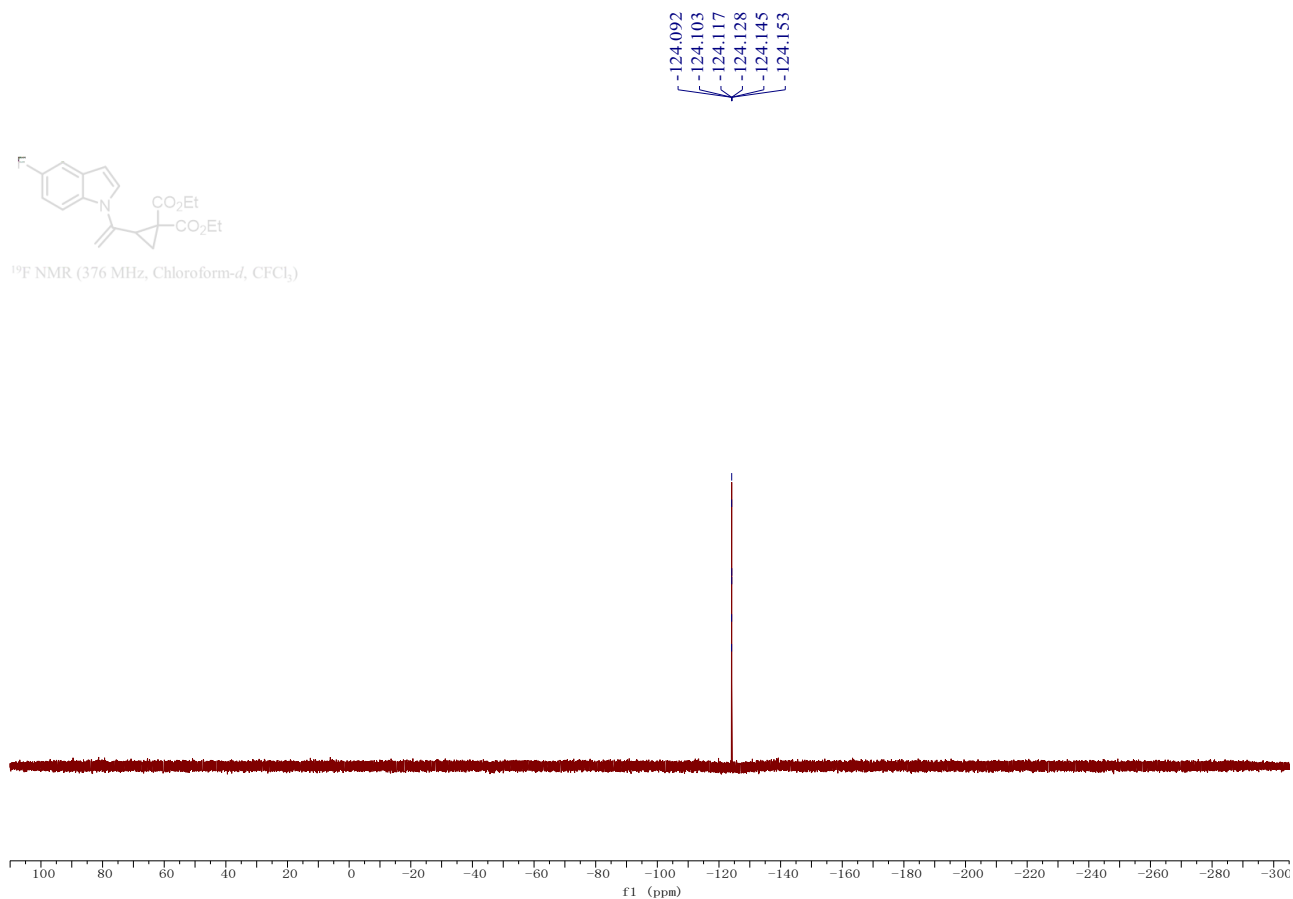

8.127  
7.658  
7.637  
7.584  
7.563  
7.354  
7.345  
7.261  
6.589  
5.330  
5.114  
4.294  
4.285  
4.276  
4.267  
4.258  
4.249  
4.240  
4.232  
4.223  
4.215  
4.205  
4.196  
4.187  
4.178  
4.089  
4.072  
4.054  
4.044  
4.035  
4.026  
4.017  
4.009  
3.863  
3.854  
3.845  
3.836  
3.827  
3.819  
2.963  
2.942  
2.920  
2.052  
2.039  
2.032  
2.020  
1.681  
1.668  
1.658  
1.645  
1.365  
1.300  
1.283  
1.265  
1.016  
0.998  
0.980  
0.001

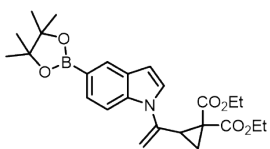

<sup>1</sup>H NMR (400 MHz, Chloroform-*d*, TMS)

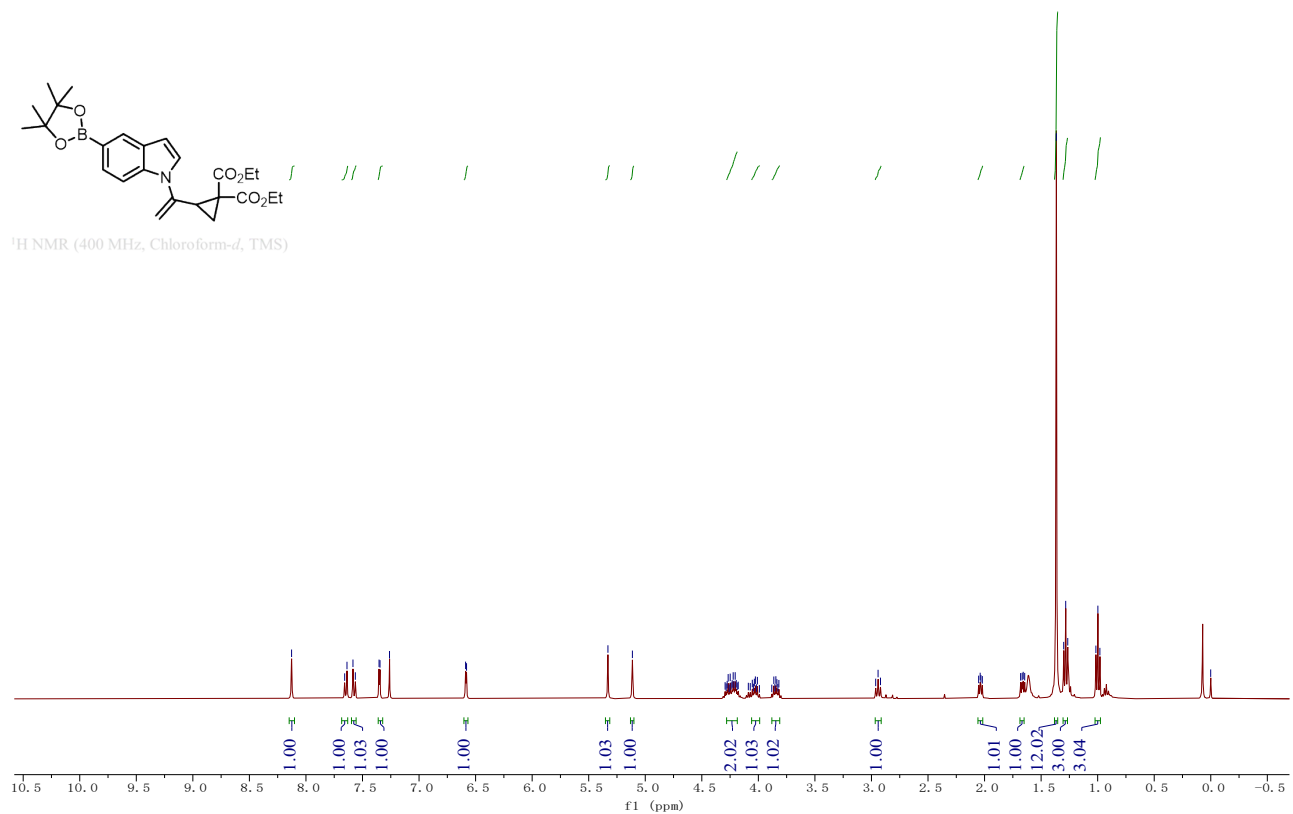



$\swarrow$  169.055  
 $\swarrow$  166.112  
  
 $\swarrow$  138.746  
 $\swarrow$  137.578  
 $\swarrow$  129.103  
 $\swarrow$  128.782  
 $\swarrow$  128.455  
 $\swarrow$  126.755  
  
 $\swarrow$  110.906  
 $\swarrow$  106.719  
 $\swarrow$  104.073  
  
 $\swarrow$  83.518  
 $\swarrow$  77.350  
 $\swarrow$  77.032  
 $\swarrow$  76.714  
  
 $\swarrow$  61.995  
 $\swarrow$  61.849  
  
 $\swarrow$  37.438  
 $\swarrow$  31.043  
 $\swarrow$  24.902  
 $\swarrow$  18.424  
 $\swarrow$  14.065  
 $\swarrow$  13.809

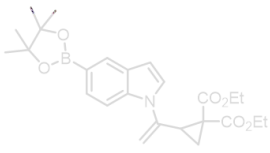

$^{13}\text{C}$  NMR (100 MHz, Chloroform-*d*, TMS)

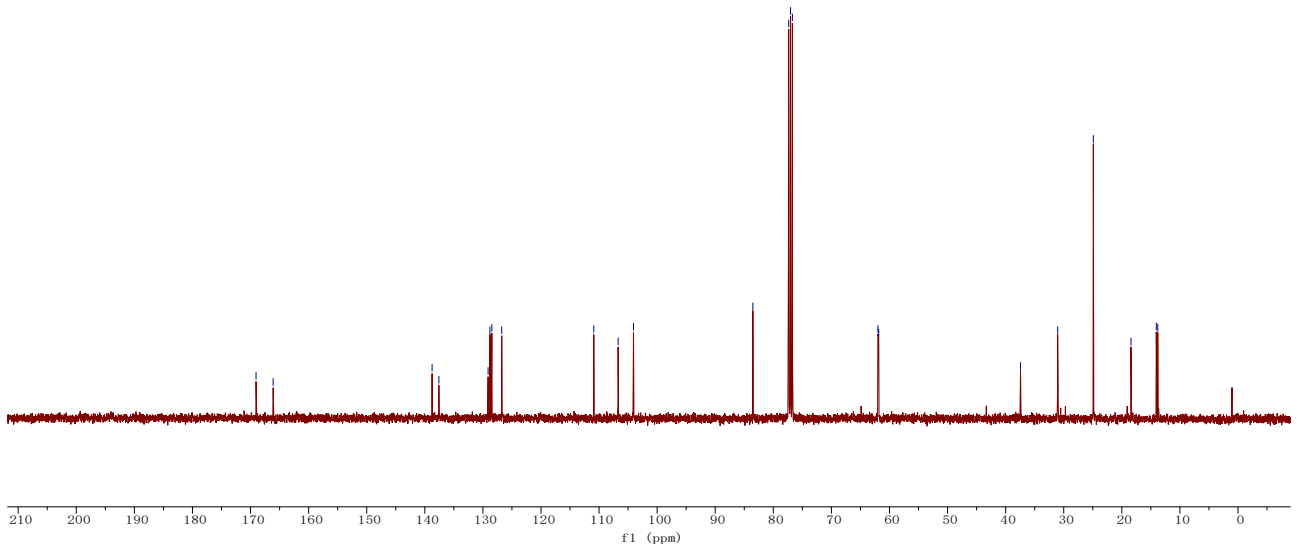

— 30.997

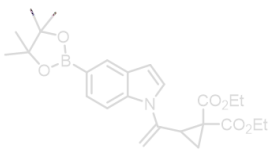

$^{11}\text{B}$  NMR (128.4 MHz, Chloroform-*d*)

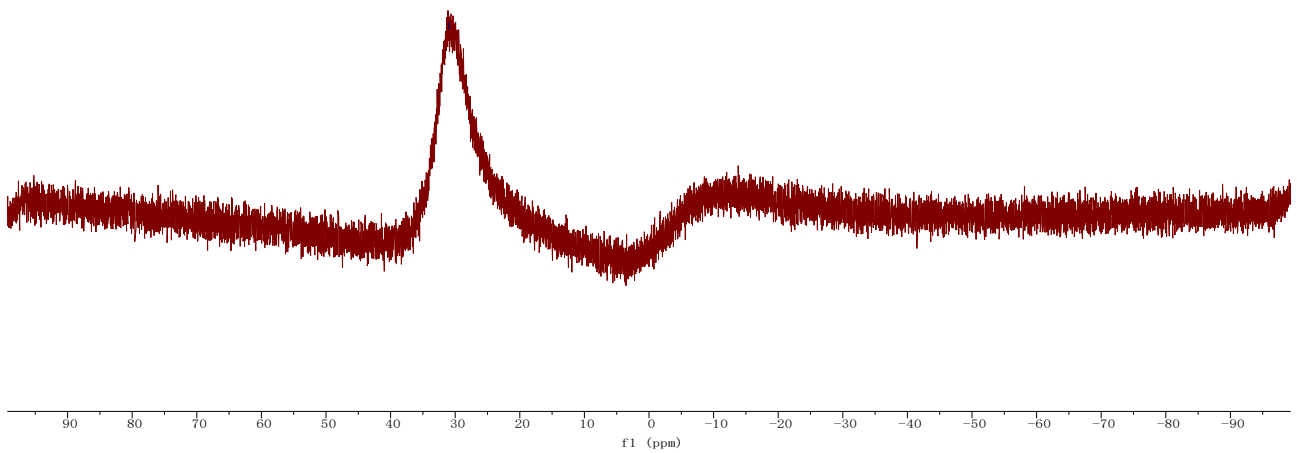

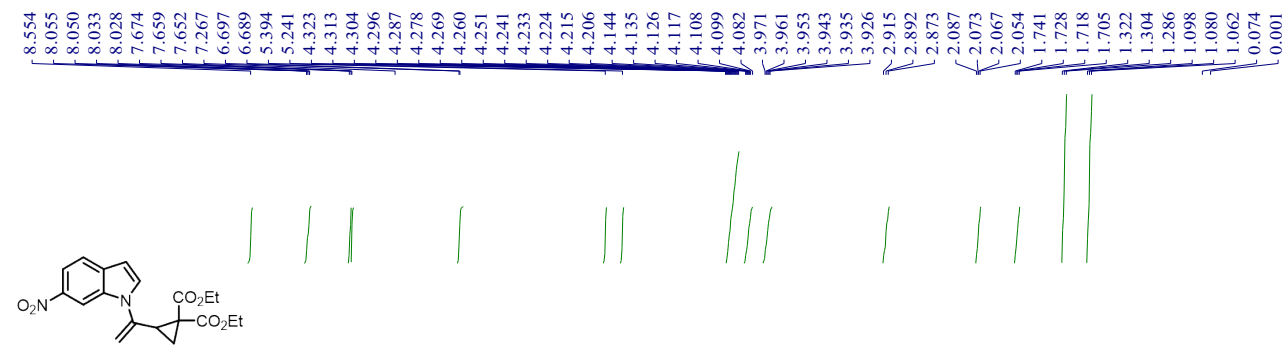

<sup>1</sup>H NMR (400 MHz, Chloroform-d, TMS)

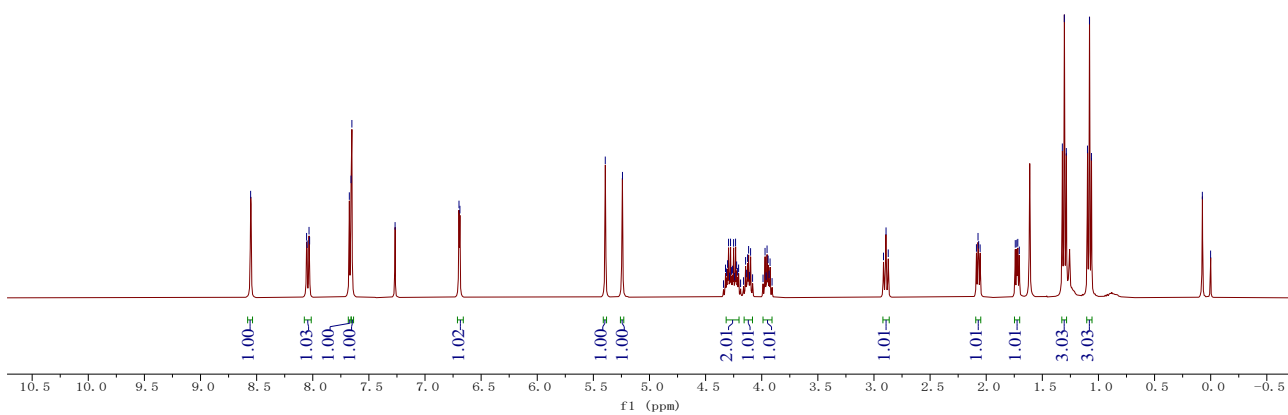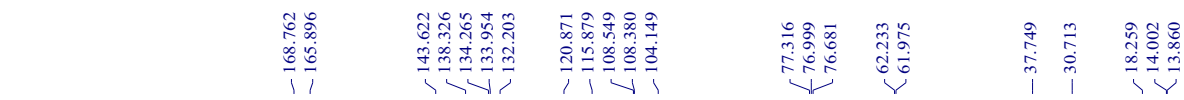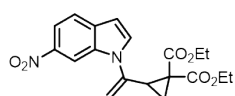

<sup>13</sup>C NMR (100 MHz, Chloroform-d, TMS)

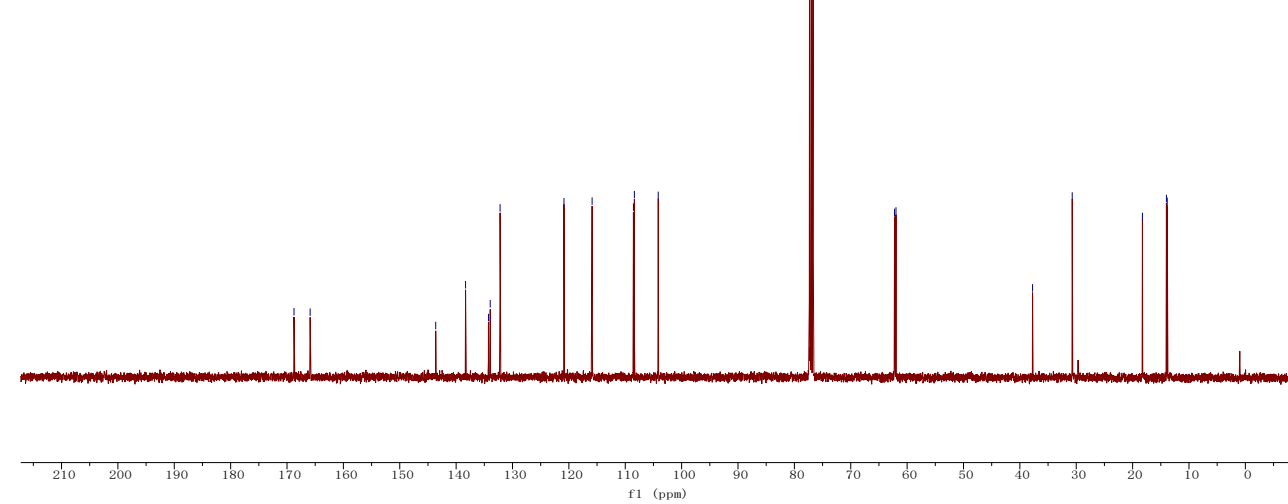

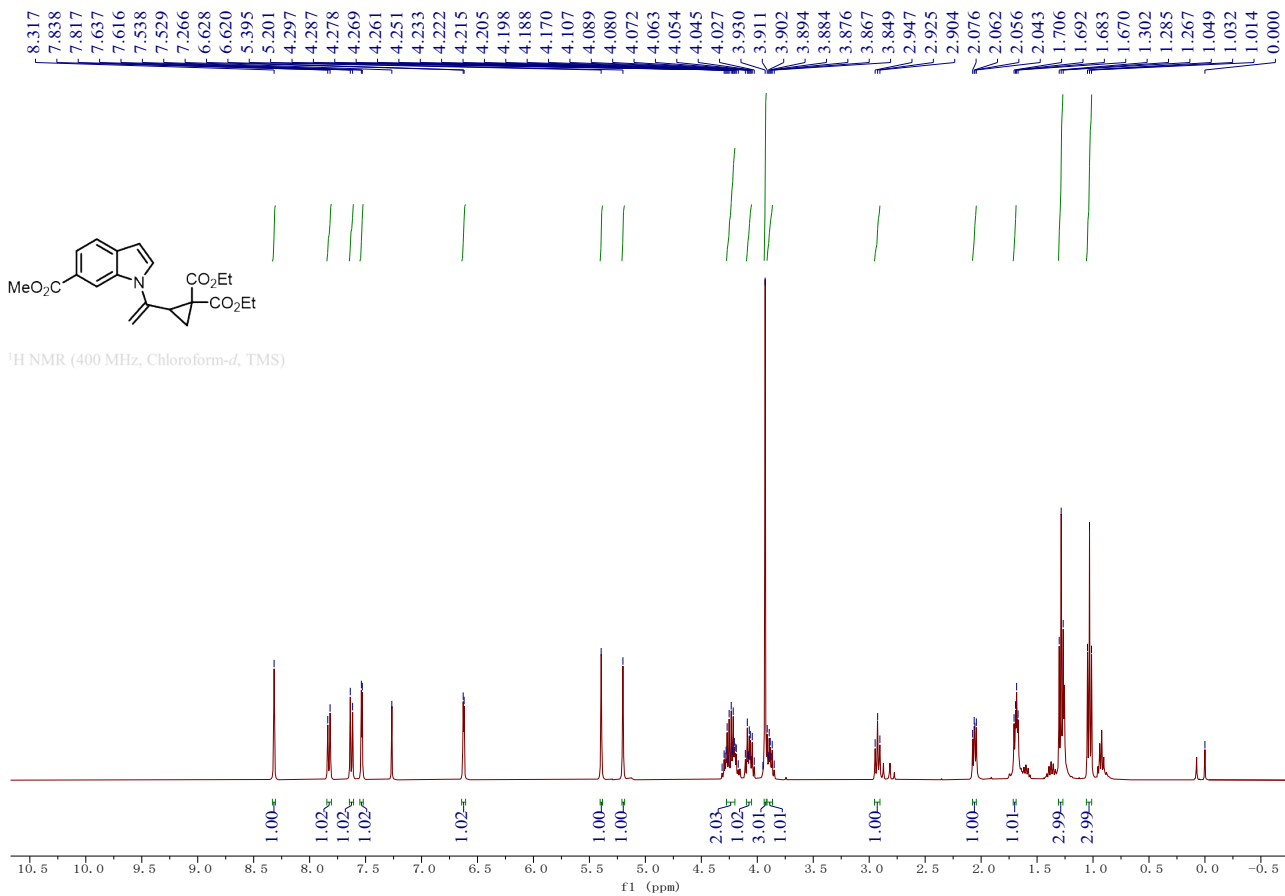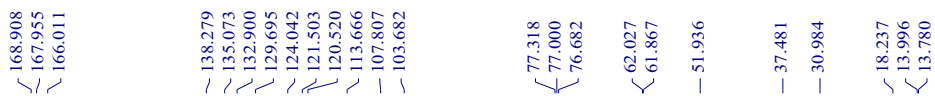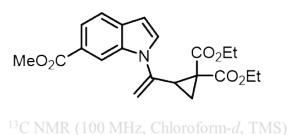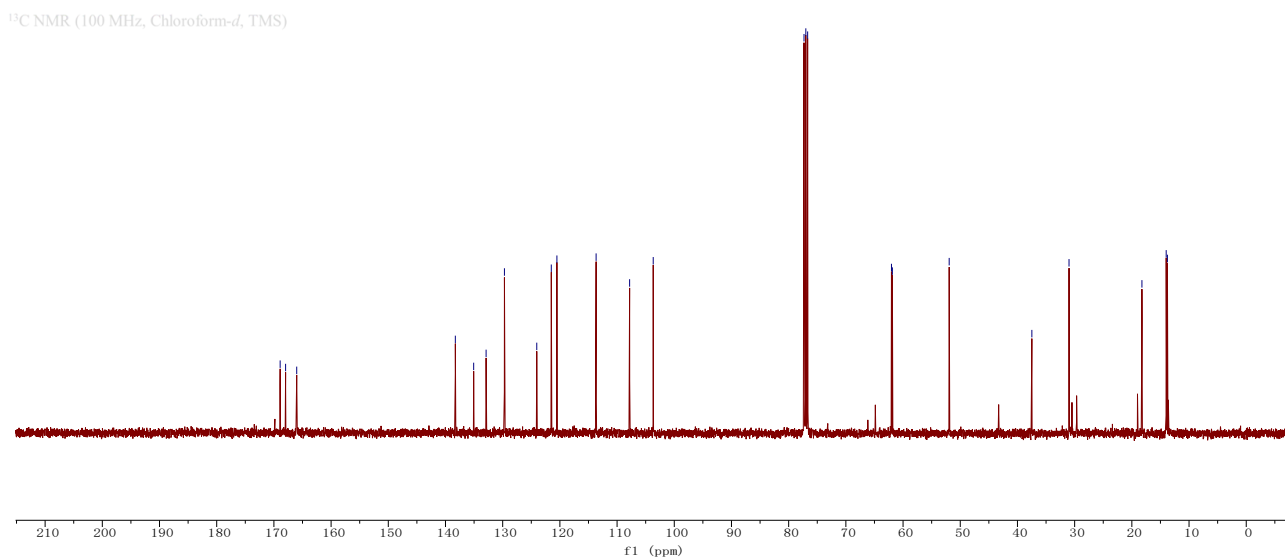

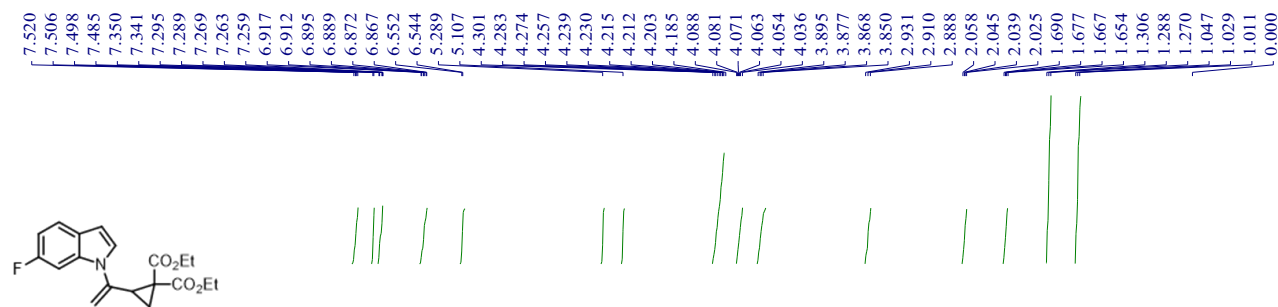

<sup>1</sup>H NMR (400 MHz, Chloroform-*d*, TMS)

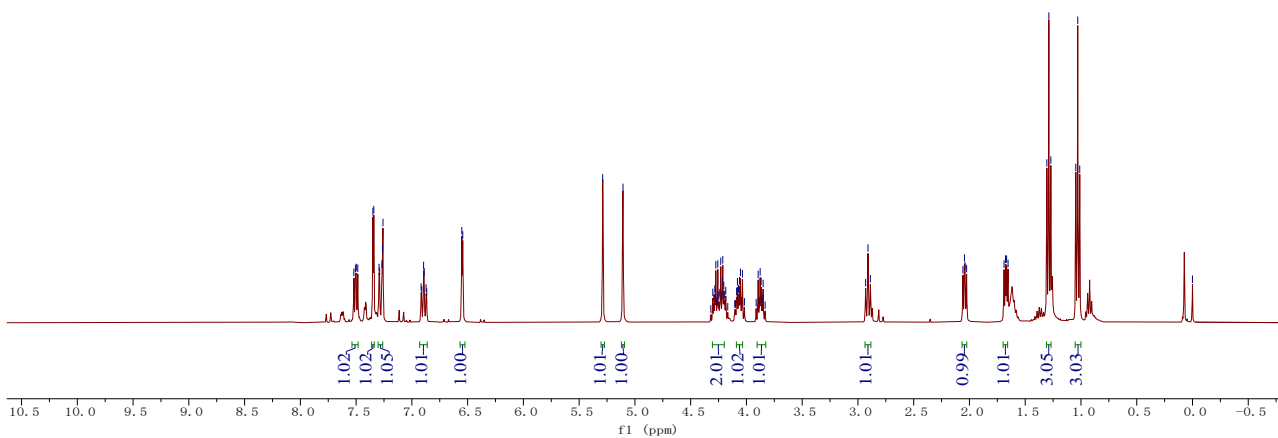

<sup>13</sup>C NMR (100 MHz, Chloroform-*d*, TMS)

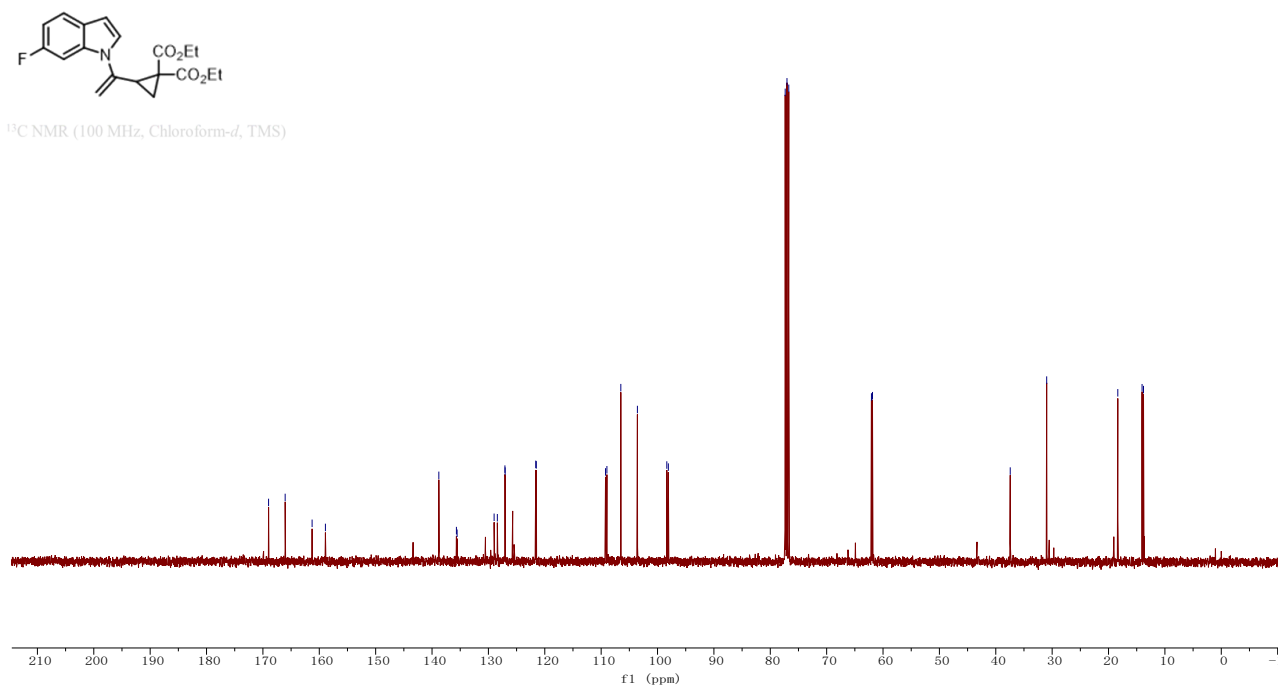

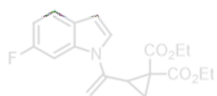

<sup>19</sup>F NMR (376 MHz, Chloroform-*d*, CFCl<sub>3</sub>)

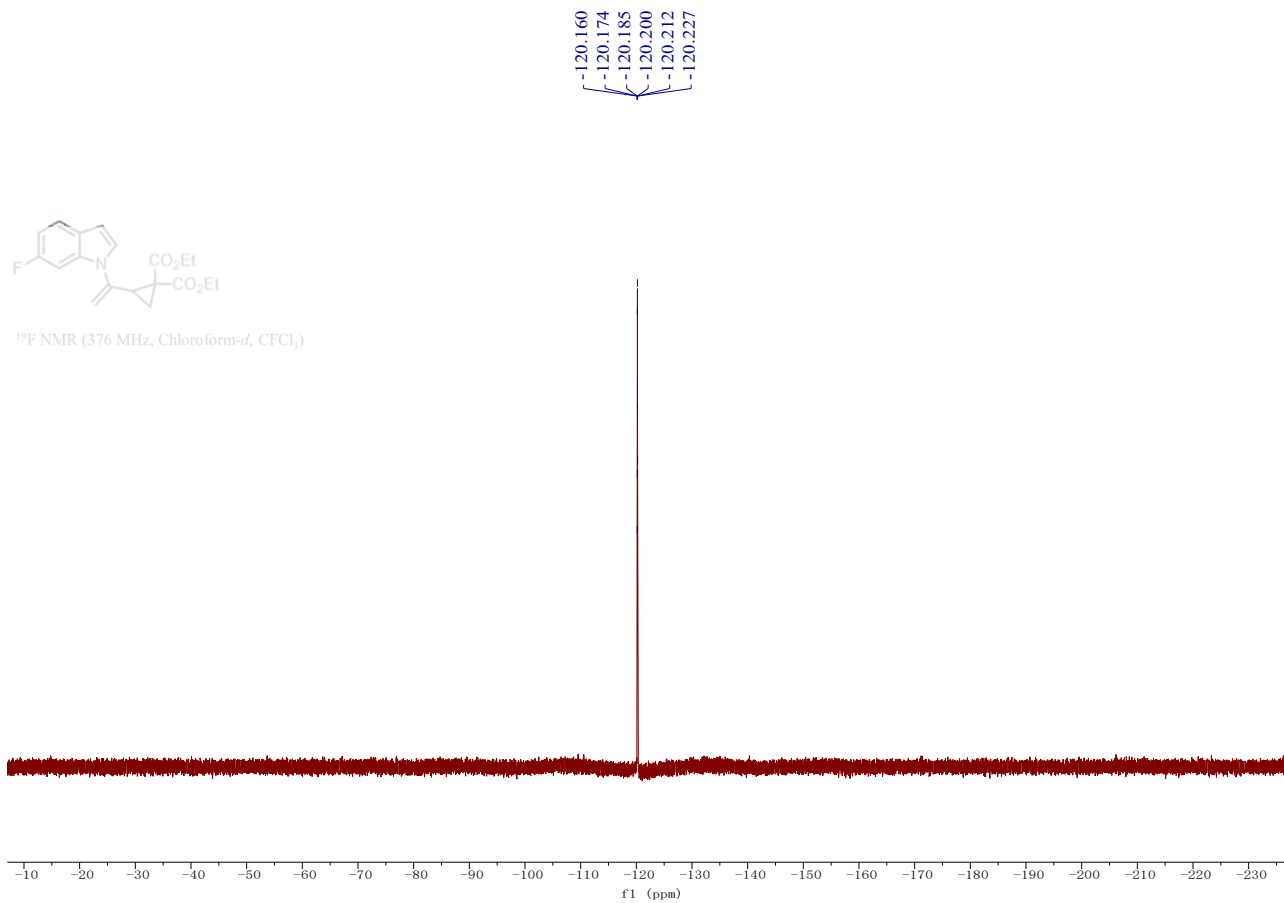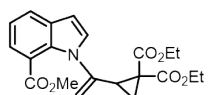

<sup>1</sup>H NMR (400 MHz, Chloroform-*d*, TMS)

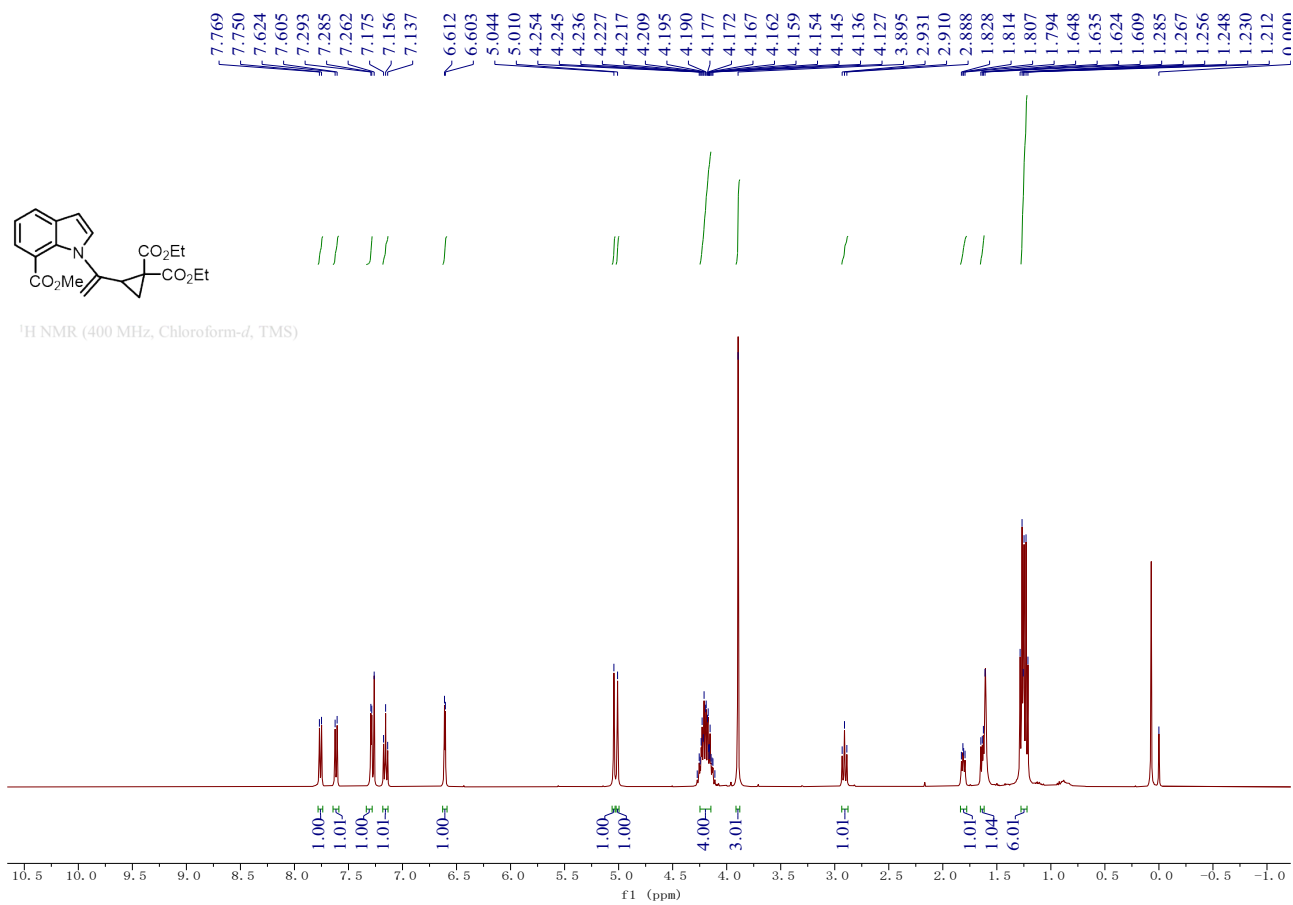

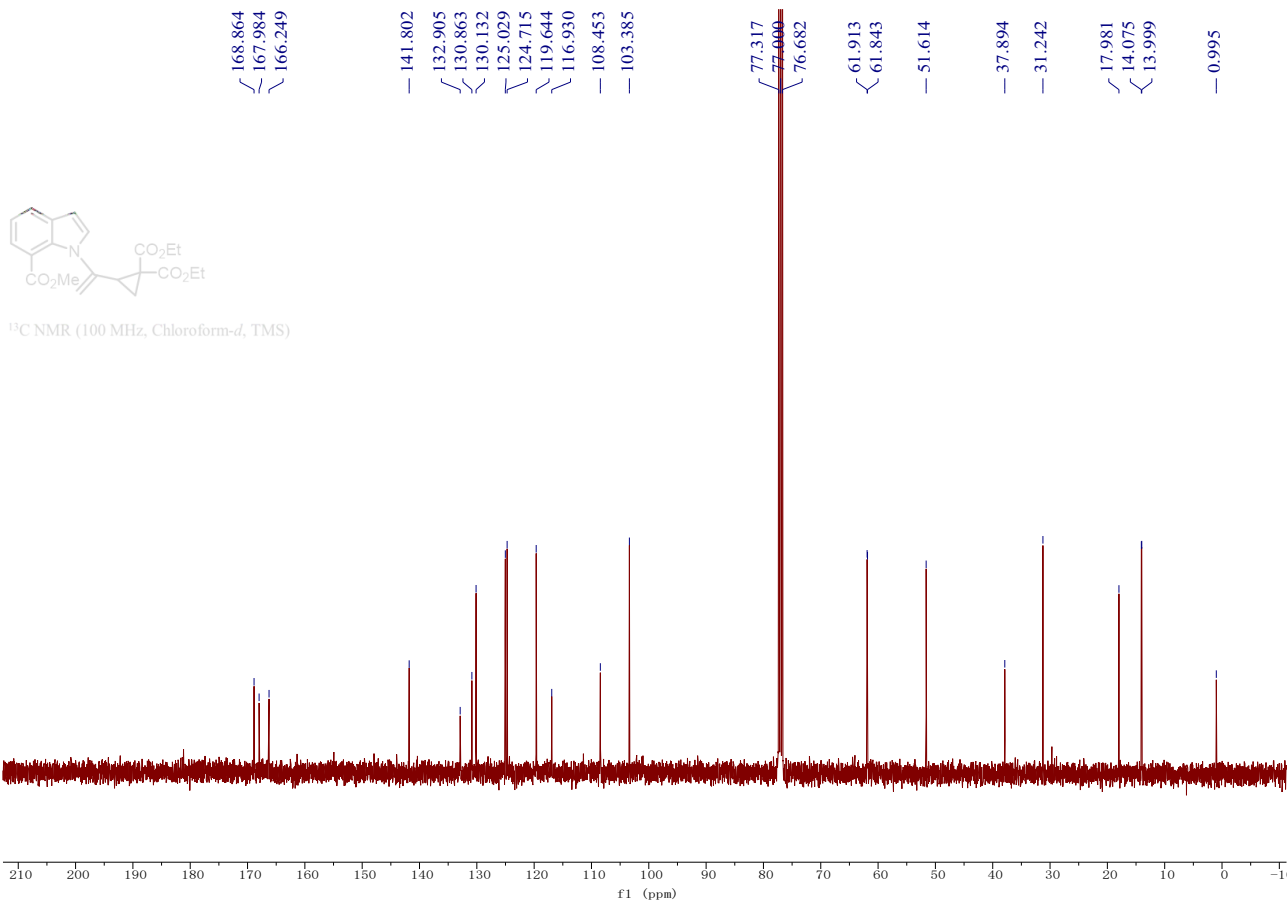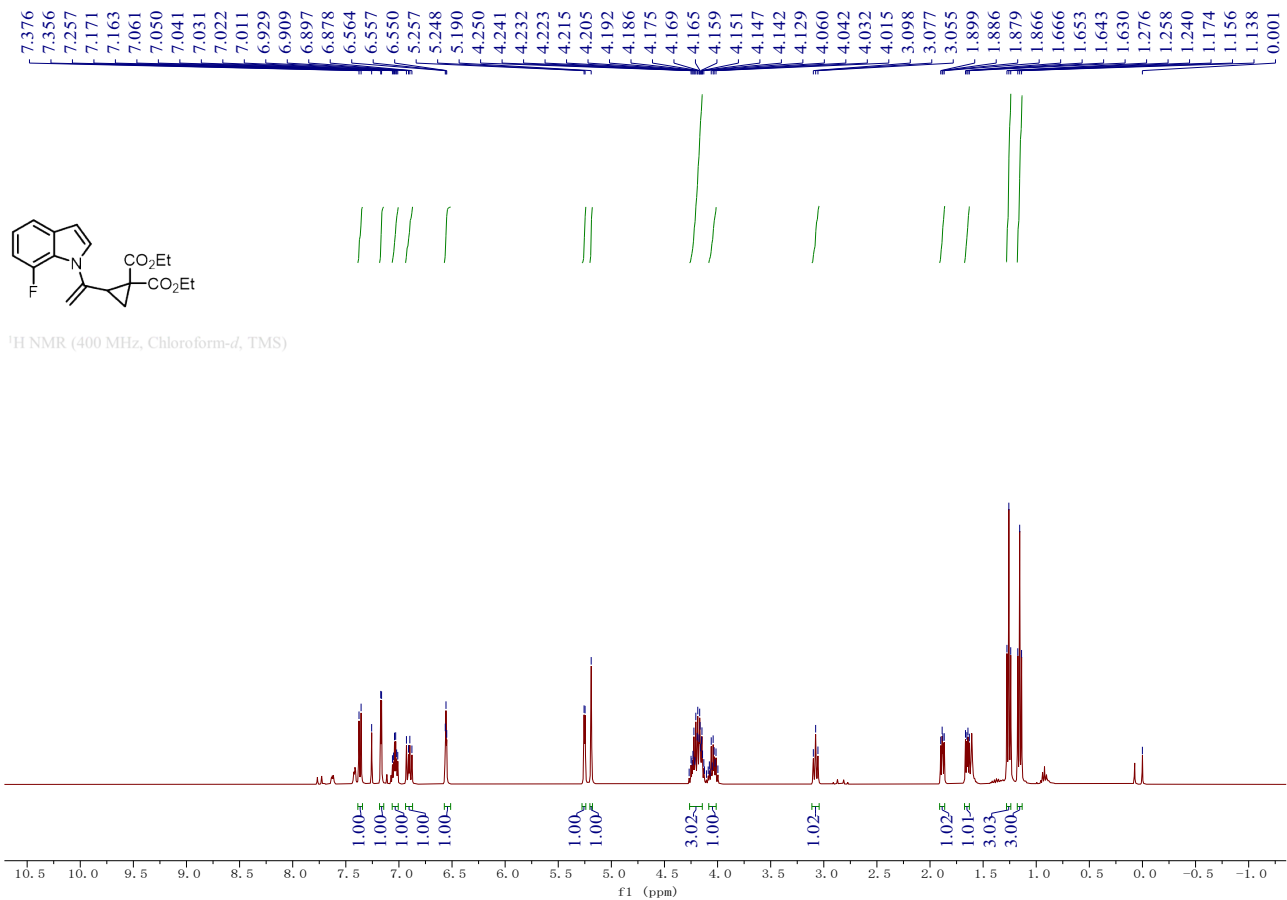

<sup>13</sup>C NMR (100 MHz, Chloroform-*d*, TMS) peaks (ppm):  
 169.049, 166.381, 150.765, 148.315, 139.675, 139.658, 133.077, 133.031, 129.227, 128.949, 128.376, 120.671, 120.603, 116.700, 116.664, 111.281, 111.242, 108.446, 108.258, 103.622, 103.602, 77.319, 77.002, 76.684, 61.844, 61.740, 37.455, 31.348, 31.291, 18.741, 13.983, 13.932

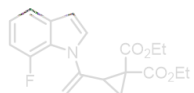

<sup>13</sup>C NMR (100 MHz, Chloroform-*d*, TMS)

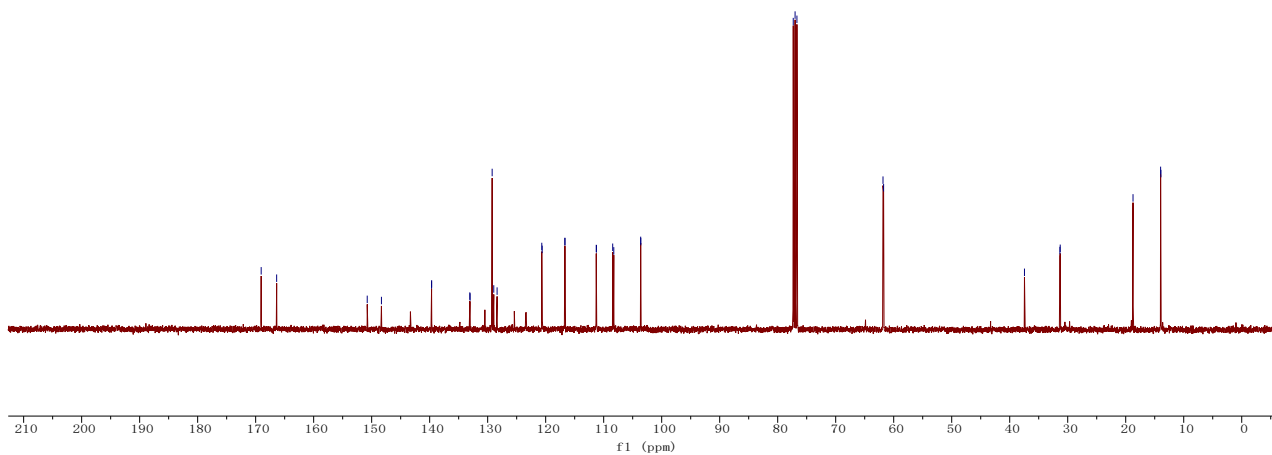

<sup>19</sup>F NMR (376 MHz, Chloroform-*d*, CFCl<sub>3</sub>) peaks (ppm):  
 -126.948, -126.983

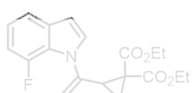

<sup>19</sup>F NMR (376 MHz, Chloroform-*d*, CFCl<sub>3</sub>)

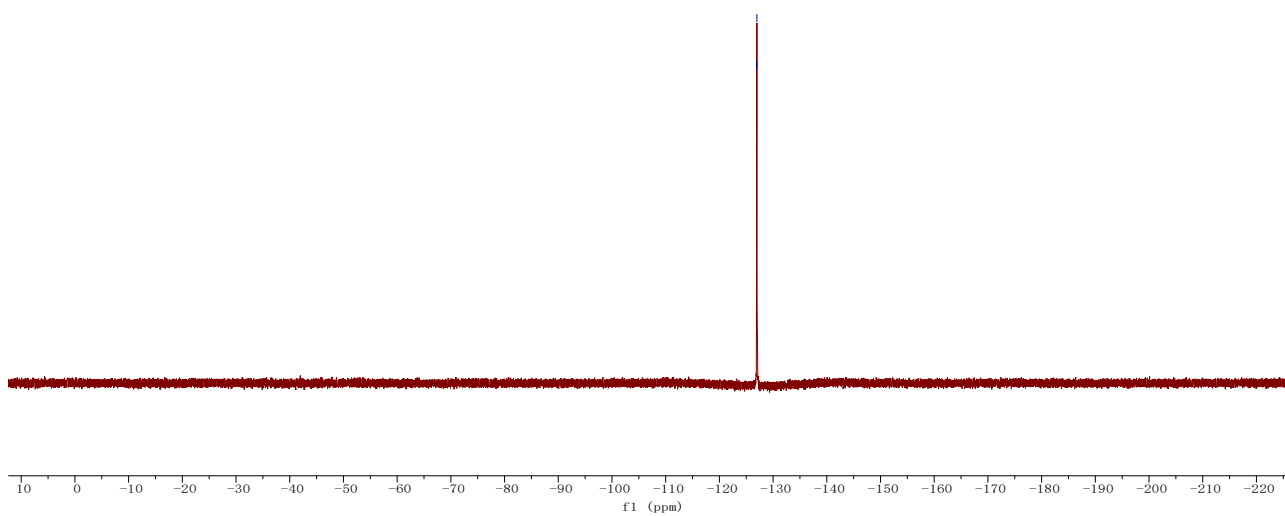

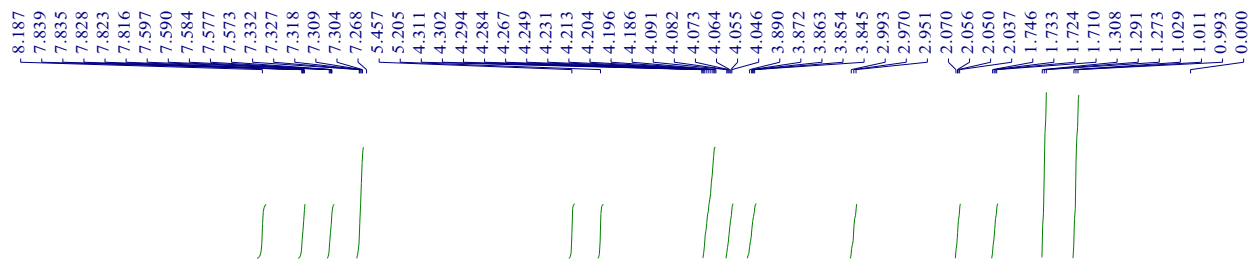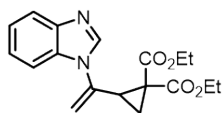

<sup>1</sup>H NMR (400 MHz, Chloroform-*d*, TMS)

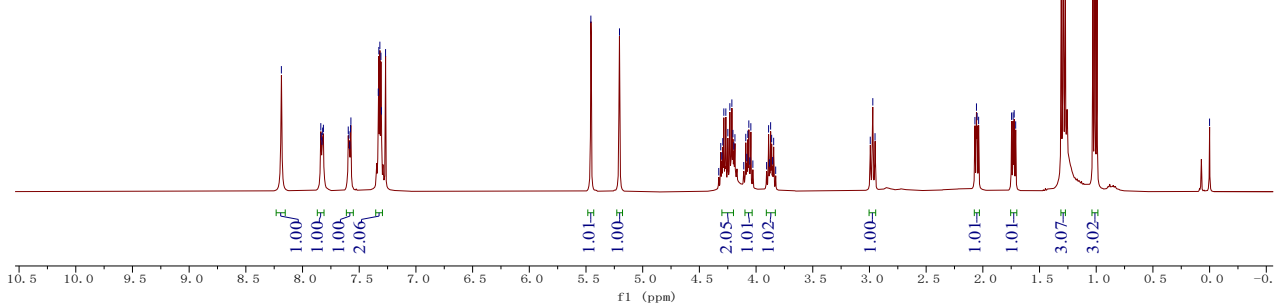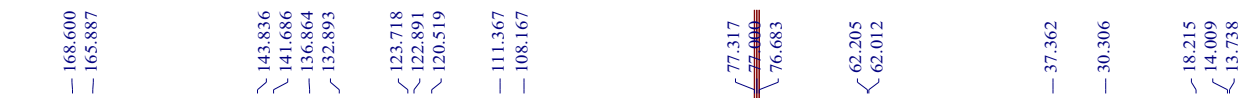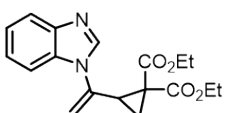

<sup>13</sup>C NMR (100 MHz, Chloroform-*d*, TMS)

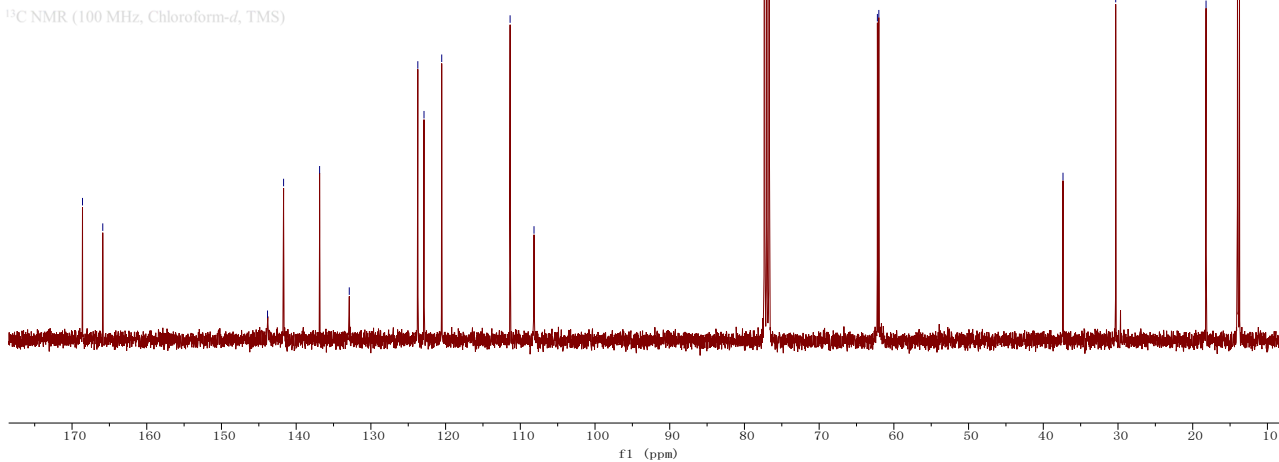





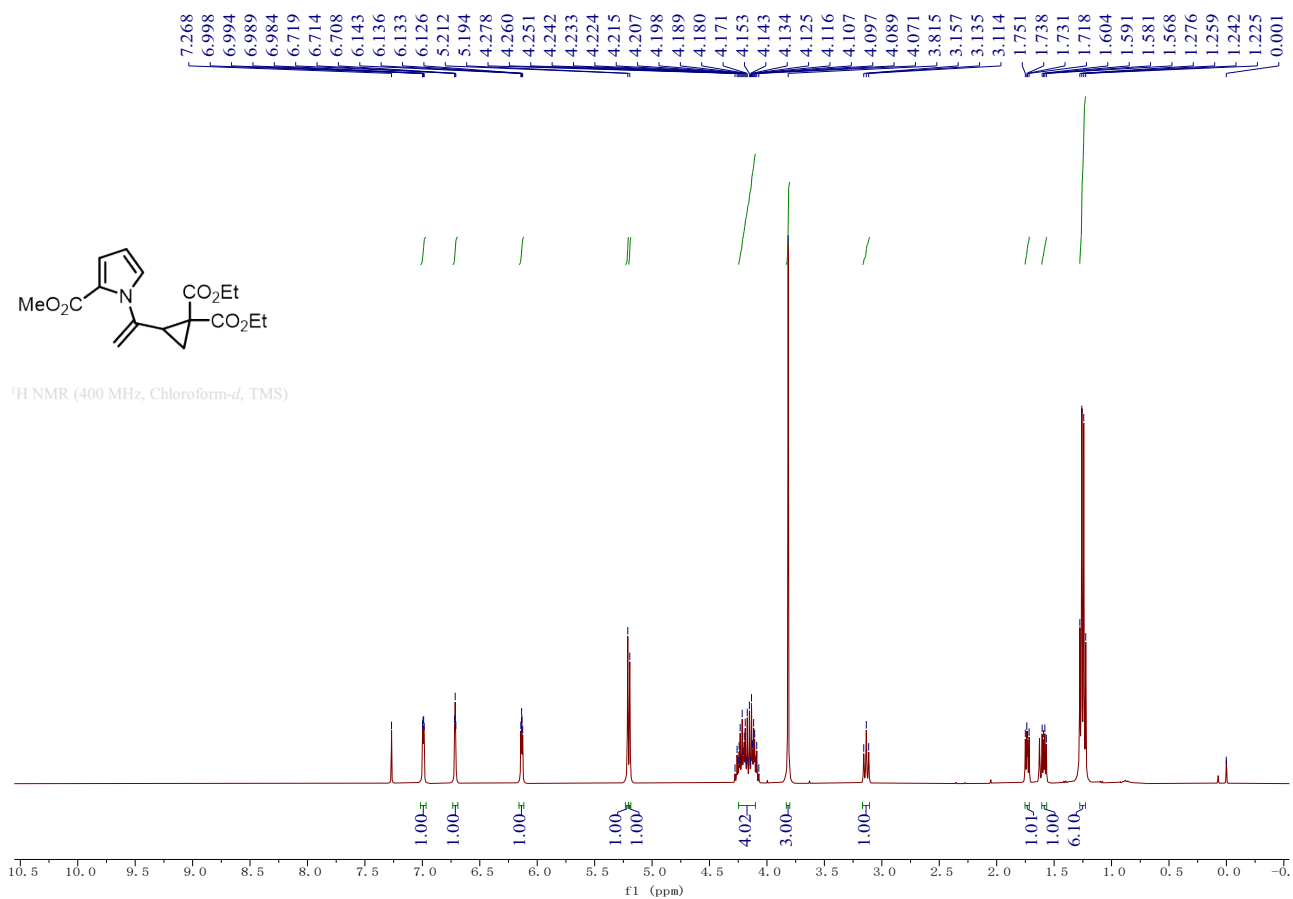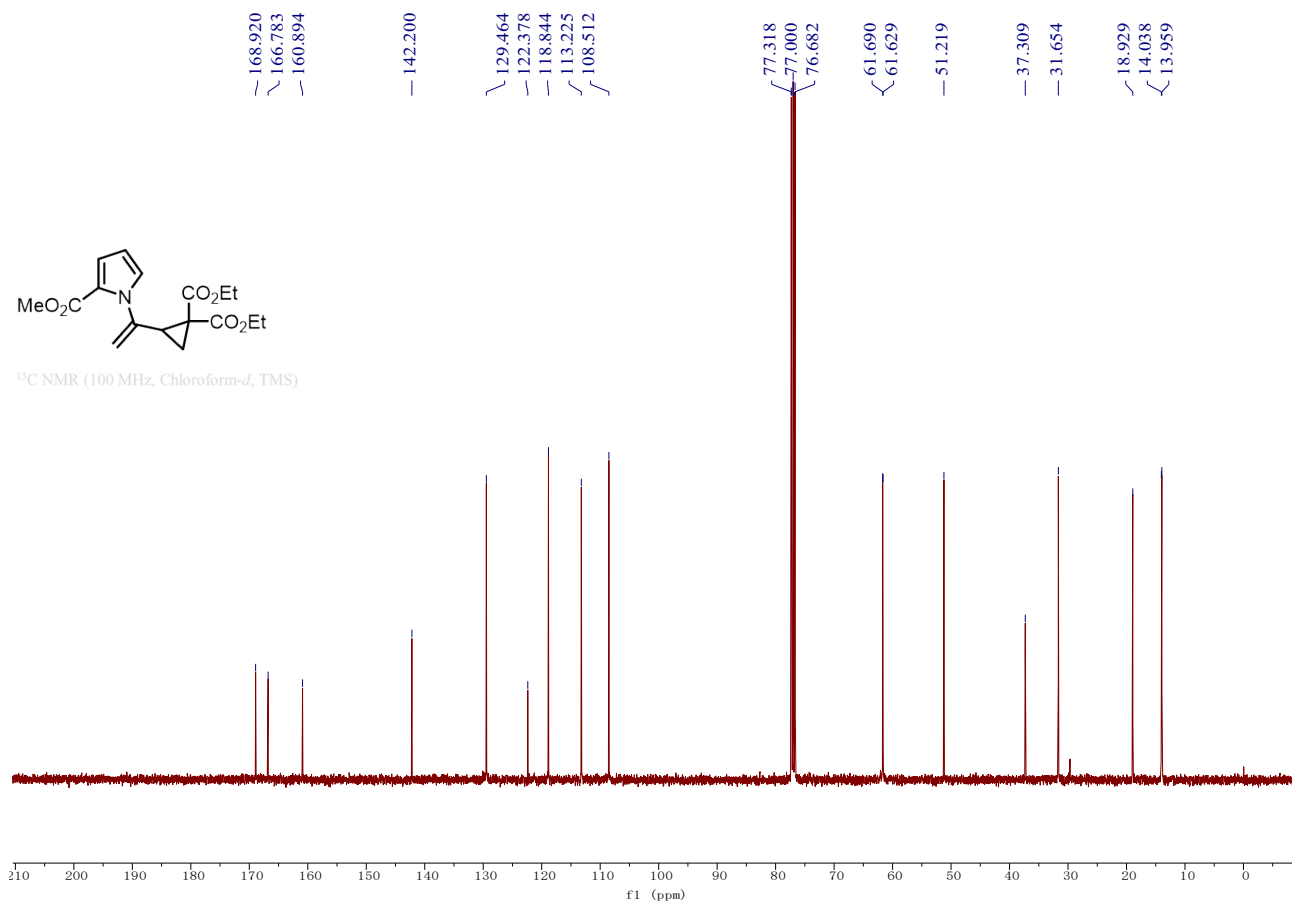

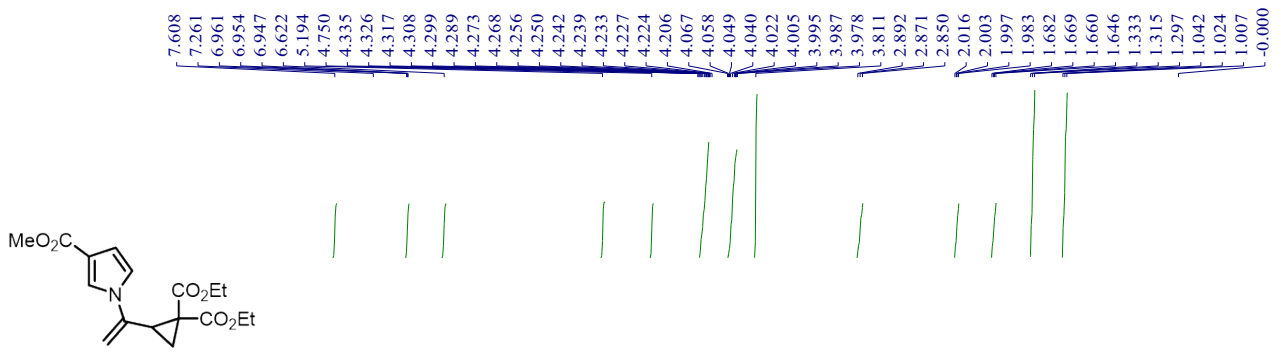

<sup>1</sup>H NMR (400 MHz, Chloroform-*d*, TMS)

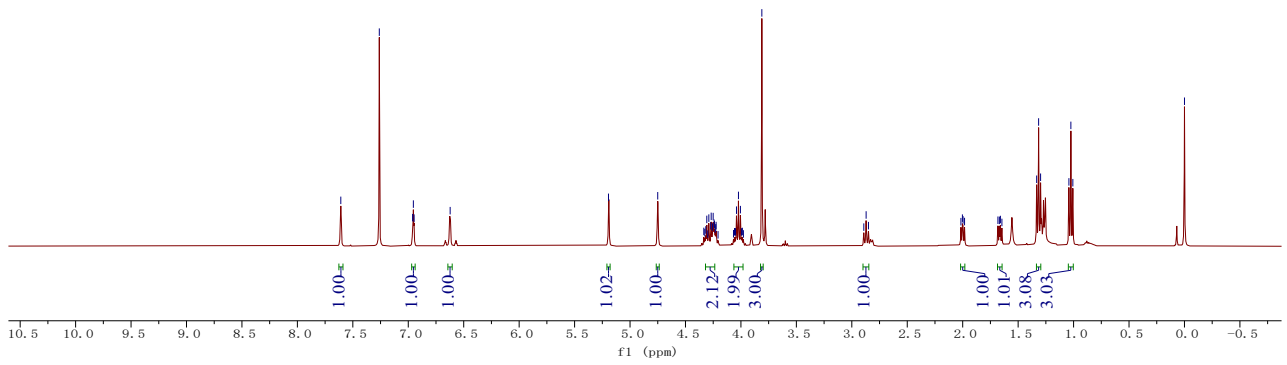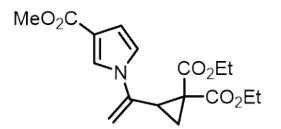

<sup>13</sup>C NMR (100 MHz, Chloroform-*d*, TMS)

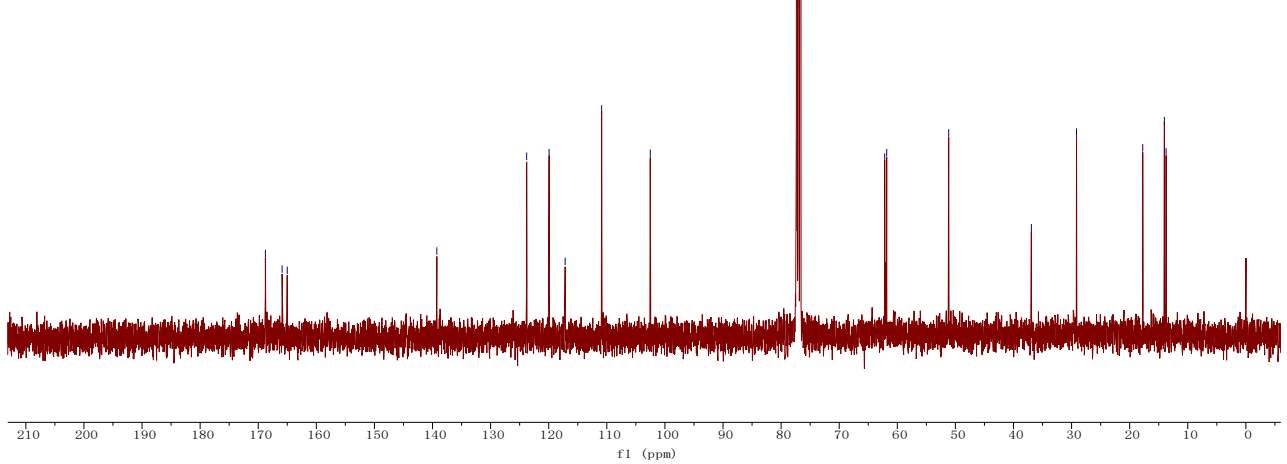

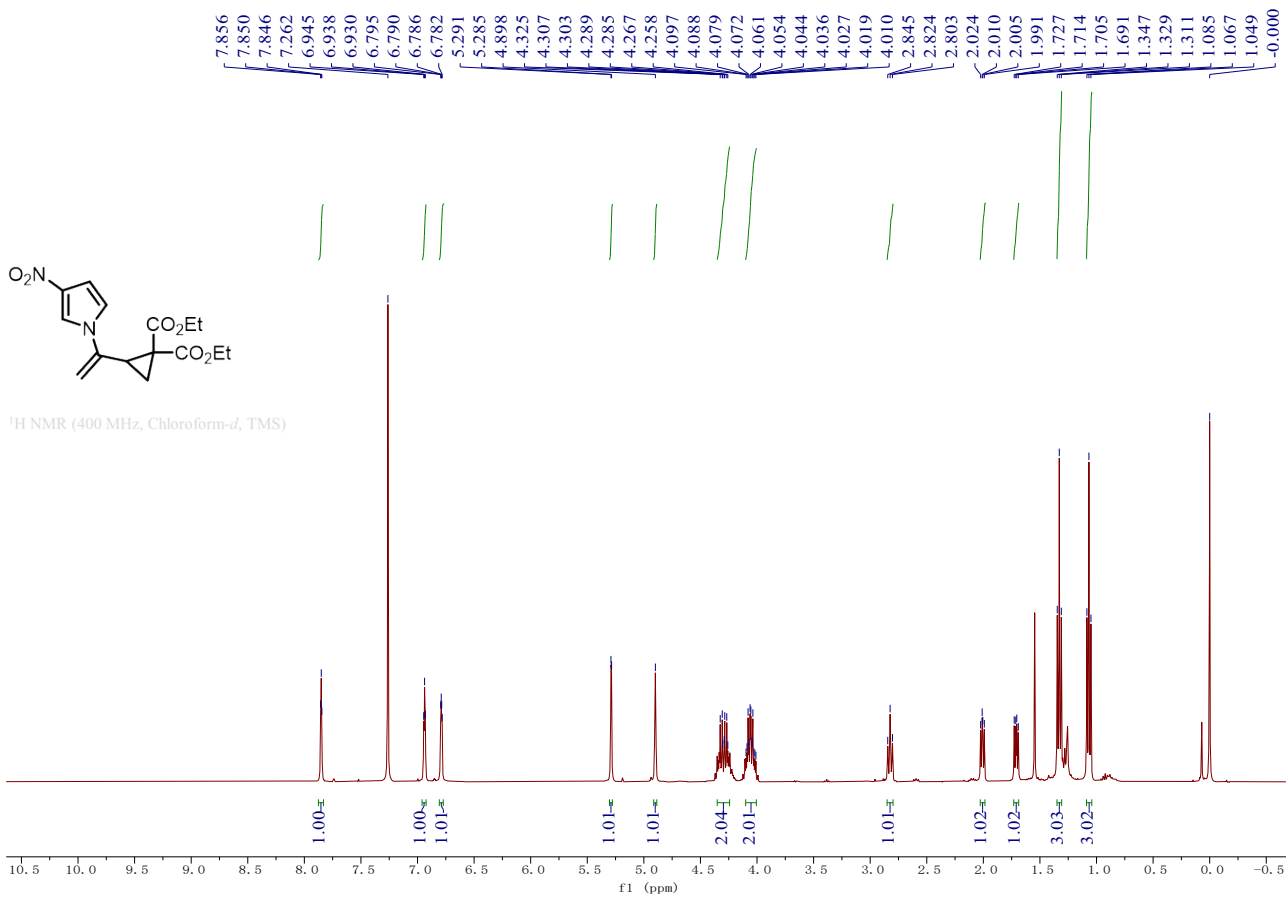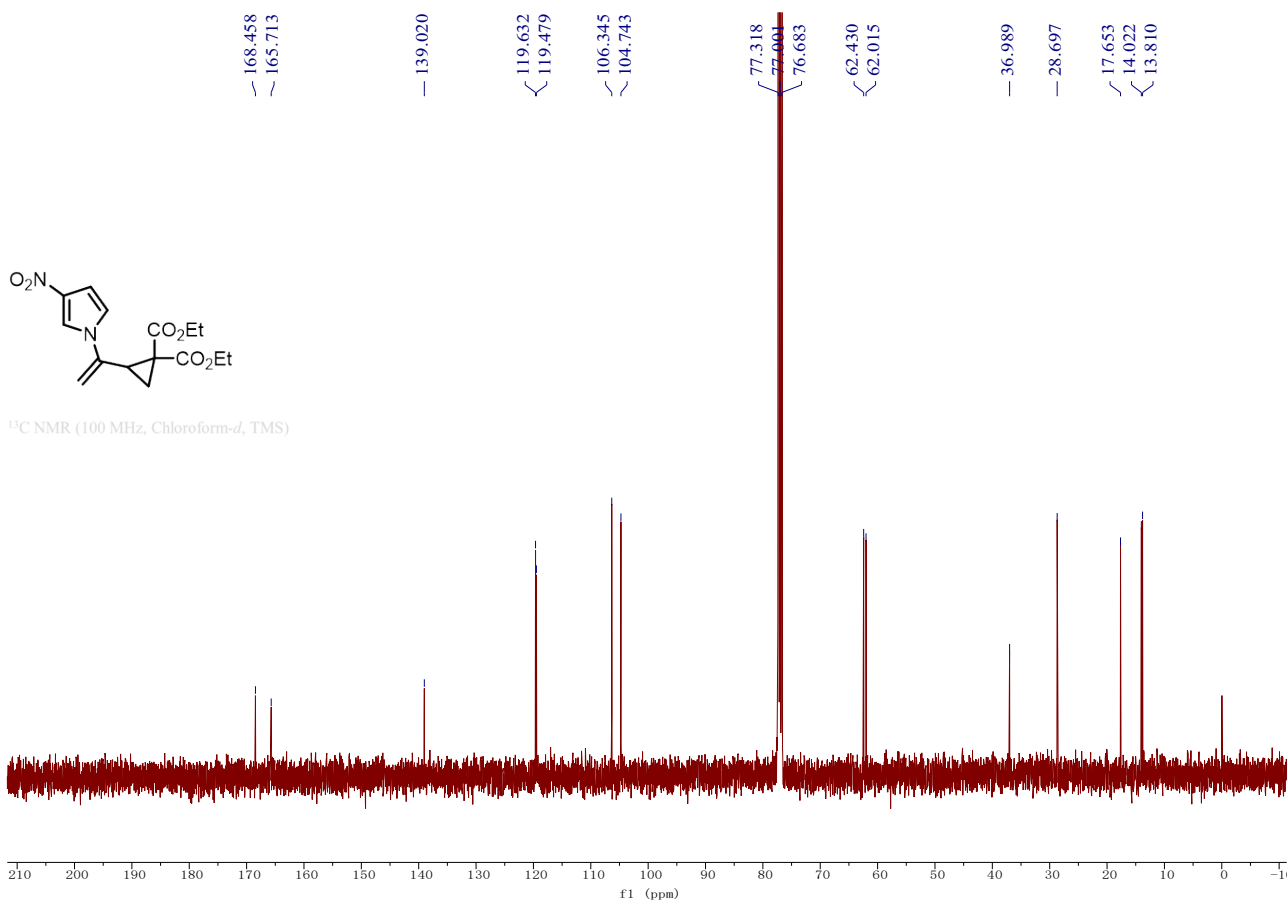

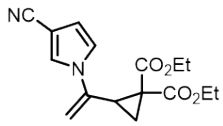

<sup>1</sup>H NMR (400 MHz, Chloroform-d, TMS)

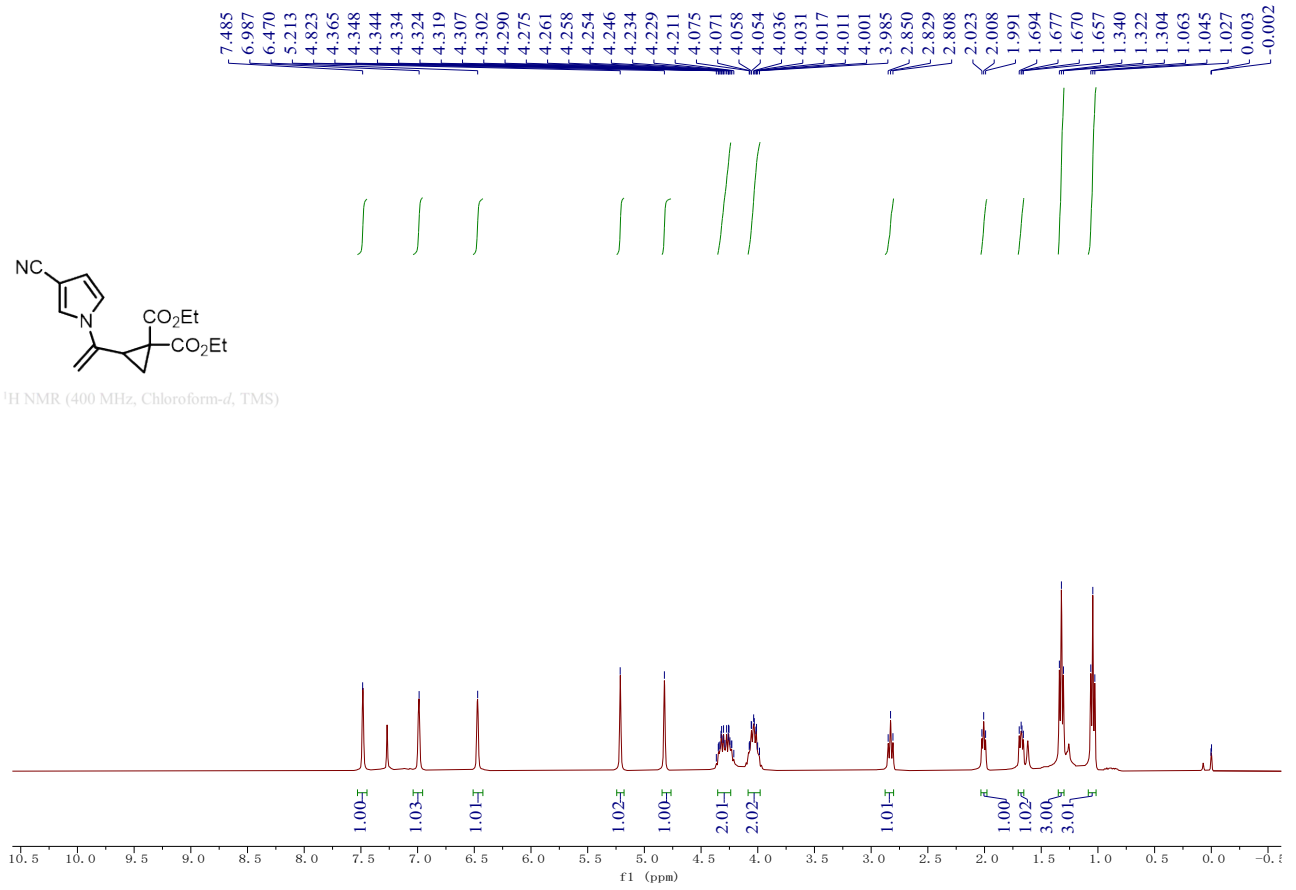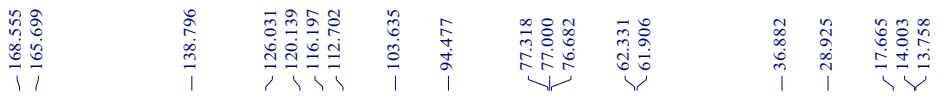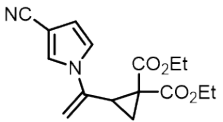

<sup>13</sup>C NMR (100 MHz, Chloroform-d, TMS)

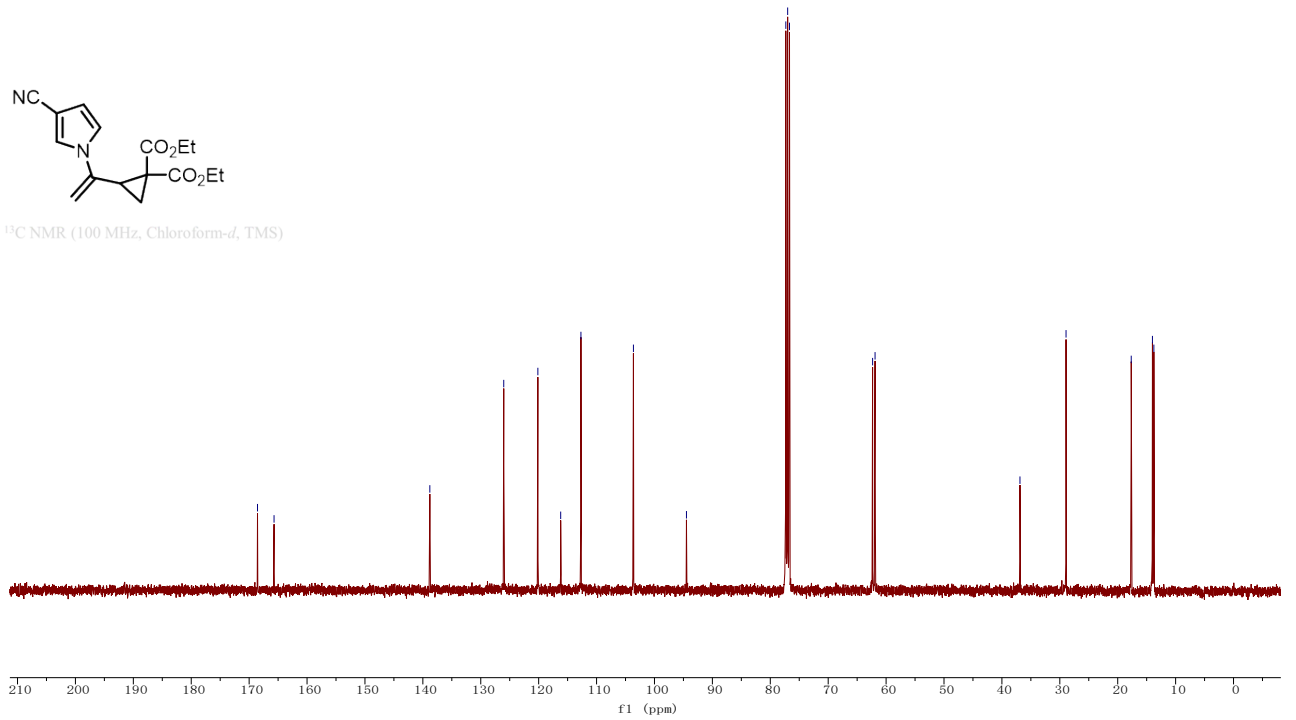

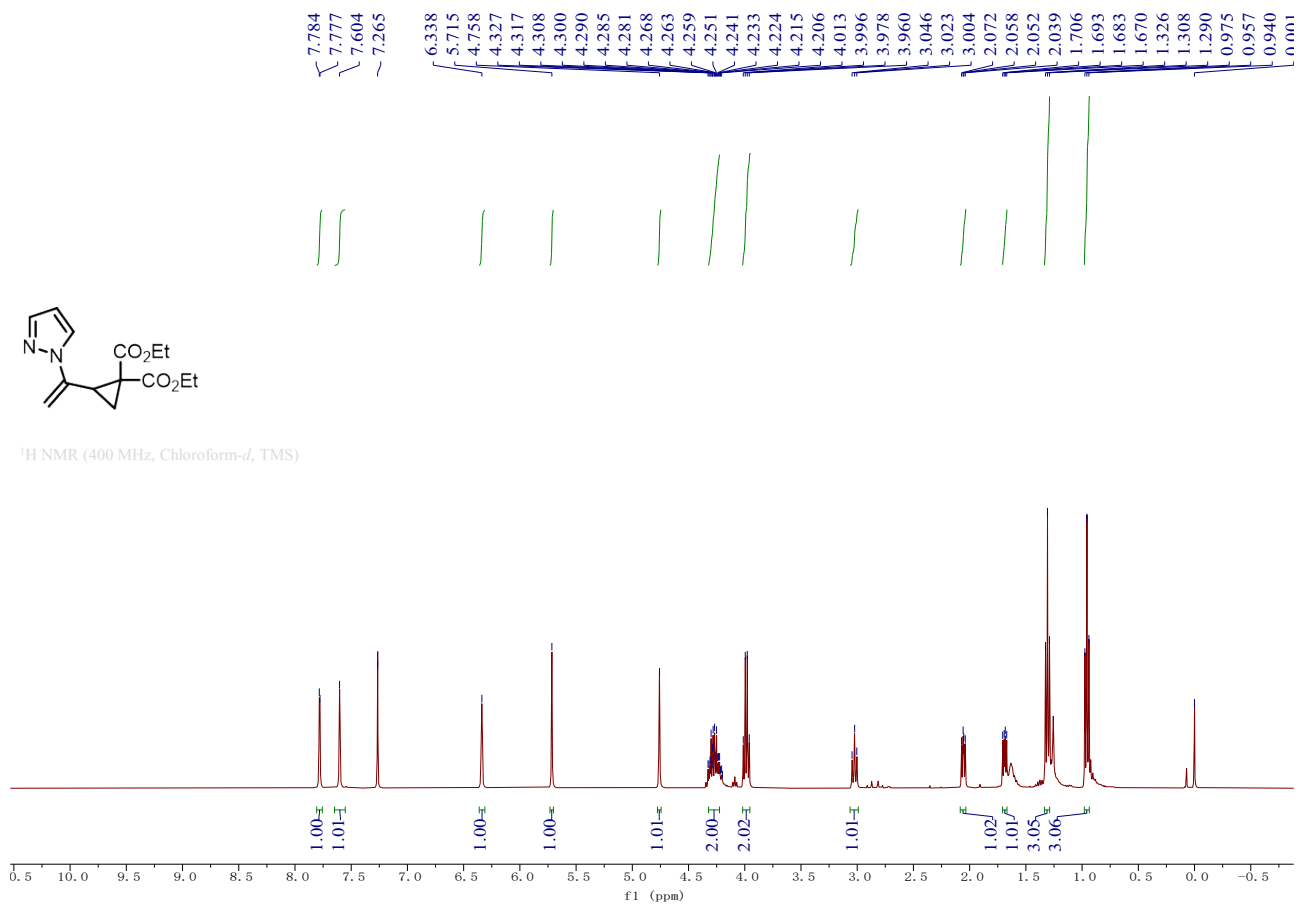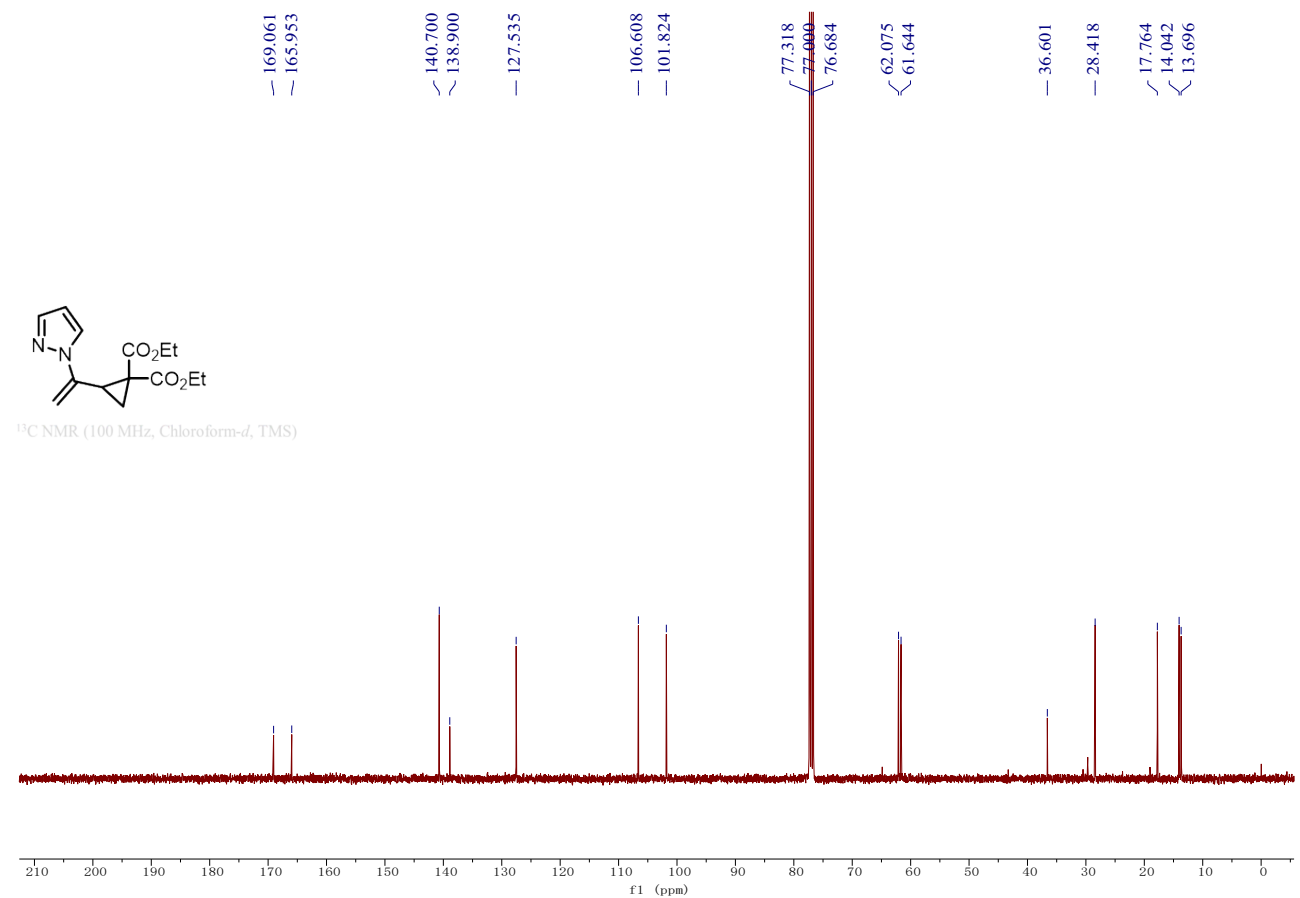

Supplement: d2cc03635e1.pdf [file d2cc03635e1.pdf]
